# Supplementary material for: Change in Anopheles richness and composition in response to artificial flooding during the creation of the Jirau hydroelectric dam in Porto Velho, Brazil
Source: Springer Nature journal article supplement (doi:10.1186/s12936-017-1738-7), 2017-02-22
Supplement: MOESM2 [file 12085522]

mes	ano	area	esp	lat	long	UTM_X	UTM_Y	Etapa	collected
Apr	2011	BALSA ABUNA	Anopheles darlingi	-9.666732	-65.435894	232692.9	8930479.9	Pre_flood	1
Apr	2011	BALSA ABUNA	Anopheles darlingi	-9.666732	-65.435894	232692.9	8930479.9	Pre_flood	1
Apr	2011	BALSA ABUNA	Anopheles darlingi	-9.666732	-65.435894	232692.9	8930479.9	Pre_flood	1
Apr	2011	BALSA ABUNA	Anopheles darlingi	-9.666732	-65.435894	232692.9	8930479.9	Pre_flood	1
Apr	2011	BALSA ABUNA	Anopheles darlingi	-9.666732	-65.435894	232692.9	8930479.9	Pre_flood	1
Apr	2011	BALSA ABUNA	Anopheles darlingi	-9.666732	-65.435894	232692.9	8930479.9	Pre_flood	1
Apr	2011	BALSA ABUNA	Anopheles darlingi	-9.666732	-65.435894	232692.9	8930479.9	Pre_flood	1
Apr	2011	BALSA ABUNA	Anopheles darlingi	-9.666732	-65.435894	232692.9	8930479.9	Pre_flood	1
Apr	2011	BALSA ABUNA	Anopheles darlingi	-9.666732	-65.435894	232692.9	8930479.9	Pre_flood	1
Apr	2011	BALSA ABUNA	Anopheles darlingi	-9.666732	-65.435894	232692.9	8930479.9	Pre_flood	1
Apr	2011	BALSA ABUNA	Anopheles darlingi	-9.666732	-65.435894	232692.9	8930479.9	Pre_flood	1
Apr	2011	BALSA ABUNA	Anopheles darlingi	-9.666732	-65.435894	232692.9	8930479.9	Pre_flood	1
Apr	2011	BALSA ABUNA	Anopheles darlingi	-9.666732	-65.435894	232692.9	8930479.9	Pre_flood	1
Apr	2011	BALSA ABUNA	Anopheles darlingi	-9.666732	-65.435894	232692.9	8930479.9	Pre_flood	1
Apr	2011	MUTUM PARANA	Anopheles darlingi	-9.426522	-64.94316	286757.6	8935878.9	Pre_flood	1
Apr	2011	MUTUM PARANA	Anopheles darlingi	-9.621065	-64.94316	286757.6	8935878.9	Pre_flood	1
Apr	2011	MUTUM PARANA	Anopheles darlingi	-9.621065	-64.94316	286757.6	8935878.9	Pre_flood	1
Apr	2011	MUTUM PARANA	Anopheles darlingi	-9.621065	-64.94316	286757.6	8935878.9	Pre_flood	1
Apr	2011	MUTUM PARANA	Anopheles darlingi	-9.621065	-64.94316	286757.6	8935878.9	Pre_flood	1
Apr	2011	MUTUM PARANA	Anopheles darlingi	-9.621065	-64.94316	286757.6	8935878.9	Pre_flood	1
Apr	2011	MUTUM PARANA	Anopheles darlingi	-9.621065	-64.94316	286757.6	8935878.9	Pre_flood	1
Apr	2011	MUTUM PARANA	Anopheles darlingi	-9.621065	-64.94316	286757.6	8935878.9	Pre_flood	1
Apr	2011	MUTUM PARANA	Anopheles darlingi	-9.621065	-64.94316	286757.6	8935878.9	Pre_flood	1
Apr	2011	MUTUM PARANA	Anopheles darlingi	-9.621065	-64.94316	286757.6	8935878.9	Pre_flood	1
Apr	2011	MUTUM PARANA	Anopheles darlingi	-9.621065	-64.94316	286757.6	8935878.9	Pre_flood	1
Apr	2011	MUTUM PARANA	Anopheles darlingi	-9.621065	-64.94316	286757.6	8935878.9	Pre_flood	1
Apr	2011	MUTUM PARANA	Anopheles darlingi	-9.621065	-64.94316	286757.6	8935878.9	Pre_flood	1
Apr	2011	JACI PARANA	Anopheles darlingi	-9.259651	-64.395767	346682.2	8976140.8	Pre_flood	1
Apr	2011	BALSA ABUNA	Anopheles darlingi	-9.666732	-65.435894	232692.9	8930479.9	Pre_flood	1
Apr	2011	BALSA ABUNA	Anopheles darlingi	-9.666732	-65.435894	232692.9	8930479.9	Pre_flood	1
Apr	2011	BALSA ABUNA	Anopheles darlingi	-9.666732	-65.435894	232692.9	8930479.9	Pre_flood	1
Apr	2011	BALSA ABUNA	Anopheles darlingi	-9.666732	-65.435894	232692.9	8930479.9	Pre_flood	1
Apr	2011	BALSA ABUNA	Anopheles darlingi	-9.666732	-65.435894	232692.9	8930479.9	Pre_flood	1
Apr	2011	BALSA ABUNA	Anopheles darlingi	-9.666732	-65.435894	232692.9	8930479.9	Pre_flood	1
Apr	2011	BALSA ABUNA	Anopheles darlingi	-9.666732	-65.435894	232692.9	8930479.9	Pre_flood	1
Apr	2011	BALSA ABUNA	Anopheles darlingi	-9.666732	-65.435894	232692.9	8930479.9	Pre_flood	1
Apr	2011	BALSA ABUNA	Anopheles darlingi	-9.666732	-65.435894	232692.9	8930479.9	Pre_flood	1
Apr	2011	BALSA ABUNA	Anopheles darlingi	-9.666732	-65.435894	232692.9	8930479.9	Pre_flood	1
Apr	2011	BALSA ABUNA	Anopheles darlingi	-9.666732	-65.435894	232692.9	8930479.9	Pre_flood	1
Apr	2011	MUTUM PARANA	Anopheles darlingi	-9.621065	-64.94316	286757.6	8935878.9	Pre_flood	1
Apr	2011	MUTUM PARANA	Anopheles darlingi	-9.621065	-64.94316	286757.6	8935878.9	Pre_flood	1
Apr	2011	MUTUM PARANA	Anopheles darlingi	-9.621065	-64.94316	286757.6	8935878.9	Pre_flood	1
Apr	2011	MUTUM PARANA	Anopheles darlingi	-9.621065	-64.94316	286757.6	8935878.9	Pre_flood	1
Apr	2011	MUTUM PARANA	Anopheles darlingi	-9.621065	-64.94316	286757.6	8935878.9	Pre_flood	1
Apr	2011	MUTUM PARANA	Anopheles darlingi	-9.621065	-64.94316	286757.6	8935878.9	Pre_flood	1
Apr	2011	MUTUM PARANA	Anopheles darlingi	-9.621065	-64.94316	286757.6	8935878.9	Pre_flood	1
Apr	2011	MUTUM PARANA	Anopheles darlingi	-9.621065	-64.94316	286757.6	8935878.9	Pre_flood	1
Apr	2011	MUTUM PARANA	Anopheles darlingi	-9.621065	-64.94316	286757.6	8935878.9	Pre_flood	1
Apr	2011	MUTUM PARANA	Anopheles darlingi	-9.621065	-64.94316	286757.6	8935878.9	Pre_flood	1
Apr	2011	MUTUM PARANA	Anopheles darlingi	-9.621065	-64.94316	286757.6	8935878.9	Pre_flood	1
Apr	2011	MUTUM PARANA	Anopheles darlingi	-9.621065	-64.94316	286757.6	8935878.9	Pre_flood	1
Apr	2011	MUTUM PARANA	Anopheles darlingi	-9.621065	-64.94316	286757.6	8935878.9	Pre_flood	1
Apr	2011	MUTUM PARANA	Anopheles darlingi	-9.621065	-64.94316	286757.6	8935878.9	Pre_flood	1
Apr	2011	BALSA ABUNA	Anopheles darlingi	-9.666732	-65.435894	232692.9	8930479.9	Pre_flood	1
Apr	2011	BALSA ABUNA	Anopheles darlingi	-9.666732	-65.435894	232692.9	8930479.9	Pre_flood	1
Apr	2011	BALSA ABUNA	Anopheles darlingi	-9.666732	-65.435894	232692.9	8930479.9	Pre_flood	1
Apr	2011	BALSA ABUNA	Anopheles darlingi	-9.666732	-65.435894	232692.9	8930479.9	Pre_flood	1
Apr	2011	BALSA ABUNA	Anopheles darlingi	-9.666732	-65.435894	232692.9	8930479.9	Pre_flood	1
Apr	2011	BALSA ABUNA	Anopheles darlingi	-9.666732	-65.435894	232692.9	8930479.9	Pre_flood	1
Apr	2011	BALSA ABUNA	Anopheles darlingi	-9.666732	-65.435894	232692.9	8930479.9	Pre_flood	1
Apr	2011	BALSA ABUNA	Anopheles darlingi	-9.666732	-65.435894	232692.9	8930479.9	Pre_flood	1
Apr	2011	BALSA ABUNA	Anopheles darlingi	-9.666732	-65.435894	232692.9	8930479.9	Pre_flood	1
Apr	2011	BALSA ABUNA	Anopheles darlingi	-9.666732	-65.435894	232692.9	8930479.9	Pre_flood	1
Apr	2011	BALSA ABUNA	Anopheles darlingi	-9.666732	-65.435894	232692.9	8930479.9	Pre_flood	1
Apr	2011	BALSA ABUNA	Anopheles darlingi	-9.666732	-65.435894	232692.9	8930479.9	Pre_flood	1
Apr	2011	BALSA ABUNA	Anopheles darlingi	-9.666732	-65.435894	232692.9	8930479.9	Pre_flood	1
Apr	2011	BALSA ABUNA	Anopheles darlingi	-9.666732	-65.435894	232692.9	8930479.9	Pre_flood	1
Apr	2011	BALSA ABUNA	Anopheles darlingi	-9.666732	-65.435894	232692.9	8930479.9	Pre_flood	1
Apr	2011	BALSA ABUNA	Anopheles darlingi	-9.666732	-65.435894	232692.9	8930479.9	Pre_flood	1
Apr	2011	BALSA ABUNA	Anopheles darlingi	-9.666732	-65.435894	232692.9	8930479.9	Pre_flood	1
Apr	2011	BALSA ABUNA	Anopheles darlingi	-9.666732	-65.435894	232692.9	8930479.9	Pre_flood	1
Apr	2011	BALSA ABUNA	Anopheles darlingi	-9.666732	-65.435894	232692.9	8930479.9	Pre_flood	1
Apr	2011	BALSA ABUNA	Anopheles darlingi	-9.666732	-65.435894	232692.9	8930479.9	Pre_flood	1
Apr	2011	BALSA ABUNA	Anopheles darlingi	-9.666732	-65.435894	232692.9	8930479.9	Pre_flood	1
Apr	2011	BALSA ABUNA	Anopheles darlingi	-9.666732	-65.435894	232692.9	8930479.9	Pre_flood	1
Apr	2011	BALSA ABUNA	Anopheles darlingi	-9.666732	-65.435894	232692.9	8930479.9	Pre_flood	1
Apr	2011	BALSA ABUNA	Anopheles darlingi	-9.666732	-65.435894	232692.9	8930479.9	Pre_flood	1
Apr	2011	BALSA ABUNA	Anopheles darlingi	-9.666732	-65.435894	232692.9	8930479.9	Pre_flood	1
Apr	2011	BALSA ABUNA	Anopheles darlingi	-9.666732	-65.435894	232692.9	8930479.9	Pre_flood	1
Apr	2011	BALSA ABUNA	Anopheles darlingi	-9.666732	-65.435894	232692.9	8930479.9	Pre_flood	1
Apr	2011	BALSA ABUNA	Anopheles darlingi	-9.666732	-65.435894	232692.9	8930479.9	Pre_flood	1
Apr	2011	BALSA ABUNA	Anopheles darlingi	-9.666732	-65.435894	232692.9	8930479.9	Pre_flood	1
Apr	2011	BALSA ABUNA	Anopheles darlingi	-9.666732	-65.435894	232692.9	8930479.9	Pre_flood	1
Apr	2011	BALSA ABUNA	Anopheles darlingi	-9.666732	-65.435894	232692.9	8930479.9	Pre_flood	1
Apr	2011	BALSA ABUNA	Anopheles darlingi	-9.666732	-65.435894	232692.9	8930479.9	Pre_flood	1
Apr	2011	BALSA ABUNA	Anopheles darlingi	-9.666732	-65.435894	232692.9	8930479.9	Pre_flood	1
Apr	2011	BALSA ABUNA	Anopheles darlingi	-9.666732	-65.435894	232692.9	8930479.9	Pre_flood	1
Apr	2011	BALSA ABUNA	Anopheles darlingi	-9.666732	-65.435894	232692.9	8930479.9	Pre_flood	1
Apr	2011	BALSA ABUNA	Anopheles darlingi	-9.666732	-65.435894	232692.9	8930479.9	Pre_flood	1
Apr	2011	MUTUM PARANA	Anopheles darlingi	-9.621065	-64.94316	286757.6	8935878.9	Pre_flood	1
Apr	2011	MUTUM PARANA	Anopheles darlingi	-9.621065	-64.94316	286757.6	8935878.9	Pre_flood	1
Apr	2011	MUTUM PARANA	Anopheles darlingi	-9.621065	-64.94316	286757.6	8935878.9	Pre_flood	1
Apr	2011	MUTUM PARANA	Anopheles darlingi	-9.621065	-64.94316	286757.6	8935878.9	Pre_flood	1
Apr	2011	MUTUM PARANA	Anopheles darlingi	-9.621065	-64.94316	286757.6	8935878.9	Pre_flood	1
Apr	2011	MUTUM PARANA	Anopheles darlingi	-9.621065	-64.94316	286757.6	8935878.9	Pre_flood	1
Apr	2011	MUTUM PARANA	Anopheles darlingi	-9.621065	-64.94316	286757.6	8935878.9	Pre_flood	1
Apr	2011	MUTUM PARANA	Anopheles darlingi	-9.621065	-64.94316	286757.6	8935878.9	Pre_flood	1
Apr	2011	MUTUM PARANA	Anopheles darlingi	-9.621065	-64.94316	286757.6	8935878.9	Pre_flood	1
Apr	2011	MUTUM PARANA	Anopheles darlingi	-9.621065	-64.94316	286757.6	8935878.9	Pre_flood	1
Apr	2011	MUTUM PARANA	Anopheles darlingi	-9.621065	-64.94316	286757.6	8935878.9	Pre_flood	1
Apr	2011	MUTUM PARANA	Anopheles darlingi	-9.621065	-64.94316	286757.6	8935878.9	Pre_flood	1
Apr	2011	MUTUM PARANA	Anopheles darlingi	-9.621065	-64.94316	286757.6	8935878.9	Pre_flood	1
Apr	2011	MUTUM PARANA	Anopheles darlingi	-9.621065	-64.94316	286757.6	8935878.9	Pre_flood	1
Apr	2011	MUTUM PARANA	Anopheles darlingi	-9.621065	-64.94316	286757.6	8935878.9	Pre_flood	1
Apr	2011	MUTUM PARANA	Anopheles darlingi	-9.621065	-64.94316	286757.6	8935878.9	Pre_flood	1
Apr	2011	MUTUM PARANA	Anopheles darlingi	-9.621065	-64.94316	286757.6	8935878.9	Pre_flood	1
Apr	2011	MUTUM PARANA	Anopheles darlingi	-9.621065	-64.94316	286757.6	8935878.9	Pre_flood	1
Apr	2011	MUTUM PARANA	Anopheles darlingi	-9.621065	-64.94316	286757.6	8935878.9	Pre_flood	1
Apr	2011	MUTUM PARANA	Anopheles darlingi	-9.621065	-64.94316	286757.6	8935878.9	Pre_flood	1
Apr	2011	MUTUM PARANA	Anopheles darlingi	-9.621065	-64.94316	286757.6	8935878.9	Pre_flood	1
Apr	2011	BALSA ABUNA	Anopheles darlingi	-9.666732	-65.435894	232692.9	8930479.9	Pre_flood	1
Apr	2011	BALSA ABUNA	Anopheles darlingi	-9.666732	-65.435894	232692.9	8930479.9	Pre_flood	1
Apr	2011	BALSA ABUNA	Anopheles darlingi	-9.666732	-65.435894	232692.9	8930479.9	Pre_flood	1
Apr	2011	BALSA ABUNA	Anopheles darlingi	-9.666732	-65.435894	232692.9	8930479.9	Pre_flood	1
Apr	2011	BALSA ABUNA	Anopheles darlingi	-9.666732	-65.435894	232692.9	8930479.9	Pre_flood	1
Apr	2011	BALSA ABUNA	Anopheles darlingi	-9.666732	-65.435894	232692.9	8930479.9	Pre_flood	1
Apr	2011	BALSA ABUNA	Anopheles darlingi	-9.666732	-65.435894	232692.9	8930479.9	Pre_flood	1
Apr	2011	BALSA ABUNA	Anopheles darlingi	-9.666732	-65.435894	232692.9	8930479.9	Pre_flood	1
Apr	2011	BALSA ABUNA	Anopheles darlingi	-9.666732	-65.435894	232692.9	8930479.9	Pre_flood	1
Apr	2011	BALSA ABUNA	Anopheles darlingi	-9.666732	-65.435894	232692.9	8930479.9	Pre_flood	1
Apr	2011	BALSA ABUNA	Anopheles darlingi	-9.666732	-65.435894	232692.9	8930479.9	Pre_flood	1
Apr	2011	BALSA ABUNA	Anopheles darlingi	-9.666732	-65.435894	232692.9	8930479.9	Pre_flood	1
Apr	2011	BALSA ABUNA	Anopheles darlingi	-9.666732	-65.435894	232692.9	8930479.9	Pre_flood	1
Apr	2011	BALSA ABUNA	Anopheles darlingi	-9.666732	-65.435894	232692.9	8930479.9	Pre_flood	1
Apr	2011	BALSA ABUNA	Anopheles darlingi	-9.666732	-65.435894	232692.9	8930479.9	Pre_flood	1
Apr	2011	BALSA ABUNA	Anopheles darlingi	-9.666732	-65.435894	232692.9	8930479.9	Pre_flood	1
Apr	2011	BALSA ABUNA	Anopheles darlingi	-9.666732	-65.435894	232692.9	8930479.9	Pre_flood	1
Apr	2011	BALSA ABUNA	Anopheles darlingi	-9.666732	-65.435894	232692.9	8930479.9	Pre_flood	1
Apr	2011	BALSA ABUNA	Anopheles darlingi	-9.666732	-65.435894	232692.9	8930479.9	Pre_flood	1
Apr	2011	BALSA ABUNA	Anopheles darlingi	-9.666732	-65.435894	232692.9	8930479.9	Pre_flood	1
Apr	2011	JACI PARANA	Anopheles darlingi	-9.259651	-64.395767	346682.2	8976140.8	Pre_flood	1
Apr	2011	JACI PARANA	Anopheles darlingi	-9.259651	-64.395767	346682.2	8976140.8	Pre_flood	1
Apr	2011	JACI PARANA	Anopheles darlingi	-9.259651	-64.395767	346682.2	8976140.8	Pre_flood	1
Apr	2011	BALSA ABUNA	Anopheles darlingi	-9.666732	-65.435894	232692.9	8930479.9	Pre_flood	1
Apr	2011	BALSA ABUNA	Anopheles darlingi	-9.666732	-65.435894	232692.9	8930479.9	Pre_flood	1
Apr	2011	BALSA ABUNA	Anopheles darlingi	-9.666732	-65.435894	232692.9	8930479.9	Pre_flood	1
Apr	2011	MUTUM PARANA	Anopheles darlingi	-9.621065	-64.94316	286757.6	8935878.9	Pre_flood	1
Apr	2011	MUTUM PARANA	Anopheles darlingi	-9.621065	-64.94316	286757.6	8935878.9	Pre_flood	1
Apr	2011	MUTUM PARANA	Anopheles darlingi	-9.621065	-64.94316	286757.6	8935878.9	Pre_flood	1
Apr	2011	MUTUM PARANA	Anopheles darlingi	-9.621065	-64.94316	286757.6	8935878.9	Pre_flood	1
Apr	2011	MUTUM PARANA	Anopheles darlingi	-9.621065	-64.94316	286757.6	8935878.9	Pre_flood	1
Apr	2011	MUTUM PARANA	Anopheles darlingi	-9.621065	-64.94316	286757.6	8935878.9	Pre_flood	1
Apr	2011	MUTUM PARANA	Anopheles darlingi	-9.621065	-64.94316	286757.6	8935878.9	Pre_flood	1
Apr	2011	MUTUM PARANA	Anopheles darlingi	-9.621065	-64.94316	286757.6	8935878.9	Pre_flood	1
Apr	2011	BALSA ABUNA	Anopheles darlingi	-9.666732	-65.435894	232692.9	8930479.9	Pre_flood	1
Apr	2011	BALSA ABUNA	Anopheles darlingi	-9.666732	-65.435894	232692.9	8930479.9	Pre_flood	1
Apr	2011	MUTUM PARANA	Anopheles darlingi	-9.621065	-64.94316	286757.6	8935878.9	Pre_flood	1
Apr	2011	MUTUM PARANA	Anopheles darlingi	-9.621065	-64.94316	286757.6	8935878.9	Pre_flood	1
Apr	2011	MUTUM PARANA	Anopheles darlingi	-9.621065	-64.94316	286757.6	8935878.9	Pre_flood	1
Apr	2011	MUTUM PARANA	Anopheles darlingi	-9.621065	-64.94316	286757.6	8935878.9	Pre_flood	1
Apr	2011	MUTUM PARANA	Anopheles darlingi	-9.621065	-64.94316	286757.6	8935878.9	Pre_flood	1
Apr	2011	MUTUM PARANA	Anopheles darlingi	-9.621065	-64.94316	286757.6	8935878.9	Pre_flood	1
Apr	2011	MUTUM PARANA	Anopheles darlingi	-9.621065	-64.94316	286757.6	8935878.9	Pre_flood	1
Apr	2011	MUTUM PARANA	Anopheles darlingi	-9.621065	-64.94316	286757.6	8935878.9	Pre_flood	1
Apr	2011	MUTUM PARANA	Anopheles darlingi	-9.621065	-64.94316	286757.6	8935878.9	Pre_flood	1
Apr	2011	MUTUM PARANA	Anopheles darlingi	-9.621065	-64.94316	286757.6	8935878.9	Pre_flood	1
Apr	2011	MUTUM PARANA	Anopheles darlingi	-9.621065	-64.94316	286757.6	8935878.9	Pre_flood	1
Apr	2011	MUTUM PARANA	Anopheles darlingi	-9.621065	-64.94316	286757.6	8935878.9	Pre_flood	1
Apr	2011	MUTUM PARANA	Anopheles darlingi	-9.621065	-64.94316	286757.6	8935878.9	Pre_flood	1
Apr	2011	MUTUM PARANA	Anopheles darlingi	-9.621065	-64.94316	286757.6	8935878.9	Pre_flood	1
Apr	2011	MUTUM PARANA	Anopheles darlingi	-9.621065	-64.94316	286757.6	8935878.9	Pre_flood	1
Apr	2011	MUTUM PARANA	Anopheles darlingi	-9.621065	-64.94316	286757.6	8935878.9	Pre_flood	1
Apr	2011	MUTUM PARANA	Anopheles darlingi	-9.621065	-64.94316	286757.6	8935878.9	Pre_flood	1
Apr	2011	MUTUM PARANA	Anopheles darlingi	-9.621065	-64.94316	286757.6	8935878.9	Pre_flood	1
Apr	2011	MUTUM PARANA	Anopheles darlingi	-9.621065	-64.94316	286757.6	8935878.9	Pre_flood	1
Apr	2011	MUTUM PARANA	Anopheles darlingi	-9.621065	-64.94316	286757.6	8935878.9	Pre_flood	1
Apr	2011	MUTUM PARANA	Anopheles darlingi	-9.621065	-64.94316	286757.6	8935878.9	Pre_flood	1
Apr	2011	MUTUM PARANA	Anopheles darlingi	-9.621065	-64.94316	286757.6	8935878.9	Pre_flood	1
Apr	2011	MUTUM PARANA	Anopheles darlingi	-9.621065	-64.94316	286757.6	8935878.9	Pre_flood	1
Apr	2011	MUTUM PARANA	Anopheles darlingi	-9.621065	-64.94316	286757.6	8935878.9	Pre_flood	1
Apr	2011	MUTUM PARANA	Anopheles darlingi	-9.621065	-64.94316	286757.6	8935878.9	Pre_flood	1
Apr	2011	MUTUM PARANA	Anopheles darlingi	-9.621065	-64.94316	286757.6	8935878.9	Pre_flood	1
Apr	2011	MUTUM PARANA	Anopheles darlingi	-9.621065	-64.94316	286757.6	8935878.9	Pre_flood	1
Apr	2011	MUTUM PARANA	Anopheles darlingi	-9.621065	-64.94316	286757.6	8935878.9	Pre_flood	1
Apr	2011	MUTUM PARANA	Anopheles darlingi	-9.621065	-64.94316	286757.6	8935878.9	Pre_flood	1
Apr	2011	BALSA ABUNA	Anopheles darlingi	-9.666732	-65.435894	232692.9	8930479.9	Pre_flood	1
Apr	2011	BALSA ABUNA	Anopheles darlingi	-9.666732	-65.435894	232692.9	8930479.9	Pre_flood	1
Apr	2011	BALSA ABUNA	Anopheles darlingi	-9.666732	-65.435894	232692.9	8930479.9	Pre_flood	1
Apr	2011	BALSA ABUNA	Anopheles darlingi	-9.666732	-65.435894	232692.9	8930479.9	Pre_flood	1
Apr	2011	BALSA ABUNA	Anopheles darlingi	-9.666732	-65.435894	232692.9	8930479.9	Pre_flood	1
Apr	2011	BALSA ABUNA	Anopheles darlingi	-9.666732	-65.435894	232692.9	8930479.9	Pre_flood	1
Apr	2011	BALSA ABUNA	Anopheles darlingi	-9.666732	-65.435894	232692.9	8930479.9	Pre_flood	1
Apr	2011	BALSA ABUNA	Anopheles darlingi	-9.666732	-65.435894	232692.9	8930479.9	Pre_flood	1
Apr	2011	BALSA ABUNA	Anopheles darlingi	-9.666732	-65.435894	232692.9	8930479.9	Pre_flood	1
Apr	2011	BALSA ABUNA	Anopheles darlingi	-9.666732	-65.435894	232692.9	8930479.9	Pre_flood	1
Apr	2011	BALSA ABUNA	Anopheles darlingi	-9.666732	-65.435894	232692.9	8930479.9	Pre_flood	1
Apr	2011	BALSA ABUNA	Anopheles darlingi	-9.666732	-65.435894	232692.9	8930479.9	Pre_flood	1
Apr	2011	BALSA ABUNA	Anopheles darlingi	-9.666732	-65.435894	232692.9	8930479.9	Pre_flood	1
Apr	2011	BALSA ABUNA	Anopheles darlingi	-9.666732	-65.435894	232692.9	8930479.9	Pre_flood	1
Apr	2011	BALSA ABUNA	Anopheles darlingi	-9.666732	-65.435894	232692.9	8930479.9	Pre_flood	1
Apr	2011	BALSA ABUNA	Anopheles darlingi	-9.666732	-65.435894	232692.9	8930479.9	Pre_flood	1
Apr	2011	BALSA ABUNA	Anopheles darlingi	-9.666732	-65.435894	232692.9	8930479.9	Pre_flood	1
Apr	2011	BALSA ABUNA	Anopheles darlingi	-9.666732	-65.435894	232692.9	8930479.9	Pre_flood	1
Apr	2011	BALSA ABUNA	Anopheles darlingi	-9.666732	-65.435894	232692.9	8930479.9	Pre_flood	1
Apr	2011	BALSA ABUNA	Anopheles darlingi	-9.666732	-65.435894	232692.9	8930479.9	Pre_flood	1
Apr	2011	BALSA ABUNA	Anopheles darlingi	-9.666732	-65.435894	232692.9	8930479.9	Pre_flood	1
Apr	2011	BALSA ABUNA	Anopheles darlingi	-9.666732	-65.435894	232692.9	8930479.9	Pre_flood	1
Apr	2011	BALSA ABUNA	Anopheles darlingi	-9.666732	-65.435894	232692.9	8930479.9	Pre_flood	1
Apr	2011	BALSA ABUNA	Anopheles darlingi	-9.666732	-65.435894	232692.9	8930479.9	Pre_flood	1
Apr	2011	BALSA ABUNA	Anopheles darlingi	-9.666732	-65.435894	232692.9	8930479.9	Pre_flood	1
Apr	2011	BALSA ABUNA	Anopheles darlingi	-9.666732	-65.435894	232692.9	8930479.9	Pre_flood	1
Apr	2011	BALSA ABUNA	Anopheles darlingi	-9.666732	-65.435894	232692.9	8930479.9	Pre_flood	1
Apr	2011	BALSA ABUNA	Anopheles darlingi	-9.666732	-65.435894	232692.9	8930479.9	Pre_flood	1
Apr	2011	MUTUM PARANA	Anopheles darlingi	-9.621065	-64.94316	286757.6	8935878.9	Pre_flood	1
Apr	2011	BALSA ABUNA	Anopheles darlingi	-9.666732	-65.435894	232692.9	8930479.9	Pre_flood	1
Apr	2011	BALSA ABUNA	Anopheles darlingi	-9.666732	-65.435894	232692.9	8930479.9	Pre_flood	1
Apr	2011	BALSA ABUNA	Anopheles darlingi	-9.666732	-65.435894	232692.9	8930479.9	Pre_flood	1
Apr	2011	MUTUM PARANA	Anopheles darlingi	-9.621065	-64.94316	286757.6	8935878.9	Pre_flood	1
Apr	2011	MUTUM PARANA	Anopheles darlingi	-9.621065	-64.94316	286757.6	8935878.9	Pre_flood	1
Apr	2011	MUTUM PARANA	Anopheles darlingi	-9.621065	-64.94316	286757.6	8935878.9	Pre_flood	1
Apr	2011	MUTUM PARANA	Anopheles darlingi	-9.621065	-64.94316	286757.6	8935878.9	Pre_flood	1
Apr	2011	MUTUM PARANA	Anopheles darlingi	-9.621065	-64.94316	286757.6	8935878.9	Pre_flood	1
Apr	2011	MUTUM PARANA	Anopheles darlingi	-9.621065	-64.94316	286757.6	8935878.9	Pre_flood	1
Apr	2011	MUTUM PARANA	Anopheles darlingi	-9.621065	-64.94316	286757.6	8935878.9	Pre_flood	1
Apr	2011	MUTUM PARANA	Anopheles darlingi	-9.621065	-64.94316	286757.6	8935878.9	Pre_flood	1
Apr	2011	MUTUM PARANA	Anopheles darlingi	-9.621065	-64.94316	286757.6	8935878.9	Pre_flood	1
Apr	2011	MUTUM PARANA	Anopheles darlingi	-9.621065	-64.94316	286757.6	8935878.9	Pre_flood	1
Apr	2011	MUTUM PARANA	Anopheles darlingi	-9.621065	-64.94316	286757.6	8935878.9	Pre_flood	1
Apr	2011	MUTUM PARANA	Anopheles darlingi	-9.621065	-64.94316	286757.6	8935878.9	Pre_flood	1
Apr	2011	MUTUM PARANA	Anopheles darlingi	-9.621065	-64.94316	286757.6	8935878.9	Pre_flood	1
Apr	2011	MUTUM PARANA	Anopheles darlingi	-9.621065	-64.94316	286757.6	8935878.9	Pre_flood	1
Apr	2011	MUTUM PARANA	Anopheles darlingi	-9.621065	-64.94316	286757.6	8935878.9	Pre_flood	1
Apr	2011	MUTUM PARANA	Anopheles darlingi	-9.621065	-64.94316	286757.6	8935878.9	Pre_flood	1
Apr	2011	MUTUM PARANA	Anopheles darlingi	-9.621065	-64.94316	286757.6	8935878.9	Pre_flood	1
Apr	2011	MUTUM PARANA	Anopheles darlingi	-9.621065	-64.94316	286757.6	8935878.9	Pre_flood	1
Apr	2011	MUTUM PARANA	Anopheles darlingi	-9.621065	-64.94316	286757.6	8935878.9	Pre_flood	1
Apr	2011	MUTUM PARANA	Anopheles darlingi	-9.621065	-64.94316	286757.6	8935878.9	Pre_flood	1
Apr	2011	MUTUM PARANA	Anopheles darlingi	-9.621065	-64.94316	286757.6	8935878.9	Pre_flood	1
Apr	2011	MUTUM PARANA	Anopheles darlingi	-9.621065	-64.94316	286757.6	8935878.9	Pre_flood	1
Apr	2011	JACI PARANA	Anopheles darlingi	-9.259651	-64.395767	346682.2	8976140.8	Pre_flood	1
Apr	2011	JACI PARANA	Anopheles darlingi	-9.259651	-64.395767	346682.2	8976140.8	Pre_flood	1
Apr	2011	JACI PARANA	Anopheles darlingi	-9.259651	-64.395767	346682.2	8976140.8	Pre_flood	1
Apr	2011	JACI PARANA	Anopheles darlingi	-9.259651	-64.395767	346682.2	8976140.8	Pre_flood	1
Apr	2011	JACI PARANA	Anopheles darlingi	-9.259651	-64.395767	346682.2	8976140.8	Pre_flood	1
Apr	2011	JACI PARANA	Anopheles darlingi	-9.259651	-64.395767	346682.2	8976140.8	Pre_flood	1
Apr	2011	JACI PARANA	Anopheles darlingi	-9.259651	-64.395767	346682.2	8976140.8	Pre_flood	1
Apr	2011	JACI PARANA	Anopheles darlingi	-9.259651	-64.395767	346682.2	8976140.8	Pre_flood	1
Apr	2011	JACI PARANA	Anopheles darlingi	-9.259651	-64.395767	346682.2	8976140.8	Pre_flood	1
Apr	2011	JACI PARANA	Anopheles darlingi	-9.259651	-64.395767	346682.2	8976140.8	Pre_flood	1
Apr	2011	JACI PARANA	Anopheles darlingi	-9.259651	-64.395767	346682.2	8976140.8	Pre_flood	1
Apr	2011	JACI PARANA	Anopheles darlingi	-9.259651	-64.395767	346682.2	8976140.8	Pre_flood	1
Apr	2011	JACI PARANA	Anopheles darlingi	-9.259651	-64.395767	346682.2	8976140.8	Pre_flood	1
Apr	2011	JACI PARANA	Anopheles darlingi	-9.259651	-64.395767	346682.2	8976140.8	Pre_flood	1
Apr	2011	JACI PARANA	Anopheles darlingi	-9.259651	-64.395767	346682.2	8976140.8	Pre_flood	1
Apr	2011	JACI PARANA	Anopheles darlingi	-9.259651	-64.395767	346682.2	8976140.8	Pre_flood	1
Apr	2011	JACI PARANA	Anopheles darlingi	-9.259651	-64.395767	346682.2	8976140.8	Pre_flood	1
Apr	2011	JACI PARANA	Anopheles darlingi	-9.259651	-64.395767	346682.2	8976140.8	Pre_flood	1
Apr	2011	JACI PARANA	Anopheles darlingi	-9.259651	-64.395767	346682.2	8976140.8	Pre_flood	1
Apr	2011	MUTUM PARANA	Anopheles darlingi	-9.621065	-64.94316	286757.6	8935878.9	Pre_flood	1
Apr	2011	MUTUM PARANA	Anopheles darlingi	-9.621065	-64.94316	286757.6	8935878.9	Pre_flood	1
Apr	2011	JACI PARANA	Anopheles darlingi	-9.259651	-64.395767	346682.2	8976140.8	Pre_flood	1
Apr	2011	JACI PARANA	Anopheles darlingi	-9.259651	-64.395767	346682.2	8976140.8	Pre_flood	1
Apr	2011	JACI PARANA	Anopheles darlingi	-9.259651	-64.395767	346682.2	8976140.8	Pre_flood	1
Apr	2011	VILA ABUNA	Anopheles darlingi	-9.676714	-65.401688	239952.3	8958283.7	Pre_flood	1
Apr	2011	JACI PARANA	Anopheles darlingi	-9.259651	-64.395767	346682.2	8976140.8	Pre_flood	1
Apr	2011	JACI PARANA	Anopheles darlingi	-9.259651	-64.395767	346682.2	8976140.8	Pre_flood	1
Apr	2011	JACI PARANA	Anopheles darlingi	-9.259651	-64.395767	346682.2	8976140.8	Pre_flood	1
Apr	2011	JACI PARANA	Anopheles darlingi	-9.259651	-64.395767	346682.2	8976140.8	Pre_flood	1
Apr	2011	JACI PARANA	Anopheles darlingi	-9.259651	-64.395767	346682.2	8976140.8	Pre_flood	1
Apr	2011	JACI PARANA	Anopheles darlingi	-9.259651	-64.395767	346682.2	8976140.8	Pre_flood	1
Apr	2011	JACI PARANA	Anopheles darlingi	-9.259651	-64.395767	346682.2	8976140.8	Pre_flood	1
Apr	2011	JACI PARANA	Anopheles darlingi	-9.259651	-64.395767	346682.2	8976140.8	Pre_flood	1
Apr	2011	JACI PARANA	Anopheles darlingi	-9.259651	-64.395767	346682.2	8976140.8	Pre_flood	1
Apr	2011	JACI PARANA	Anopheles darlingi	-9.259651	-64.395767	346682.2	8976140.8	Pre_flood	1
Apr	2011	JACI PARANA	Anopheles darlingi	-9.259651	-64.395767	346682.2	8976140.8	Pre_flood	1
Apr	2011	JACI PARANA	Anopheles darlingi	-9.259651	-64.395767	346682.2	8976140.8	Pre_flood	1
Apr	2011	JACI PARANA	Anopheles darlingi	-9.259651	-64.395767	346682.2	8976140.8	Pre_flood	1
Apr	2011	JACI PARANA	Anopheles darlingi	-9.259651	-64.395767	346682.2	8976140.8	Pre_flood	1
Apr	2011	JACI PARANA	Anopheles darlingi	-9.259651	-64.395767	346682.2	8976140.8	Pre_flood	1
Apr	2011	MUTUM PARANA	Anopheles darlingi	-9.621065	-64.94316	286757.6	8935878.9	Pre_flood	1
Apr	2011	JACI PARANA	Anopheles darlingi	-9.259651	-64.395767	346682.2	8976140.8	Pre_flood	1
Apr	2011	VILA ABUNA	Anopheles braziliensis	-9.676714	-65.401688	239952.3	8958283.7	Pre_flood	1
Apr	2011	VILA ABUNA	Anopheles braziliensis	-9.676714	-65.401688	239952.3	8958283.7	Pre_flood	1
Apr	2011	VILA ABUNA	Anopheles braziliensis	-9.676714	-65.401688	239952.3	8958283.7	Pre_flood	1
Apr	2011	VILA ABUNA	Anopheles darlingi	-9.676714	-65.401688	239952.3	8958283.7	Pre_flood	1
Apr	2011	VILA ABUNA	Anopheles darlingi	-9.676714	-65.401688	239952.3	8958283.7	Pre_flood	1
Apr	2011	VILA ABUNA	Anopheles darlingi	-9.676714	-65.401688	239952.3	8958283.7	Pre_flood	1
Apr	2011	VILA ABUNA	Anopheles darlingi	-9.676714	-65.401688	239952.3	8958283.7	Pre_flood	1
Apr	2011	VILA ABUNA	Anopheles darlingi	-9.676714	-65.401688	239952.3	8958283.7	Pre_flood	1
Apr	2011	VILA ABUNA	Anopheles darlingi	-9.676714	-65.401688	239952.3	8958283.7	Pre_flood	1
Apr	2011	VILA ABUNA	Anopheles darlingi	-9.676714	-65.401688	239952.3	8958283.7	Pre_flood	1
Apr	2011	VILA ABUNA	Anopheles darlingi	-9.676714	-65.401688	239952.3	8958283.7	Pre_flood	1
Apr	2011	VILA ABUNA	Anopheles darlingi	-9.676714	-65.401688	239952.3	8958283.7	Pre_flood	1
Apr	2011	VILA ABUNA	Anopheles darlingi	-9.676714	-65.401688	239952.3	8958283.7	Pre_flood	1
Apr	2011	VILA ABUNA	Anopheles darlingi	-9.676714	-65.401688	239952.3	8958283.7	Pre_flood	1
Apr	2011	VILA ABUNA	Anopheles darlingi	-9.676714	-65.401688	239952.3	8958283.7	Pre_flood	1
Apr	2011	VILA ABUNA	Anopheles darlingi	-9.676714	-65.401688	239952.3	8958283.7	Pre_flood	1
Apr	2011	VILA ABUNA	Anopheles darlingi	-9.676714	-65.401688	239952.3	8958283.7	Pre_flood	1
Apr	2011	VILA ABUNA	Anopheles darlingi	-9.676714	-65.401688	239952.3	8958283.7	Pre_flood	1
Apr	2011	VILA ABUNA	Anopheles darlingi	-9.676714	-65.401688	239952.3	8958283.7	Pre_flood	1
Apr	2011	VILA ABUNA	Anopheles darlingi	-9.676714	-65.401688	239952.3	8958283.7	Pre_flood	1
Apr	2011	VILA ABUNA	Anopheles darlingi	-9.676714	-65.401688	239952.3	8958283.7	Pre_flood	1
Apr	2011	VILA ABUNA	Anopheles darlingi	-9.676714	-65.401688	239952.3	8958283.7	Pre_flood	1
Apr	2011	JACI PARANA	Anopheles darlingi	-9.259651	-64.395767	346682.2	8976140.8	Pre_flood	1
Apr	2011	JACI PARANA	Anopheles darlingi	-9.259651	-64.395767	346682.2	8976140.8	Pre_flood	1
Apr	2011	JACI PARANA	Anopheles darlingi	-9.259651	-64.395767	346682.2	8976140.8	Pre_flood	1
Apr	2011	VILA ABUNA	Anopheles darlingi	-9.676714	-65.401688	239952.3	8958283.7	Pre_flood	1
Apr	2011	JACI PARANA	Anopheles darlingi	-9.259651	-64.395767	346682.2	8976140.8	Pre_flood	1
Apr	2011	JACI PARANA	Anopheles darlingi	-9.259651	-64.395767	346682.2	8976140.8	Pre_flood	1
Apr	2011	MUTUM PARANA	Anopheles darlingi	-9.621065	-64.94316	286757.6	8935878.9	Pre_flood	1
Apr	2011	MUTUM PARANA	Anopheles darlingi	-9.621065	-64.94316	286757.6	8935878.9	Pre_flood	1
Apr	2011	JACI PARANA	Anopheles darlingi	-9.259651	-64.395767	346682.2	8976140.8	Pre_flood	1
Apr	2011	MUTUM PARANA	Anopheles darlingi	-9.621065	-64.94316	286757.6	8935878.9	Pre_flood	1
Apr	2011	MUTUM PARANA	Anopheles darlingi	-9.621065	-64.94316	286757.6	8935878.9	Pre_flood	1
Apr	2011	MUTUM PARANA	Anopheles darlingi	-9.621065	-64.94316	286757.6	8935878.9	Pre_flood	1
Apr	2011	MUTUM PARANA	Anopheles darlingi	-9.621065	-64.94316	286757.6	8935878.9	Pre_flood	1
Apr	2011	MUTUM PARANA	Anopheles darlingi	-9.621065	-64.94316	286757.6	8935878.9	Pre_flood	1
Apr	2011	VILA ABUNA	Anopheles braziliensis	-9.676714	-65.401688	239952.3	8958283.7	Pre_flood	1
Apr	2011	MUTUM PARANA	Anopheles darlingi	-9.621065	-64.94316	286757.6	8935878.9	Pre_flood	1
Apr	2011	MUTUM PARANA	Anopheles darlingi	-9.621065	-64.94316	286757.6	8935878.9	Pre_flood	1
Apr	2011	MUTUM PARANA	Anopheles darlingi	-9.621065	-64.94316	286757.6	8935878.9	Pre_flood	1
Apr	2011	MUTUM PARANA	Anopheles darlingi	-9.621065	-64.94316	286757.6	8935878.9	Pre_flood	1
Apr	2011	MUTUM PARANA	Anopheles darlingi	-9.621065	-64.94316	286757.6	8935878.9	Pre_flood	1
Apr	2011	MUTUM PARANA	Anopheles darlingi	-9.621065	-64.94316	286757.6	8935878.9	Pre_flood	1
Apr	2011	VILA ABUNA	Anopheles darlingi	-9.676714	-65.401688	239952.3	8958283.7	Pre_flood	1
Apr	2011	MUTUM PARANA	Anopheles darlingi	-9.621065	-64.94316	286757.6	8935878.9	Pre_flood	1
Apr	2011	VILA ABUNA	Anopheles braziliensis	-9.676714	-65.401688	239952.3	8958283.7	Pre_flood	1
Apr	2011	JACI PARANA	Anopheles darlingi	-9.259651	-64.395767	346682.2	8976140.8	Pre_flood	1
Apr	2011	JACI PARANA	Anopheles darlingi	-9.259651	-64.395767	346682.2	8976140.8	Pre_flood	1
Apr	2011	JACI PARANA	Anopheles darlingi	-9.259651	-64.395767	346682.2	8976140.8	Pre_flood	1
Apr	2011	JACI PARANA	Anopheles darlingi	-9.259651	-64.395767	346682.2	8976140.8	Pre_flood	1
Apr	2011	JACI PARANA	Anopheles darlingi	-9.259651	-64.395767	346682.2	8976140.8	Pre_flood	1
Apr	2011	JACI PARANA	Anopheles darlingi	-9.259651	-64.395767	346682.2	8976140.8	Pre_flood	1
Apr	2011	VILA ABUNA	Anopheles darlingi	-9.676714	-65.401688	239952.3	8958283.7	Pre_flood	1
Apr	2011	VILA ABUNA	Anopheles darlingi	-9.676714	-65.401688	239952.3	8958283.7	Pre_flood	1
Apr	2011	VILA ABUNA	Anopheles darlingi	-9.676714	-65.401688	239952.3	8958283.7	Pre_flood	1
Apr	2011	VILA ABUNA	Anopheles darlingi	-9.676714	-65.401688	239952.3	8958283.7	Pre_flood	1
Apr	2011	VILA ABUNA	Anopheles darlingi	-9.676714	-65.401688	239952.3	8958283.7	Pre_flood	1
Apr	2011	VILA ABUNA	Anopheles darlingi	-9.676714	-65.401688	239952.3	8958283.7	Pre_flood	1
Apr	2011	VILA ABUNA	Anopheles darlingi	-9.676714	-65.401688	239952.3	8958283.7	Pre_flood	1
Apr	2011	JACI PARANA	Anopheles darlingi	-9.259651	-64.395767	346682.2	8976140.8	Pre_flood	1
Apr	2011	JACI PARANA	Anopheles darlingi	-9.259651	-64.395767	346682.2	8976140.8	Pre_flood	1
Apr	2011	JACI PARANA	Anopheles darlingi	-9.259651	-64.395767	346682.2	8976140.8	Pre_flood	1
Apr	2011	MUTUM PARANA	Anopheles darlingi	-9.621065	-64.94316	286757.6	8935878.9	Pre_flood	1
Apr	2011	MUTUM PARANA	Anopheles darlingi	-9.621065	-64.94316	286757.6	8935878.9	Pre_flood	1
Apr	2011	MUTUM PARANA	Anopheles darlingi	-9.621065	-64.94316	286757.6	8935878.9	Pre_flood	1
Apr	2011	JACI PARANA	Anopheles darlingi	-9.259651	-64.395767	346682.2	8976140.8	Pre_flood	1
Apr	2011	JACI PARANA	Anopheles darlingi	-9.259651	-64.395767	346682.2	8976140.8	Pre_flood	1
Apr	2011	JACI PARANA	Anopheles darlingi	-9.259651	-64.395767	346682.2	8976140.8	Pre_flood	1
Apr	2011	MUTUM PARANA	Anopheles darlingi	-9.621065	-64.94316	286757.6	8935878.9	Pre_flood	1
Apr	2011	JACI PARANA	Anopheles darlingi	-9.259651	-64.395767	346682.2	8976140.8	Pre_flood	1
Apr	2011	JACI PARANA	Anopheles darlingi	-9.259651	-64.395767	346682.2	8976140.8	Pre_flood	1
Apr	2011	JACI PARANA	Anopheles darlingi	-9.259651	-64.395767	346682.2	8976140.8	Pre_flood	1
Apr	2011	JACI PARANA	Anopheles darlingi	-9.259651	-64.395767	346682.2	8976140.8	Pre_flood	1
Apr	2011	VILA ABUNA	Anopheles braziliensis	-9.676714	-65.401688	239952.3	8958283.7	Pre_flood	1
Apr	2011	VILA ABUNA	Anopheles braziliensis	-9.676714	-65.401688	239952.3	8958283.7	Pre_flood	1
Apr	2011	VILA ABUNA	Anopheles braziliensis	-9.676714	-65.401688	239952.3	8958283.7	Pre_flood	1
Apr	2011	VILA ABUNA	Anopheles braziliensis	-9.676714	-65.401688	239952.3	8958283.7	Pre_flood	1
Apr	2011	JACI PARANA	Anopheles darlingi	-9.259651	-64.395767	346682.2	8976140.8	Pre_flood	1
Apr	2011	VILA ABUNA	Anopheles darlingi	-9.676714	-65.401688	239952.3	8958283.7	Pre_flood	1
Apr	2011	VILA ABUNA	Anopheles darlingi	-9.676714	-65.401688	239952.3	8958283.7	Pre_flood	1
Apr	2011	JACI PARANA	Anopheles darlingi	-9.259651	-64.395767	346682.2	8976140.8	Pre_flood	1
Apr	2011	JACI PARANA	Anopheles darlingi	-9.259651	-64.395767	346682.2	8976140.8	Pre_flood	1
Apr	2011	JACI PARANA	Anopheles darlingi	-9.259651	-64.395767	346682.2	8976140.8	Pre_flood	1
Apr	2011	VILA ABUNA	Anopheles braziliensis	-9.676714	-65.401688	239952.3	8958283.7	Pre_flood	1
Apr	2011	VILA ABUNA	Anopheles triannulatus	-9.676714	-65.401688	239952.3	8958283.7	Pre_flood	1
Apr	2011	JACI PARANA	Anopheles darlingi	-9.259651	-64.395767	346682.2	8976140.8	Pre_flood	1
Apr	2011	VILA ABUNA	Anopheles braziliensis	-9.676714	-65.401688	239952.3	8958283.7	Pre_flood	1
Apr	2011	VILA ABUNA	Anopheles braziliensis	-9.676714	-65.401688	239952.3	8958283.7	Pre_flood	1
Apr	2011	JACI PARANA	Anopheles darlingi	-9.259651	-64.395767	346682.2	8976140.8	Pre_flood	1
Apr	2011	VILA ABUNA	Anopheles braziliensis	-9.676714	-65.401688	239952.3	8958283.7	Pre_flood	1
Apr	2011	VILA ABUNA	Anopheles braziliensis	-9.676714	-65.401688	239952.3	8958283.7	Pre_flood	1
Apr	2011	VILA ABUNA	Anopheles braziliensis	-9.676714	-65.401688	239952.3	8958283.7	Pre_flood	1
Apr	2011	VILA ABUNA	Anopheles braziliensis	-9.676714	-65.401688	239952.3	8958283.7	Pre_flood	1
Apr	2011	JACI PARANA	Anopheles darlingi	-9.259651	-64.395767	346682.2	8976140.8	Pre_flood	1
Apr	2011	JACI PARANA	Anopheles darlingi	-9.259651	-64.395767	346682.2	8976140.8	Pre_flood	1
Apr	2011	JACI PARANA	Anopheles darlingi	-9.259651	-64.395767	346682.2	8976140.8	Pre_flood	1
Apr	2011	MUTUM PARANA	Anopheles darlingi	-9.621065	-64.94316	286757.6	8935878.9	Pre_flood	1
Apr	2011	VILA ABUNA	Anopheles braziliensis	-9.676714	-65.401688	239952.3	8958283.7	Pre_flood	1
Apr	2011	VILA ABUNA	Anopheles braziliensis	-9.676714	-65.401688	239952.3	8958283.7	Pre_flood	1
Apr	2011	JACI PARANA	Anopheles darlingi	-9.259651	-64.395767	346682.2	8976140.8	Pre_flood	1
Apr	2011	JACI PARANA	Anopheles darlingi	-9.259651	-64.395767	346682.2	8976140.8	Pre_flood	1
Apr	2011	JACI PARANA	Anopheles darlingi	-9.259651	-64.395767	346682.2	8976140.8	Pre_flood	1
Apr	2011	MUTUM PARANA	Anopheles darlingi	-9.621065	-64.94316	286757.6	8935878.9	Pre_flood	1
Apr	2011	JACI PARANA	Anopheles darlingi	-9.259651	-64.395767	346682.2	8976140.8	Pre_flood	1
Apr	2011	MUTUM PARANA	Anopheles darlingi	-9.621065	-64.94316	286757.6	8935878.9	Pre_flood	1
Apr	2011	VILA ABUNA	Anopheles braziliensis	-9.676714	-65.401688	239952.3	8958283.7	Pre_flood	1
Apr	2011	JACI PARANA	Anopheles darlingi	-9.259651	-64.395767	346682.2	8976140.8	Pre_flood	1
Apr	2011	MUTUM PARANA	Anopheles darlingi	-9.621065	-64.94316	286757.6	8935878.9	Pre_flood	1
Apr	2011	VILA ABUNA	Anopheles braziliensis	-9.676714	-65.401688	239952.3	8958283.7	Pre_flood	1
Apr	2011	VILA ABUNA	Anopheles braziliensis	-9.676714	-65.401688	239952.3	8958283.7	Pre_flood	1
Apr	2011	VILA ABUNA	Anopheles braziliensis	-9.676714	-65.401688	239952.3	8958283.7	Pre_flood	1
Apr	2011	VILA ABUNA	Anopheles braziliensis	-9.676714	-65.401688	239952.3	8958283.7	Pre_flood	1
Apr	2012	MUTUM PARANA	Anopheles darlingi	-9.621065	-64.94316	286757.6	8935878.9	Pre_flood	1
Apr	2012	MUTUM PARANA	Anopheles darlingi	-9.621065	-64.94316	286757.6	8935878.9	Pre_flood	1
Apr	2012	MUTUM PARANA	Anopheles darlingi	-9.621065	-64.94316	286757.6	8935878.9	Pre_flood	1
Apr	2012	MUTUM PARANA	Anopheles darlingi	-9.621065	-64.94316	286757.6	8935878.9	Pre_flood	1
Apr	2012	MUTUM PARANA	Anopheles darlingi	-9.621065	-64.94316	286757.6	8935878.9	Pre_flood	1
Apr	2012	MUTUM PARANA	Anopheles darlingi	-9.621065	-64.94316	286757.6	8935878.9	Pre_flood	1
Apr	2012	MUTUM PARANA	Anopheles darlingi	-9.621065	-64.94316	286757.6	8935878.9	Pre_flood	1
Apr	2012	MUTUM PARANA	Anopheles darlingi	-9.621065	-64.94316	286757.6	8935878.9	Pre_flood	1
Apr	2012	MUTUM PARANA	Anopheles darlingi	-9.621065	-64.94316	286757.6	8935878.9	Pre_flood	1
Apr	2012	MUTUM PARANA	Anopheles darlingi	-9.621065	-64.94316	286757.6	8935878.9	Pre_flood	1
Apr	2012	VILA ABUNA	Anopheles braziliensis	-9.676714	-65.401688	239952.3	8958283.7	Pre_flood	1
Apr	2012	VILA ABUNA	Anopheles braziliensis	-9.676714	-65.401688	239952.3	8958283.7	Pre_flood	1
Apr	2012	VILA ABUNA	Anopheles darlingi	-9.676714	-65.401688	239952.3	8958283.7	Pre_flood	1
Apr	2012	VILA ABUNA	Anopheles darlingi	-9.676714	-65.401688	239952.3	8958283.7	Pre_flood	1
Apr	2012	VILA ABUNA	Anopheles darlingi	-9.676714	-65.401688	239952.3	8958283.7	Pre_flood	1
Apr	2012	VILA ABUNA	Anopheles deaneorum	-9.676714	-65.401688	239952.3	8958283.7	Pre_flood	1
Apr	2012	JACI PARANA	Anopheles darlingi	-9.259651	-64.395767	346682.2	8976140.8	Pre_flood	1
Apr	2012	JACI PARANA	Anopheles darlingi	-9.259651	-64.395767	346682.2	8976140.8	Pre_flood	1
Apr	2012	JACI PARANA	Anopheles darlingi	-9.259651	-64.395767	346682.2	8976140.8	Pre_flood	1
Apr	2012	JACI PARANA	Anopheles darlingi	-9.259651	-64.395767	346682.2	8976140.8	Pre_flood	1
Apr	2012	JACI PARANA	Anopheles darlingi	-9.259651	-64.395767	346682.2	8976140.8	Pre_flood	1
Apr	2012	JACI PARANA	Anopheles darlingi	-9.259651	-64.395767	346682.2	8976140.8	Pre_flood	1
Apr	2012	JACI PARANA	Anopheles darlingi	-9.259651	-64.395767	346682.2	8976140.8	Pre_flood	1
Apr	2012	JACI PARANA	Anopheles darlingi	-9.259651	-64.395767	346682.2	8976140.8	Pre_flood	1
Apr	2012	JACI PARANA	Anopheles darlingi	-9.259651	-64.395767	346682.2	8976140.8	Pre_flood	1
Apr	2012	BALSA ABUNA	Anopheles darlingi	-9.666732	-65.435894	232692.9	8930479.9	Pre_flood	1
Apr	2012	BALSA ABUNA	Anopheles darlingi	-9.666732	-65.435894	232692.9	8930479.9	Pre_flood	1
Apr	2012	BALSA ABUNA	Anopheles darlingi	-9.666732	-65.435894	232692.9	8930479.9	Pre_flood	1
Apr	2012	BALSA ABUNA	Anopheles darlingi	-9.666732	-65.435894	232692.9	8930479.9	Pre_flood	1
Apr	2012	POLIGONAL MARGEM ESQUERDA	Anopheles darlingi	-9.229662	-64.65125	318596.5	8979337.5	Pre_flood	1
Apr	2012	POLIGONAL MARGEM ESQUERDA	Anopheles darlingi	-9.229662	-64.65125	318596.5	8979337.5	Pre_flood	1
Apr	2012	POLIGONAL MARGEM ESQUERDA	Anopheles darlingi	-9.229662	-64.65125	318596.5	8979337.5	Pre_flood	1
Apr	2012	POLIGONAL MARGEM ESQUERDA	Anopheles darlingi	-9.229662	-64.65125	318596.5	8979337.5	Pre_flood	1
Apr	2012	POLIGONAL MARGEM ESQUERDA	Anopheles darlingi	-9.229662	-64.65125	318596.5	8979337.5	Pre_flood	1
Apr	2012	POLIGONAL MARGEM ESQUERDA	Anopheles darlingi	-9.229662	-64.65125	318596.5	8979337.5	Pre_flood	1
Apr	2012	POLIGONAL MARGEM ESQUERDA	Anopheles darlingi	-9.229662	-64.65125	318596.5	8979337.5	Pre_flood	1
Apr	2012	POLIGONAL MARGEM ESQUERDA	Anopheles darlingi	-9.229662	-64.65125	318596.5	8979337.5	Pre_flood	1
Apr	2012	JACI PARANA	Anopheles darlingi	-9.259651	-64.395767	346682.2	8976140.8	Pre_flood	1
Apr	2012	JACI PARANA	Anopheles darlingi	-9.259651	-64.395767	346682.2	8976140.8	Pre_flood	1
Apr	2012	JACI PARANA	Anopheles darlingi	-9.259651	-64.395767	346682.2	8976140.8	Pre_flood	1
Apr	2012	BALSA ABUNA	Anopheles darlingi	-9.666732	-65.435894	232692.9	8930479.9	Pre_flood	1
Apr	2012	BALSA ABUNA	Anopheles darlingi	-9.666732	-65.435894	232692.9	8930479.9	Pre_flood	1
Apr	2012	BALSA ABUNA	Anopheles darlingi	-9.666732	-65.435894	232692.9	8930479.9	Pre_flood	1
Apr	2012	BALSA ABUNA	Anopheles darlingi	-9.666732	-65.435894	232692.9	8930479.9	Pre_flood	1
Apr	2012	BALSA ABUNA	Anopheles darlingi	-9.666732	-65.435894	232692.9	8930479.9	Pre_flood	1
Apr	2012	BALSA ABUNA	Anopheles darlingi	-9.666732	-65.435894	232692.9	8930479.9	Pre_flood	1
Apr	2012	BALSA ABUNA	Anopheles darlingi	-9.666732	-65.435894	232692.9	8930479.9	Pre_flood	1
Apr	2012	BALSA ABUNA	Anopheles darlingi	-9.666732	-65.435894	232692.9	8930479.9	Pre_flood	1
Apr	2012	BALSA ABUNA	Anopheles darlingi	-9.666732	-65.435894	232692.9	8930479.9	Pre_flood	1
Apr	2012	JACI PARANA	Anopheles darlingi	-9.259651	-64.395767	346682.2	8976140.8	Pre_flood	1
Apr	2012	JACI PARANA	Anopheles darlingi	-9.259651	-64.395767	346682.2	8976140.8	Pre_flood	1
Apr	2012	JACI PARANA	Anopheles darlingi	-9.259651	-64.395767	346682.2	8976140.8	Pre_flood	1
Apr	2012	BALSA ABUNA	Anopheles darlingi	-9.666732	-65.435894	232692.9	8930479.9	Pre_flood	1
Apr	2012	BALSA ABUNA	Anopheles darlingi	-9.666732	-65.435894	232692.9	8930479.9	Pre_flood	1
Apr	2012	BALSA ABUNA	Anopheles darlingi	-9.666732	-65.435894	232692.9	8930479.9	Pre_flood	1
Apr	2012	BALSA ABUNA	Anopheles darlingi	-9.666732	-65.435894	232692.9	8930479.9	Pre_flood	1
Apr	2012	BALSA ABUNA	Anopheles darlingi	-9.666732	-65.435894	232692.9	8930479.9	Pre_flood	1
Apr	2012	BALSA ABUNA	Anopheles darlingi	-9.666732	-65.435894	232692.9	8930479.9	Pre_flood	1
Apr	2012	BALSA ABUNA	Anopheles darlingi	-9.666732	-65.435894	232692.9	8930479.9	Pre_flood	1
Apr	2012	BALSA ABUNA	Anopheles darlingi	-9.666732	-65.435894	232692.9	8930479.9	Pre_flood	1
Apr	2012	BALSA ABUNA	Anopheles darlingi	-9.666732	-65.435894	232692.9	8930479.9	Pre_flood	1
Apr	2012	BALSA ABUNA	Anopheles darlingi	-9.666732	-65.435894	232692.9	8930479.9	Pre_flood	1
Apr	2012	BALSA ABUNA	Anopheles darlingi	-9.666732	-65.435894	232692.9	8930479.9	Pre_flood	1
Apr	2012	BALSA ABUNA	Anopheles darlingi	-9.666732	-65.435894	232692.9	8930479.9	Pre_flood	1
Apr	2012	BALSA ABUNA	Anopheles darlingi	-9.666732	-65.435894	232692.9	8930479.9	Pre_flood	1
Apr	2012	BALSA ABUNA	Anopheles darlingi	-9.666732	-65.435894	232692.9	8930479.9	Pre_flood	1
Apr	2012	BALSA ABUNA	Anopheles darlingi	-9.666732	-65.435894	232692.9	8930479.9	Pre_flood	1
Apr	2012	BALSA ABUNA	Anopheles darlingi	-9.666732	-65.435894	232692.9	8930479.9	Pre_flood	1
Apr	2012	BALSA ABUNA	Anopheles darlingi	-9.666732	-65.435894	232692.9	8930479.9	Pre_flood	1
Apr	2012	BALSA ABUNA	Anopheles darlingi	-9.666732	-65.435894	232692.9	8930479.9	Pre_flood	1
Apr	2012	BALSA ABUNA	Anopheles darlingi	-9.666732	-65.435894	232692.9	8930479.9	Pre_flood	1
Apr	2012	BALSA ABUNA	Anopheles darlingi	-9.666732	-65.435894	232692.9	8930479.9	Pre_flood	1
Apr	2012	BALSA ABUNA	Anopheles darlingi	-9.666732	-65.435894	232692.9	8930479.9	Pre_flood	1
Apr	2012	BALSA ABUNA	Anopheles darlingi	-9.666732	-65.435894	232692.9	8930479.9	Pre_flood	1
Apr	2012	BALSA ABUNA	Anopheles darlingi	-9.666732	-65.435894	232692.9	8930479.9	Pre_flood	1
Apr	2012	BALSA ABUNA	Anopheles darlingi	-9.666732	-65.435894	232692.9	8930479.9	Pre_flood	1
Apr	2012	BALSA ABUNA	Anopheles darlingi	-9.666732	-65.435894	232692.9	8930479.9	Pre_flood	1
Apr	2012	BALSA ABUNA	Anopheles darlingi	-9.666732	-65.435894	232692.9	8930479.9	Pre_flood	1
Apr	2012	BALSA ABUNA	Anopheles darlingi	-9.666732	-65.435894	232692.9	8930479.9	Pre_flood	1
Apr	2012	BALSA ABUNA	Anopheles darlingi	-9.666732	-65.435894	232692.9	8930479.9	Pre_flood	1
Apr	2012	BALSA ABUNA	Anopheles darlingi	-9.666732	-65.435894	232692.9	8930479.9	Pre_flood	1
Apr	2012	BALSA ABUNA	Anopheles darlingi	-9.666732	-65.435894	232692.9	8930479.9	Pre_flood	1
Apr	2012	BALSA ABUNA	Anopheles darlingi	-9.666732	-65.435894	232692.9	8930479.9	Pre_flood	1
Apr	2012	BALSA ABUNA	Anopheles darlingi	-9.666732	-65.435894	232692.9	8930479.9	Pre_flood	1
Apr	2012	BALSA ABUNA	Anopheles darlingi	-9.666732	-65.435894	232692.9	8930479.9	Pre_flood	1
Apr	2012	BALSA ABUNA	Anopheles darlingi	-9.666732	-65.435894	232692.9	8930479.9	Pre_flood	1
Apr	2012	BALSA ABUNA	Anopheles darlingi	-9.666732	-65.435894	232692.9	8930479.9	Pre_flood	1
Apr	2012	BALSA ABUNA	Anopheles darlingi	-9.666732	-65.435894	232692.9	8930479.9	Pre_flood	1
Apr	2012	BALSA ABUNA	Anopheles darlingi	-9.666732	-65.435894	232692.9	8930479.9	Pre_flood	1
Apr	2012	BALSA ABUNA	Anopheles darlingi	-9.666732	-65.435894	232692.9	8930479.9	Pre_flood	1
Apr	2012	BALSA ABUNA	Anopheles darlingi	-9.666732	-65.435894	232692.9	8930479.9	Pre_flood	1
Apr	2012	BALSA ABUNA	Anopheles darlingi	-9.666732	-65.435894	232692.9	8930479.9	Pre_flood	1
Apr	2012	BALSA ABUNA	Anopheles darlingi	-9.666732	-65.435894	232692.9	8930479.9	Pre_flood	1
Apr	2012	BALSA ABUNA	Anopheles darlingi	-9.666732	-65.435894	232692.9	8930479.9	Pre_flood	1
Apr	2012	BALSA ABUNA	Anopheles darlingi	-9.666732	-65.435894	232692.9	8930479.9	Pre_flood	1
Apr	2012	BALSA ABUNA	Anopheles darlingi	-9.666732	-65.435894	232692.9	8930479.9	Pre_flood	1
Apr	2012	BALSA ABUNA	Anopheles darlingi	-9.666732	-65.435894	232692.9	8930479.9	Pre_flood	1
Apr	2012	BALSA ABUNA	Anopheles deaneorum	-9.666732	-65.435894	232692.9	8930479.9	Pre_flood	1
Apr	2012	POLIGONAL MARGEM DIREITA	Anopheles darlingi	-9.245362	-64.613768	322723.1	8977619.9	Pre_flood	1
Apr	2012	POLIGONAL MARGEM DIREITA	Anopheles darlingi	-9.245362	-64.613768	322723.1	8977619.9	Pre_flood	1
Apr	2012	POLIGONAL MARGEM DIREITA	Anopheles darlingi	-9.245362	-64.613768	322723.1	8977619.9	Pre_flood	1
Apr	2012	POLIGONAL MARGEM DIREITA	Anopheles mattogrossensis	-9.245362	-64.613768	322723.1	8977619.9	Pre_flood	1
Apr	2012	POLIGONAL MARGEM DIREITA	Anopheles darlingi	-9.245362	-64.613768	322723.1	8977619.9	Pre_flood	1
Apr	2012	POLIGONAL MARGEM DIREITA	Anopheles darlingi	-9.245362	-64.613768	322723.1	8977619.9	Pre_flood	1
Apr	2012	BALSA ABUNA	Anopheles darlingi	-9.666732	-65.435894	232692.9	8930479.9	Pre_flood	1
Apr	2012	BALSA ABUNA	Anopheles darlingi	-9.666732	-65.435894	232692.9	8930479.9	Pre_flood	1
Apr	2012	BALSA ABUNA	Anopheles darlingi	-9.666732	-65.435894	232692.9	8930479.9	Pre_flood	1
Apr	2012	BALSA ABUNA	Anopheles darlingi	-9.666732	-65.435894	232692.9	8930479.9	Pre_flood	1
Apr	2012	BALSA ABUNA	Anopheles darlingi	-9.666732	-65.435894	232692.9	8930479.9	Pre_flood	1
Apr	2012	JACI PARANA	Anopheles darlingi	-9.259651	-64.395767	346682.2	8976140.8	Pre_flood	1
Apr	2012	BALSA ABUNA	Anopheles darlingi	-9.666732	-65.435894	232692.9	8930479.9	Pre_flood	1
Apr	2012	JACI PARANA	Anopheles darlingi	-9.259651	-64.395767	346682.2	8976140.8	Pre_flood	1
Apr	2012	JACI PARANA	Anopheles darlingi	-9.259651	-64.395767	346682.2	8976140.8	Pre_flood	1
Apr	2012	JACI PARANA	Anopheles darlingi	-9.259651	-64.395767	346682.2	8976140.8	Pre_flood	1
Apr	2012	JACI PARANA	Anopheles darlingi	-9.259651	-64.395767	346682.2	8976140.8	Pre_flood	1
Apr	2012	JACI PARANA	Anopheles darlingi	-9.259651	-64.395767	346682.2	8976140.8	Pre_flood	1
Apr	2012	JACI PARANA	Anopheles darlingi	-9.259651	-64.395767	346682.2	8976140.8	Pre_flood	1
Apr	2012	JACI PARANA	Anopheles darlingi	-9.259651	-64.395767	346682.2	8976140.8	Pre_flood	1
Apr	2012	JACI PARANA	Anopheles darlingi	-9.259651	-64.395767	346682.2	8976140.8	Pre_flood	1
Apr	2012	JACI PARANA	Anopheles darlingi	-9.259651	-64.395767	346682.2	8976140.8	Pre_flood	1
Apr	2012	JACI PARANA	Anopheles darlingi	-9.259651	-64.395767	346682.2	8976140.8	Pre_flood	1
Apr	2012	JACI PARANA	Anopheles nuneztovari	-9.259651	-64.395767	346682.2	8976140.8	Pre_flood	1
Apr	2012	JACI PARANA	Anopheles nuneztovari	-9.259651	-64.395767	346682.2	8976140.8	Pre_flood	1
Apr	2012	JACI PARANA	Anopheles darlingi	-9.259651	-64.395767	346682.2	8976140.8	Pre_flood	1
Apr	2012	JACI PARANA	Anopheles darlingi	-9.259651	-64.395767	346682.2	8976140.8	Pre_flood	1
Apr	2012	JACI PARANA	Anopheles darlingi	-9.259651	-64.395767	346682.2	8976140.8	Pre_flood	1
Apr	2012	JACI PARANA	Anopheles darlingi	-9.259651	-64.395767	346682.2	8976140.8	Pre_flood	1
Apr	2012	JACI PARANA	Anopheles darlingi	-9.259651	-64.395767	346682.2	8976140.8	Pre_flood	1
Apr	2012	JACI PARANA	Anopheles darlingi	-9.259651	-64.395767	346682.2	8976140.8	Pre_flood	1
Apr	2012	JACI PARANA	Anopheles darlingi	-9.259651	-64.395767	346682.2	8976140.8	Pre_flood	1
Apr	2012	JACI PARANA	Anopheles nuneztovari	-9.259651	-64.395767	346682.2	8976140.8	Pre_flood	1
Apr	2012	JACI PARANA	Anopheles nuneztovari	-9.259651	-64.395767	346682.2	8976140.8	Pre_flood	1
Apr	2012	JACI PARANA	Anopheles darlingi	-9.259651	-64.395767	346682.2	8976140.8	Pre_flood	1
Apr	2012	JACI PARANA	Anopheles darlingi	-9.259651	-64.395767	346682.2	8976140.8	Pre_flood	1
Apr	2013	VILA JIRAU	Anopheles konderi	-9.426522	-64.695708	313815.5	8957540.8	Second_quote	1
Apr	2013	VILA JIRAU	Anopheles darlingi	-9.426522	-64.695708	313815.5	8957540.8	Second_quote	1
Apr	2013	VILA JIRAU	Anopheles darlingi	-9.426522	-64.695708	313815.5	8957540.8	Second_quote	1
Apr	2013	VILA JIRAU	Anopheles darlingi	-9.426522	-64.695708	313815.5	8957540.8	Second_quote	1
Apr	2013	VILA JIRAU	Anopheles darlingi	-9.426522	-64.695708	313815.5	8957540.8	Second_quote	1
Apr	2013	MUTUM PARANA	Anopheles darlingi	-9.621065	-64.94316	232692.9	8930479.9	Second_quote	1
Apr	2013	MUTUM PARANA	Anopheles darlingi	-9.621065	-64.94316	232692.9	8930479.9	Second_quote	1
Apr	2013	VILA JIRAU	Anopheles darlingi	-9.426522	-64.695708	313815.5	8957540.8	Second_quote	1
Apr	2013	MUTUM PARANA	Anopheles deaneorum	-9.621065	-64.94316	232692.9	8930479.9	Second_quote	1
Apr	2013	POLIGONAL MARGEM DIREITA	Anopheles darlingi	-9.245362	-64.613768	240152.97	8926774.51	Second_quote	1
Apr	2013	POLIGONAL MARGEM DIREITA	Anopheles darlingi	-9.245362	-64.613768	240152.97	8926774.51	Second_quote	1
Apr	2013	POLIGONAL MARGEM DIREITA	Anopheles darlingi	-9.245362	-64.613768	240152.97	8926774.51	Second_quote	1
Apr	2013	POLIGONAL MARGEM DIREITA	Anopheles darlingi	-9.245362	-64.613768	240152.97	8926774.51	Second_quote	1
Apr	2013	POLIGONAL MARGEM DIREITA	Anopheles darlingi	-9.245362	-64.613768	240152.97	8926774.51	Second_quote	1
Apr	2013	POLIGONAL MARGEM DIREITA	Anopheles darlingi	-9.245362	-64.613768	240152.97	8926774.51	Second_quote	1
Apr	2013	POLIGONAL MARGEM DIREITA	Anopheles darlingi	-9.245362	-64.613768	240152.97	8926774.51	Second_quote	1
Apr	2013	POLIGONAL MARGEM DIREITA	Anopheles darlingi	-9.245362	-64.613768	240152.97	8926774.51	Second_quote	1
Apr	2013	POLIGONAL MARGEM DIREITA	Anopheles darlingi	-9.245362	-64.613768	240152.97	8926774.51	Second_quote	1
Apr	2013	POLIGONAL MARGEM DIREITA	Anopheles darlingi	-9.245362	-64.613768	240152.97	8926774.51	Second_quote	1
Apr	2013	POLIGONAL MARGEM DIREITA	Anopheles darlingi	-9.245362	-64.613768	240152.97	8926774.51	Second_quote	1
Apr	2013	POLIGONAL MARGEM DIREITA	Anopheles darlingi	-9.245362	-64.613768	240152.97	8926774.51	Second_quote	1
Apr	2013	POLIGONAL MARGEM DIREITA	Anopheles nuneztovari	-9.245362	-64.613768	240152.97	8926774.51	Second_quote	1
Apr	2013	POLIGONAL MARGEM DIREITA	Anopheles nuneztovari	-9.245362	-64.613768	240152.97	8926774.51	Second_quote	1
Apr	2013	POLIGONAL MARGEM DIREITA	Anopheles triannulatus	-9.245362	-64.613768	240152.97	8926774.51	Second_quote	1
Apr	2013	POLIGONAL MARGEM DIREITA	Anopheles triannulatus	-9.245362	-64.613768	240152.97	8926774.51	Second_quote	1
Apr	2013	POLIGONAL MARGEM DIREITA	Anopheles triannulatus	-9.245362	-64.613768	240152.97	8926774.51	Second_quote	1
Apr	2013	POLIGONAL MARGEM DIREITA	Anopheles triannulatus	-9.245362	-64.613768	240152.97	8926774.51	Second_quote	1
Apr	2013	POLIGONAL MARGEM DIREITA	Anopheles triannulatus	-9.245362	-64.613768	240152.97	8926774.51	Second_quote	1
Apr	2013	POLIGONAL MARGEM DIREITA	Anopheles triannulatus	-9.245362	-64.613768	240152.97	8926774.51	Second_quote	1
Apr	2013	POLIGONAL MARGEM DIREITA	Anopheles triannulatus	-9.245362	-64.613768	240152.97	8926774.51	Second_quote	1
Apr	2013	POLIGONAL MARGEM DIREITA	Anopheles triannulatus	-9.245362	-64.613768	240152.97	8926774.51	Second_quote	1
Apr	2013	POLIGONAL MARGEM DIREITA	Anopheles triannulatus	-9.245362	-64.613768	240152.97	8926774.51	Second_quote	1
Apr	2013	BALSA ABUNA	Anopheles konderi	-9.666732	-65.435894	232692.9	8930479.9	Second_quote	1
Apr	2013	BALSA ABUNA	Anopheles darlingi	-9.666732	-65.435894	232692.9	8930479.9	Second_quote	1
Apr	2013	BALSA ABUNA	Anopheles darlingi	-9.666732	-65.435894	232692.9	8930479.9	Second_quote	1
Apr	2013	BALSA ABUNA	Anopheles darlingi	-9.666732	-65.435894	232692.9	8930479.9	Second_quote	1
Apr	2013	POLIGONAL MARGEM DIREITA	Anopheles konderi	-9.245362	-64.613768	240152.97	8926774.51	Second_quote	1
Apr	2013	VILA ABUNA	Anopheles darlingi	-9.676714	-65.401688	240152.97	8926774.51	Second_quote	1
Apr	2013	VILA ABUNA	Anopheles darlingi	-9.676714	-65.401688	240152.97	8926774.51	Second_quote	1
Apr	2013	VILA ABUNA	Anopheles darlingi	-9.676714	-65.401688	240152.97	8926774.51	Second_quote	1
Apr	2013	VILA ABUNA	Anopheles darlingi	-9.676714	-65.401688	240152.97	8926774.51	Second_quote	1
Apr	2013	VILA ABUNA	Anopheles darlingi	-9.676714	-65.401688	240152.97	8926774.51	Second_quote	1
Apr	2013	POLIGONAL MARGEM ESQUERDA	Anopheles darlingi	-9.229662	-64.65125	232692.9	8930479.9	Second_quote	1
Apr	2013	POLIGONAL MARGEM ESQUERDA	Anopheles darlingi	-9.229662	-64.65125	232692.9	8930479.9	Second_quote	1
Apr	2013	POLIGONAL MARGEM ESQUERDA	Anopheles darlingi	-9.229662	-64.65125	232692.9	8930479.9	Second_quote	1
Apr	2013	POLIGONAL MARGEM ESQUERDA	Anopheles triannulatus	-9.229662	-64.65125	232692.9	8930479.9	Second_quote	1
Apr	2013	POLIGONAL MARGEM ESQUERDA	Anopheles darlingi	-9.229662	-64.65125	232692.9	8930479.9	Second_quote	1
Apr	2013	POLIGONAL MARGEM ESQUERDA	Anopheles darlingi	-9.229662	-64.65125	232692.9	8930479.9	Second_quote	1
Apr	2013	POLIGONAL MARGEM ESQUERDA	Anopheles darlingi	-9.229662	-64.65125	232692.9	8930479.9	Second_quote	1
Apr	2013	POLIGONAL MARGEM ESQUERDA	Anopheles darlingi	-9.229662	-64.65125	232692.9	8930479.9	Second_quote	1
Apr	2013	POLIGONAL MARGEM ESQUERDA	Anopheles darlingi	-9.229662	-64.65125	232692.9	8930479.9	Second_quote	1
Apr	2013	POLIGONAL MARGEM ESQUERDA	Anopheles darlingi	-9.229662	-64.65125	232692.9	8930479.9	Second_quote	1
Apr	2013	POLIGONAL MARGEM ESQUERDA	Anopheles darlingi	-9.229662	-64.65125	232692.9	8930479.9	Second_quote	1
Apr	2013	POLIGONAL MARGEM ESQUERDA	Anopheles darlingi	-9.229662	-64.65125	232692.9	8930479.9	Second_quote	1
Apr	2013	POLIGONAL MARGEM ESQUERDA	Anopheles darlingi	-9.229662	-64.65125	232692.9	8930479.9	Second_quote	1
Apr	2013	POLIGONAL MARGEM ESQUERDA	Anopheles darlingi	-9.229662	-64.65125	232692.9	8930479.9	Second_quote	1
Apr	2013	POLIGONAL MARGEM ESQUERDA	Anopheles darlingi	-9.229662	-64.65125	232692.9	8930479.9	Second_quote	1
Apr	2013	POLIGONAL MARGEM ESQUERDA	Anopheles darlingi	-9.229662	-64.65125	232692.9	8930479.9	Second_quote	1
Apr	2013	POLIGONAL MARGEM ESQUERDA	Anopheles darlingi	-9.229662	-64.65125	232692.9	8930479.9	Second_quote	1
Apr	2013	POLIGONAL MARGEM ESQUERDA	Anopheles darlingi	-9.229662	-64.65125	232692.9	8930479.9	Second_quote	1
Apr	2013	POLIGONAL MARGEM ESQUERDA	Anopheles darlingi	-9.229662	-64.65125	232692.9	8930479.9	Second_quote	1
Apr	2013	POLIGONAL MARGEM ESQUERDA	Anopheles darlingi	-9.229662	-64.65125	232692.9	8930479.9	Second_quote	1
Apr	2013	POLIGONAL MARGEM ESQUERDA	Anopheles darlingi	-9.229662	-64.65125	232692.9	8930479.9	Second_quote	1
Apr	2013	POLIGONAL MARGEM ESQUERDA	Anopheles darlingi	-9.229662	-64.65125	232692.9	8930479.9	Second_quote	1
Apr	2013	POLIGONAL MARGEM ESQUERDA	Anopheles darlingi	-9.229662	-64.65125	232692.9	8930479.9	Second_quote	1
Apr	2013	POLIGONAL MARGEM ESQUERDA	Anopheles triannulatus	-9.229662	-64.65125	232692.9	8930479.9	Second_quote	1
Apr	2013	POLIGONAL MARGEM ESQUERDA	Anopheles darlingi	-9.229662	-64.65125	232692.9	8930479.9	Second_quote	1
Apr	2013	POLIGONAL MARGEM ESQUERDA	Anopheles darlingi	-9.229662	-64.65125	232692.9	8930479.9	Second_quote	1
Apr	2013	POLIGONAL MARGEM ESQUERDA	Anopheles darlingi	-9.229662	-64.65125	232692.9	8930479.9	Second_quote	1
Apr	2013	POLIGONAL MARGEM ESQUERDA	Anopheles darlingi	-9.229662	-64.65125	232692.9	8930479.9	Second_quote	1
Apr	2013	POLIGONAL MARGEM ESQUERDA	Anopheles darlingi	-9.229662	-64.65125	232692.9	8930479.9	Second_quote	1
Apr	2013	POLIGONAL MARGEM ESQUERDA	Anopheles darlingi	-9.229662	-64.65125	232692.9	8930479.9	Second_quote	1
Apr	2013	POLIGONAL MARGEM ESQUERDA	Anopheles darlingi	-9.229662	-64.65125	232692.9	8930479.9	Second_quote	1
Apr	2013	POLIGONAL MARGEM ESQUERDA	Anopheles darlingi	-9.229662	-64.65125	232692.9	8930479.9	Second_quote	1
Apr	2013	POLIGONAL MARGEM ESQUERDA	Anopheles darlingi	-9.229662	-64.65125	232692.9	8930479.9	Second_quote	1
Apr	2013	POLIGONAL MARGEM ESQUERDA	Anopheles darlingi	-9.229662	-64.65125	232692.9	8930479.9	Second_quote	1
Apr	2013	POLIGONAL MARGEM ESQUERDA	Anopheles darlingi	-9.229662	-64.65125	232692.9	8930479.9	Second_quote	1
Apr	2013	POLIGONAL MARGEM ESQUERDA	Anopheles darlingi	-9.229662	-64.65125	232692.9	8930479.9	Second_quote	1
Apr	2013	POLIGONAL MARGEM ESQUERDA	Anopheles darlingi	-9.229662	-64.65125	232692.9	8930479.9	Second_quote	1
Apr	2013	POLIGONAL MARGEM ESQUERDA	Anopheles darlingi	-9.229662	-64.65125	232692.9	8930479.9	Second_quote	1
Apr	2013	POLIGONAL MARGEM ESQUERDA	Anopheles darlingi	-9.229662	-64.65125	232692.9	8930479.9	Second_quote	1
Apr	2013	POLIGONAL MARGEM ESQUERDA	Anopheles darlingi	-9.229662	-64.65125	232692.9	8930479.9	Second_quote	1
Apr	2013	BALSA ABUNA	Anopheles darlingi	-9.666732	-65.435894	232692.9	8930479.9	Second_quote	1
Apr	2013	BALSA ABUNA	Anopheles darlingi	-9.666732	-65.435894	232692.9	8930479.9	Second_quote	1
Apr	2013	BALSA ABUNA	Anopheles darlingi	-9.666732	-65.435894	232692.9	8930479.9	Second_quote	1
Apr	2013	BALSA ABUNA	Anopheles darlingi	-9.666732	-65.435894	232692.9	8930479.9	Second_quote	1
Apr	2013	BALSA ABUNA	Anopheles darlingi	-9.666732	-65.435894	232692.9	8930479.9	Second_quote	1
Apr	2013	BALSA ABUNA	Anopheles darlingi	-9.666732	-65.435894	232692.9	8930479.9	Second_quote	1
Apr	2013	BALSA ABUNA	Anopheles darlingi	-9.666732	-65.435894	232692.9	8930479.9	Second_quote	1
Apr	2013	POLIGONAL MARGEM ESQUERDA	Anopheles darlingi	-9.229662	-64.65125	232692.9	8930479.9	Second_quote	1
Apr	2013	POLIGONAL MARGEM ESQUERDA	Anopheles darlingi	-9.229662	-64.65125	232692.9	8930479.9	Second_quote	1
Apr	2013	POLIGONAL MARGEM ESQUERDA	Anopheles darlingi	-9.229662	-64.65125	232692.9	8930479.9	Second_quote	1
Apr	2013	POLIGONAL MARGEM ESQUERDA	Anopheles darlingi	-9.229662	-64.65125	232692.9	8930479.9	Second_quote	1
Apr	2013	POLIGONAL MARGEM ESQUERDA	Anopheles darlingi	-9.229662	-64.65125	232692.9	8930479.9	Second_quote	1
Apr	2013	POLIGONAL MARGEM ESQUERDA	Anopheles darlingi	-9.229662	-64.65125	232692.9	8930479.9	Second_quote	1
Apr	2013	POLIGONAL MARGEM ESQUERDA	Anopheles darlingi	-9.229662	-64.65125	232692.9	8930479.9	Second_quote	1
Apr	2013	POLIGONAL MARGEM ESQUERDA	Anopheles darlingi	-9.229662	-64.65125	232692.9	8930479.9	Second_quote	1
Apr	2013	POLIGONAL MARGEM ESQUERDA	Anopheles nuneztovari	-9.229662	-64.65125	232692.9	8930479.9	Second_quote	1
Apr	2013	POLIGONAL MARGEM ESQUERDA	Anopheles darlingi	-9.229662	-64.65125	232692.9	8930479.9	Second_quote	1
Apr	2013	POLIGONAL MARGEM ESQUERDA	Anopheles darlingi	-9.229662	-64.65125	232692.9	8930479.9	Second_quote	1
Apr	2013	POLIGONAL MARGEM ESQUERDA	Anopheles darlingi	-9.229662	-64.65125	232692.9	8930479.9	Second_quote	1
Apr	2013	POLIGONAL MARGEM ESQUERDA	Anopheles darlingi	-9.229662	-64.65125	232692.9	8930479.9	Second_quote	1
Apr	2013	POLIGONAL MARGEM ESQUERDA	Anopheles darlingi	-9.229662	-64.65125	232692.9	8930479.9	Second_quote	1
Apr	2013	POLIGONAL MARGEM ESQUERDA	Anopheles darlingi	-9.229662	-64.65125	232692.9	8930479.9	Second_quote	1
Apr	2013	POLIGONAL MARGEM ESQUERDA	Anopheles darlingi	-9.229662	-64.65125	232692.9	8930479.9	Second_quote	1
Apr	2013	POLIGONAL MARGEM ESQUERDA	Anopheles darlingi	-9.229662	-64.65125	232692.9	8930479.9	Second_quote	1
Apr	2013	POLIGONAL MARGEM ESQUERDA	Anopheles darlingi	-9.229662	-64.65125	232692.9	8930479.9	Second_quote	1
Apr	2013	MUTUM PARANA	Anopheles braziliensis	-9.621065	-64.94316	232692.9	8930479.9	Second_quote	1
Apr	2013	MUTUM PARANA	Anopheles braziliensis	-9.621065	-64.94316	232692.9	8930479.9	Second_quote	1
Apr	2013	MUTUM PARANA	Anopheles darlingi	-9.621065	-64.94316	232692.9	8930479.9	Second_quote	1
Apr	2013	MUTUM PARANA	Anopheles darlingi	-9.621065	-64.94316	232692.9	8930479.9	Second_quote	1
Apr	2013	MUTUM PARANA	Anopheles deaneorum	-9.621065	-64.94316	232692.9	8930479.9	Second_quote	1
Apr	2013	MUTUM PARANA	Anopheles deaneorum	-9.621065	-64.94316	232692.9	8930479.9	Second_quote	1
Apr	2013	MUTUM PARANA	Anopheles darlingi	-9.621065	-64.94316	232692.9	8930479.9	Second_quote	1
Apr	2013	MUTUM PARANA	Anopheles darlingi	-9.621065	-64.94316	232692.9	8930479.9	Second_quote	1
Apr	2013	JACI PARANA	Anopheles darlingi	-9.259651	-64.395767	232692.9	8930479.9	Second_quote	1
Apr	2013	JACI PARANA	Anopheles darlingi	-9.259651	-64.395767	232692.9	8930479.9	Second_quote	1
Apr	2013	JACI PARANA	Anopheles mattogrossensis	-9.259651	-64.395767	232692.9	8930479.9	Second_quote	1
Apr	2013	JACI PARANA	Anopheles darlingi	-9.259651	-64.395767	232692.9	8930479.9	Second_quote	1
Apr	2013	JACI PARANA	Anopheles mattogrossensis	-9.259651	-64.395767	232692.9	8930479.9	Second_quote	1
Apr	2013	JACI PARANA	Anopheles darlingi	-9.259651	-64.395767	232692.9	8930479.9	Second_quote	1
Apr	2013	JACI PARANA	Anopheles darlingi	-9.259651	-64.395767	232692.9	8930479.9	Second_quote	1
Apr	2013	JACI PARANA	Anopheles mattogrossensis	-9.259651	-64.395767	232692.9	8930479.9	Second_quote	1
Apr	2013	JACI PARANA	Anopheles darlingi	-9.259651	-64.395767	232692.9	8930479.9	Second_quote	1
Apr	2013	JACI PARANA	Anopheles darlingi	-9.259651	-64.395767	232692.9	8930479.9	Second_quote	1
Apr	2013	JACI PARANA	Anopheles darlingi	-9.259651	-64.395767	232692.9	8930479.9	Second_quote	1
Apr	2013	JACI PARANA	Anopheles mattogrossensis	-9.259651	-64.395767	232692.9	8930479.9	Second_quote	1
Apr	2013	POLIGONAL MARGEM ESQUERDA	Anopheles darlingi	-9.229662	-64.65125	232692.9	8930479.9	Second_quote	1
Apr	2013	POLIGONAL MARGEM ESQUERDA	Anopheles darlingi	-9.229662	-64.65125	232692.9	8930479.9	Second_quote	1
Apr	2013	POLIGONAL MARGEM ESQUERDA	Anopheles darlingi	-9.229662	-64.65125	232692.9	8930479.9	Second_quote	1
Apr	2013	POLIGONAL MARGEM ESQUERDA	Anopheles darlingi	-9.229662	-64.65125	232692.9	8930479.9	Second_quote	1
Apr	2013	POLIGONAL MARGEM ESQUERDA	Anopheles darlingi	-9.229662	-64.65125	232692.9	8930479.9	Second_quote	1
Apr	2013	POLIGONAL MARGEM ESQUERDA	Anopheles darlingi	-9.229662	-64.65125	232692.9	8930479.9	Second_quote	1
Apr	2013	POLIGONAL MARGEM ESQUERDA	Anopheles darlingi	-9.229662	-64.65125	232692.9	8930479.9	Second_quote	1
Apr	2013	BALSA ABUNA	Anopheles darlingi	-9.666732	-65.435894	232692.9	8930479.9	Second_quote	1
Apr	2013	BALSA ABUNA	Anopheles darlingi	-9.666732	-65.435894	232692.9	8930479.9	Second_quote	1
Apr	2013	BALSA ABUNA	Anopheles darlingi	-9.666732	-65.435894	232692.9	8930479.9	Second_quote	1
Apr	2013	BALSA ABUNA	Anopheles darlingi	-9.666732	-65.435894	232692.9	8930479.9	Second_quote	1
Apr	2013	BALSA ABUNA	Anopheles darlingi	-9.666732	-65.435894	232692.9	8930479.9	Second_quote	1
Apr	2013	BALSA ABUNA	Anopheles darlingi	-9.666732	-65.435894	232692.9	8930479.9	Second_quote	1
Apr	2013	BALSA ABUNA	Anopheles darlingi	-9.666732	-65.435894	232692.9	8930479.9	Second_quote	1
Apr	2013	BALSA ABUNA	Anopheles darlingi	-9.666732	-65.435894	232692.9	8930479.9	Second_quote	1
Apr	2013	BALSA ABUNA	Anopheles darlingi	-9.666732	-65.435894	232692.9	8930479.9	Second_quote	1
Apr	2013	BALSA ABUNA	Anopheles darlingi	-9.666732	-65.435894	232692.9	8930479.9	Second_quote	1
Apr	2013	BALSA ABUNA	Anopheles darlingi	-9.666732	-65.435894	232692.9	8930479.9	Second_quote	1
Apr	2013	BALSA ABUNA	Anopheles darlingi	-9.666732	-65.435894	232692.9	8930479.9	Second_quote	1
Apr	2013	BALSA ABUNA	Anopheles darlingi	-9.666732	-65.435894	232692.9	8930479.9	Second_quote	1
Apr	2013	BALSA ABUNA	Anopheles darlingi	-9.666732	-65.435894	232692.9	8930479.9	Second_quote	1
Apr	2013	BALSA ABUNA	Anopheles darlingi	-9.666732	-65.435894	232692.9	8930479.9	Second_quote	1
Apr	2013	BALSA ABUNA	Anopheles darlingi	-9.666732	-65.435894	232692.9	8930479.9	Second_quote	1
Apr	2013	BALSA ABUNA	Anopheles darlingi	-9.666732	-65.435894	232692.9	8930479.9	Second_quote	1
Apr	2013	BALSA ABUNA	Anopheles darlingi	-9.666732	-65.435894	232692.9	8930479.9	Second_quote	1
Apr	2013	BALSA ABUNA	Anopheles darlingi	-9.666732	-65.435894	232692.9	8930479.9	Second_quote	1
Apr	2013	BALSA ABUNA	Anopheles darlingi	-9.666732	-65.435894	232692.9	8930479.9	Second_quote	1
Apr	2013	BALSA ABUNA	Anopheles darlingi	-9.666732	-65.435894	232692.9	8930479.9	Second_quote	1
Apr	2013	BALSA ABUNA	Anopheles darlingi	-9.666732	-65.435894	232692.9	8930479.9	Second_quote	1
Apr	2013	BALSA ABUNA	Anopheles darlingi	-9.666732	-65.435894	232692.9	8930479.9	Second_quote	1
Apr	2013	BALSA ABUNA	Anopheles darlingi	-9.666732	-65.435894	232692.9	8930479.9	Second_quote	1
Apr	2013	BALSA ABUNA	Anopheles darlingi	-9.666732	-65.435894	232692.9	8930479.9	Second_quote	1
Apr	2013	POLIGONAL MARGEM ESQUERDA	Anopheles darlingi	-9.229662	-64.65125	232692.9	8930479.9	Second_quote	1
Apr	2014	VILA JIRAU	Anopheles darlingi	-9.426522	-64.695708	329580	8972372.4	Third_quote	1
Apr	2014	VILA JIRAU	Anopheles darlingi	-9.426522	-64.695708	329580	8972372.4	Third_quote	1
Apr	2014	VILA JIRAU	Anopheles darlingi	-9.426522	-64.695708	329580	8972372.4	Third_quote	1
Apr	2014	VILA JIRAU	Anopheles darlingi	-9.426522	-64.695708	329580	8972372.4	Third_quote	1
Apr	2014	VILA JIRAU	Anopheles darlingi	-9.426522	-64.695708	329580	8972372.4	Third_quote	1
Apr	2014	VILA JIRAU	Anopheles darlingi	-9.426522	-64.695708	329580	8972372.4	Third_quote	1
Apr	2014	VILA JIRAU	Anopheles darlingi	-9.426522	-64.695708	329580	8972372.4	Third_quote	1
Apr	2014	VILA JIRAU	Anopheles darlingi	-9.426522	-64.695708	329580	8972372.4	Third_quote	1
Apr	2014	VILA JIRAU	Anopheles darlingi	-9.426522	-64.695708	329580	8972372.4	Third_quote	1
Apr	2014	VILA JIRAU	Anopheles darlingi	-9.426522	-64.695708	329580	8972372.4	Third_quote	1
Apr	2014	VILA JIRAU	Anopheles darlingi	-9.426522	-64.695708	329580	8972372.4	Third_quote	1
Apr	2014	VILA JIRAU	Anopheles darlingi	-9.426522	-64.695708	329580	8972372.4	Third_quote	1
Apr	2014	VILA JIRAU	Anopheles darlingi	-9.426522	-64.695708	329580	8972372.4	Third_quote	1
Apr	2014	VILA JIRAU	Anopheles darlingi	-9.426522	-64.695708	329580	8972372.4	Third_quote	1
Apr	2014	VILA JIRAU	Anopheles darlingi	-9.426522	-64.695708	329580	8972372.4	Third_quote	1
Apr	2014	VILA JIRAU	Anopheles darlingi	-9.426522	-64.695708	329580	8972372.4	Third_quote	1
Apr	2014	VILA JIRAU	Anopheles darlingi	-9.426522	-64.695708	329580	8972372.4	Third_quote	1
Apr	2014	VILA JIRAU	Anopheles darlingi	-9.426522	-64.695708	329580	8972372.4	Third_quote	1
Apr	2014	VILA JIRAU	Anopheles darlingi	-9.426522	-64.695708	329580	8972372.4	Third_quote	1
Apr	2014	VILA JIRAU	Anopheles darlingi	-9.426522	-64.695708	329580	8972372.4	Third_quote	1
Apr	2014	VILA JIRAU	Anopheles darlingi	-9.426522	-64.695708	329580	8972372.4	Third_quote	1
Apr	2014	VILA JIRAU	Anopheles darlingi	-9.426522	-64.695708	329580	8972372.4	Third_quote	1
Apr	2014	VILA JIRAU	Anopheles darlingi	-9.426522	-64.695708	329580	8972372.4	Third_quote	1
Apr	2014	VILA JIRAU	Anopheles darlingi	-9.426522	-64.695708	329580	8972372.4	Third_quote	1
Apr	2014	VILA JIRAU	Anopheles darlingi	-9.426522	-64.695708	329580	8972372.4	Third_quote	1
Apr	2014	VILA JIRAU	Anopheles darlingi	-9.426522	-64.695708	329580	8972372.4	Third_quote	1
Apr	2014	VILA JIRAU	Anopheles darlingi	-9.426522	-64.695708	329580	8972372.4	Third_quote	1
Apr	2014	VILA JIRAU	Anopheles darlingi	-9.426522	-64.695708	329580	8972372.4	Third_quote	1
Apr	2014	VILA JIRAU	Anopheles darlingi	-9.426522	-64.695708	329580	8972372.4	Third_quote	1
Apr	2014	VILA JIRAU	Anopheles darlingi	-9.426522	-64.695708	329580	8972372.4	Third_quote	1
Apr	2014	VILA JIRAU	Anopheles darlingi	-9.426522	-64.695708	329580	8972372.4	Third_quote	1
Apr	2014	VILA JIRAU	Anopheles darlingi	-9.426522	-64.695708	329580	8972372.4	Third_quote	1
Apr	2014	VILA JIRAU	Anopheles darlingi	-9.426522	-64.695708	329580	8972372.4	Third_quote	1
Apr	2014	VILA JIRAU	Anopheles darlingi	-9.426522	-64.695708	329580	8972372.4	Third_quote	1
Apr	2014	VILA JIRAU	Anopheles darlingi	-9.426522	-64.695708	329580	8972372.4	Third_quote	1
Apr	2014	VILA JIRAU	Anopheles darlingi	-9.426522	-64.695708	329580	8972372.4	Third_quote	1
Apr	2014	VILA JIRAU	Anopheles darlingi	-9.426522	-64.695708	329580	8972372.4	Third_quote	1
Apr	2014	VILA JIRAU	Anopheles darlingi	-9.426522	-64.695708	329580	8972372.4	Third_quote	1
Apr	2014	VILA JIRAU	Anopheles darlingi	-9.426522	-64.695708	329580	8972372.4	Third_quote	1
Apr	2014	VILA JIRAU	Anopheles darlingi	-9.426522	-64.695708	329580	8972372.4	Third_quote	1
Apr	2014	VILA JIRAU	Anopheles darlingi	-9.426522	-64.695708	329580	8972372.4	Third_quote	1
Apr	2014	VILA JIRAU	Anopheles darlingi	-9.426522	-64.695708	329580	8972372.4	Third_quote	1
Apr	2014	VILA JIRAU	Anopheles darlingi	-9.426522	-64.695708	329580	8972372.4	Third_quote	1
Apr	2014	VILA JIRAU	Anopheles darlingi	-9.426522	-64.695708	329580	8972372.4	Third_quote	1
Apr	2014	VILA JIRAU	Anopheles darlingi	-9.426522	-64.695708	329580	8972372.4	Third_quote	1
Apr	2014	VILA JIRAU	Anopheles darlingi	-9.426522	-64.695708	329580	8972372.4	Third_quote	1
Apr	2014	VILA JIRAU	Anopheles darlingi	-9.426522	-64.695708	329580	8972372.4	Third_quote	1
Apr	2014	VILA JIRAU	Anopheles darlingi	-9.426522	-64.695708	329580	8972372.4	Third_quote	1
Apr	2014	VILA JIRAU	Anopheles darlingi	-9.426522	-64.695708	329580	8972372.4	Third_quote	1
Apr	2014	VILA JIRAU	Anopheles darlingi	-9.426522	-64.695708	329580	8972372.4	Third_quote	1
Apr	2014	VILA JIRAU	Anopheles darlingi	-9.426522	-64.695708	329580	8972372.4	Third_quote	1
Apr	2014	VILA JIRAU	Anopheles darlingi	-9.426522	-64.695708	329580	8972372.4	Third_quote	1
Apr	2014	VILA JIRAU	Anopheles darlingi	-9.426522	-64.695708	329580	8972372.4	Third_quote	1
Apr	2014	VILA JIRAU	Anopheles darlingi	-9.426522	-64.695708	329580	8972372.4	Third_quote	1
Apr	2014	VILA JIRAU	Anopheles darlingi	-9.426522	-64.695708	329580	8972372.4	Third_quote	1
Apr	2014	VILA JIRAU	Anopheles darlingi	-9.426522	-64.695708	329580	8972372.4	Third_quote	1
Apr	2014	VILA JIRAU	Anopheles darlingi	-9.426522	-64.695708	329580	8972372.4	Third_quote	1
Apr	2014	VILA JIRAU	Anopheles darlingi	-9.426522	-64.695708	329580	8972372.4	Third_quote	1
Apr	2014	VILA JIRAU	Anopheles darlingi	-9.426522	-64.695708	329580	8972372.4	Third_quote	1
Apr	2014	VILA JIRAU	Anopheles darlingi	-9.426522	-64.695708	329580	8972372.4	Third_quote	1
Apr	2014	VILA JIRAU	Anopheles darlingi	-9.426522	-64.695708	329580	8972372.4	Third_quote	1
Apr	2014	VILA JIRAU	Anopheles darlingi	-9.426522	-64.695708	329580	8972372.4	Third_quote	1
Apr	2014	VILA JIRAU	Anopheles darlingi	-9.426522	-64.695708	329580	8972372.4	Third_quote	1
Apr	2014	VILA JIRAU	Anopheles darlingi	-9.426522	-64.695708	329580	8972372.4	Third_quote	1
Apr	2014	VILA JIRAU	Anopheles darlingi	-9.426522	-64.695708	329580	8972372.4	Third_quote	1
Apr	2014	VILA JIRAU	Anopheles darlingi	-9.426522	-64.695708	329580	8972372.4	Third_quote	1
Apr	2014	VILA JIRAU	Anopheles darlingi	-9.426522	-64.695708	329580	8972372.4	Third_quote	1
Apr	2014	VILA JIRAU	Anopheles darlingi	-9.426522	-64.695708	329580	8972372.4	Third_quote	1
Apr	2014	VILA JIRAU	Anopheles darlingi	-9.426522	-64.695708	329580	8972372.4	Third_quote	1
Apr	2014	VILA JIRAU	Anopheles darlingi	-9.426522	-64.695708	329580	8972372.4	Third_quote	1
Apr	2014	VILA JIRAU	Anopheles darlingi	-9.426522	-64.695708	329580	8972372.4	Third_quote	1
Apr	2014	VILA JIRAU	Anopheles darlingi	-9.426522	-64.695708	329580	8972372.4	Third_quote	1
Apr	2014	VILA JIRAU	Anopheles darlingi	-9.426522	-64.695708	329580	8972372.4	Third_quote	1
Apr	2014	VILA JIRAU	Anopheles darlingi	-9.426522	-64.695708	329580	8972372.4	Third_quote	1
Apr	2014	VILA JIRAU	Anopheles darlingi	-9.426522	-64.695708	329580	8972372.4	Third_quote	1
Apr	2014	VILA JIRAU	Anopheles darlingi	-9.426522	-64.695708	329580	8972372.4	Third_quote	1
Apr	2014	VILA JIRAU	Anopheles darlingi	-9.426522	-64.695708	329580	8972372.4	Third_quote	1
Apr	2014	VILA JIRAU	Anopheles darlingi	-9.426522	-64.695708	329580	8972372.4	Third_quote	1
Apr	2014	VILA JIRAU	Anopheles darlingi	-9.426522	-64.695708	329580	8972372.4	Third_quote	1
Apr	2014	VILA JIRAU	Anopheles darlingi	-9.426522	-64.695708	329580	8972372.4	Third_quote	1
Apr	2014	VILA JIRAU	Anopheles darlingi	-9.426522	-64.695708	329580	8972372.4	Third_quote	1
Apr	2014	VILA JIRAU	Anopheles darlingi	-9.426522	-64.695708	329580	8972372.4	Third_quote	1
Apr	2014	VILA JIRAU	Anopheles darlingi	-9.426522	-64.695708	329580	8972372.4	Third_quote	1
Apr	2014	VILA JIRAU	Anopheles darlingi	-9.426522	-64.695708	329580	8972372.4	Third_quote	1
Apr	2014	VILA JIRAU	Anopheles darlingi	-9.426522	-64.695708	329580	8972372.4	Third_quote	1
Apr	2014	VILA JIRAU	Anopheles darlingi	-9.426522	-64.695708	329580	8972372.4	Third_quote	1
Apr	2014	VILA JIRAU	Anopheles darlingi	-9.426522	-64.695708	329580	8972372.4	Third_quote	1
Apr	2014	VILA JIRAU	Anopheles darlingi	-9.426522	-64.695708	329580	8972372.4	Third_quote	1
Apr	2014	VILA JIRAU	Anopheles darlingi	-9.426522	-64.695708	329580	8972372.4	Third_quote	1
Apr	2014	VILA JIRAU	Anopheles darlingi	-9.426522	-64.695708	329580	8972372.4	Third_quote	1
Apr	2014	VILA JIRAU	Anopheles darlingi	-9.426522	-64.695708	329580	8972372.4	Third_quote	1
Apr	2014	VILA JIRAU	Anopheles darlingi	-9.426522	-64.695708	329580	8972372.4	Third_quote	1
Apr	2014	VILA JIRAU	Anopheles darlingi	-9.426522	-64.695708	329580	8972372.4	Third_quote	1
Apr	2014	VILA JIRAU	Anopheles darlingi	-9.426522	-64.695708	329580	8972372.4	Third_quote	1
Apr	2014	VILA JIRAU	Anopheles darlingi	-9.426522	-64.695708	329580	8972372.4	Third_quote	1
Apr	2014	VILA JIRAU	Anopheles darlingi	-9.426522	-64.695708	329580	8972372.4	Third_quote	1
Apr	2014	VILA JIRAU	Anopheles darlingi	-9.426522	-64.695708	329580	8972372.4	Third_quote	1
Apr	2014	VILA JIRAU	Anopheles darlingi	-9.426522	-64.695708	329580	8972372.4	Third_quote	1
Apr	2014	VILA JIRAU	Anopheles darlingi	-9.426522	-64.695708	329580	8972372.4	Third_quote	1
Apr	2014	VILA JIRAU	Anopheles darlingi	-9.426522	-64.695708	329580	8972372.4	Third_quote	1
Apr	2014	VILA JIRAU	Anopheles darlingi	-9.426522	-64.695708	329580	8972372.4	Third_quote	1
Apr	2014	VILA JIRAU	Anopheles darlingi	-9.426522	-64.695708	329580	8972372.4	Third_quote	1
Apr	2014	VILA JIRAU	Anopheles darlingi	-9.426522	-64.695708	329580	8972372.4	Third_quote	1
Apr	2014	VILA JIRAU	Anopheles darlingi	-9.426522	-64.695708	329580	8972372.4	Third_quote	1
Apr	2014	VILA JIRAU	Anopheles darlingi	-9.426522	-64.695708	329580	8972372.4	Third_quote	1
Apr	2014	VILA JIRAU	Anopheles darlingi	-9.426522	-64.695708	329580	8972372.4	Third_quote	1
Apr	2014	VILA JIRAU	Anopheles darlingi	-9.426522	-64.695708	329580	8972372.4	Third_quote	1
Apr	2014	VILA JIRAU	Anopheles darlingi	-9.426522	-64.695708	329580	8972372.4	Third_quote	1
Apr	2014	VILA JIRAU	Anopheles darlingi	-9.426522	-64.695708	329580	8972372.4	Third_quote	1
Apr	2014	VILA JIRAU	Anopheles darlingi	-9.426522	-64.695708	329580	8972372.4	Third_quote	1
Apr	2014	VILA JIRAU	Anopheles darlingi	-9.426522	-64.695708	329580	8972372.4	Third_quote	1
Apr	2014	VILA JIRAU	Anopheles darlingi	-9.426522	-64.695708	329580	8972372.4	Third_quote	1
Apr	2014	VILA JIRAU	Anopheles darlingi	-9.426522	-64.695708	329580	8972372.4	Third_quote	1
Apr	2014	VILA JIRAU	Anopheles darlingi	-9.426522	-64.695708	329580	8972372.4	Third_quote	1
Apr	2014	VILA JIRAU	Anopheles sp.	-9.426522	-64.695708	329580	8972372.4	Third_quote	1
Apr	2014	VILA JIRAU	Anopheles sp.	-9.426522	-64.695708	329580	8972372.4	Third_quote	1
Apr	2014	VILA JIRAU	Anopheles sp.	-9.426522	-64.695708	329580	8972372.4	Third_quote	1
Apr	2014	VILA JIRAU	Anopheles sp.	-9.426522	-64.695708	329580	8972372.4	Third_quote	1
Apr	2014	VILA JIRAU	Anopheles sp.	-9.426522	-64.695708	329580	8972372.4	Third_quote	1
Apr	2014	VILA JIRAU	Anopheles sp.	-9.426522	-64.695708	329580	8972372.4	Third_quote	1
Apr	2014	VILA JIRAU	Anopheles sp.	-9.426522	-64.695708	329580	8972372.4	Third_quote	1
Apr	2014	VILA JIRAU	Anopheles sp.	-9.426522	-64.695708	329580	8972372.4	Third_quote	1
Apr	2014	VILA JIRAU	Anopheles sp.	-9.426522	-64.695708	329580	8972372.4	Third_quote	1
Apr	2014	VILA JIRAU	Anopheles sp.	-9.426522	-64.695708	329580	8972372.4	Third_quote	1
Apr	2014	VILA JIRAU	Anopheles sp.	-9.426522	-64.695708	329580	8972372.4	Third_quote	1
Apr	2014	VILA JIRAU	Anopheles sp.	-9.426522	-64.695708	329580	8972372.4	Third_quote	1
Apr	2014	VILA JIRAU	Anopheles sp.	-9.426522	-64.695708	329580	8972372.4	Third_quote	1
Apr	2014	VILA JIRAU	Anopheles sp.	-9.426522	-64.695708	329580	8972372.4	Third_quote	1
Apr	2014	VILA JIRAU	Anopheles sp.	-9.426522	-64.695708	329580	8972372.4	Third_quote	1
Apr	2014	VILA JIRAU	Anopheles sp.	-9.426522	-64.695708	329580	8972372.4	Third_quote	1
Apr	2014	VILA JIRAU	Anopheles sp.	-9.426522	-64.695708	329580	8972372.4	Third_quote	1
Apr	2014	VILA JIRAU	Anopheles sp.	-9.426522	-64.695708	329580	8972372.4	Third_quote	1
Apr	2014	VILA JIRAU	Anopheles sp.	-9.426522	-64.695708	329580	8972372.4	Third_quote	1
Apr	2014	VILA JIRAU	Anopheles sp.	-9.426522	-64.695708	329580	8972372.4	Third_quote	1
Apr	2014	VILA JIRAU	Anopheles sp.	-9.426522	-64.695708	329580	8972372.4	Third_quote	1
Apr	2014	VILA JIRAU	Anopheles sp.	-9.426522	-64.695708	329580	8972372.4	Third_quote	1
Apr	2014	VILA JIRAU	Anopheles sp.	-9.426522	-64.695708	329580	8972372.4	Third_quote	1
Apr	2014	VILA JIRAU	Anopheles sp.	-9.426522	-64.695708	329580	8972372.4	Third_quote	1
Apr	2014	VILA JIRAU	Anopheles sp.	-9.426522	-64.695708	329580	8972372.4	Third_quote	1
Apr	2014	VILA JIRAU	Anopheles sp.	-9.426522	-64.695708	329580	8972372.4	Third_quote	1
Apr	2014	VILA JIRAU	Anopheles sp.	-9.426522	-64.695708	329580	8972372.4	Third_quote	1
Apr	2014	VILA JIRAU	Anopheles sp.	-9.426522	-64.695708	329580	8972372.4	Third_quote	1
Apr	2014	VILA JIRAU	Anopheles sp.	-9.426522	-64.695708	329580	8972372.4	Third_quote	1
Apr	2014	VILA JIRAU	Anopheles sp.	-9.426522	-64.695708	329580	8972372.4	Third_quote	1
Apr	2014	VILA JIRAU	Anopheles sp.	-9.426522	-64.695708	329580	8972372.4	Third_quote	1
Apr	2014	VILA JIRAU	Anopheles sp.	-9.426522	-64.695708	329580	8972372.4	Third_quote	1
Apr	2014	VILA JIRAU	Anopheles sp.	-9.426522	-64.695708	329580	8972372.4	Third_quote	1
Apr	2014	VILA JIRAU	Anopheles sp.	-9.426522	-64.695708	329580	8972372.4	Third_quote	1
Apr	2014	VILA JIRAU	Anopheles sp.	-9.426522	-64.695708	329580	8972372.4	Third_quote	1
Apr	2014	VILA JIRAU	Anopheles sp.	-9.426522	-64.695708	329580	8972372.4	Third_quote	1
Apr	2014	VILA JIRAU	Anopheles sp.	-9.426522	-64.695708	329580	8972372.4	Third_quote	1
Apr	2014	VILA JIRAU	Anopheles sp.	-9.426522	-64.695708	329580	8972372.4	Third_quote	1
Apr	2014	VILA JIRAU	Anopheles sp.	-9.426522	-64.695708	329580	8972372.4	Third_quote	1
Apr	2014	VILA JIRAU	Anopheles sp.	-9.426522	-64.695708	329580	8972372.4	Third_quote	1
Apr	2014	VILA JIRAU	Anopheles sp.	-9.426522	-64.695708	329580	8972372.4	Third_quote	1
Apr	2014	VILA JIRAU	Anopheles sp.	-9.426522	-64.695708	329580	8972372.4	Third_quote	1
Apr	2014	VILA JIRAU	Anopheles sp.	-9.426522	-64.695708	329580	8972372.4	Third_quote	1
Apr	2014	VILA JIRAU	Anopheles sp.	-9.426522	-64.695708	329580	8972372.4	Third_quote	1
Apr	2014	VILA JIRAU	Anopheles sp.	-9.426522	-64.695708	329580	8972372.4	Third_quote	1
Apr	2014	VILA JIRAU	Anopheles sp.	-9.426522	-64.695708	329580	8972372.4	Third_quote	1
Apr	2014	VILA JIRAU	Anopheles sp.	-9.426522	-64.695708	329580	8972372.4	Third_quote	1
Apr	2014	VILA JIRAU	Anopheles sp.	-9.426522	-64.695708	329580	8972372.4	Third_quote	1
Apr	2014	VILA JIRAU	Anopheles sp.	-9.426522	-64.695708	329580	8972372.4	Third_quote	1
Apr	2014	VILA JIRAU	Anopheles sp.	-9.426522	-64.695708	329580	8972372.4	Third_quote	1
Apr	2014	VILA JIRAU	Anopheles sp.	-9.426522	-64.695708	329580	8972372.4	Third_quote	1
Apr	2014	VILA JIRAU	Anopheles sp.	-9.426522	-64.695708	329580	8972372.4	Third_quote	1
Apr	2014	VILA JIRAU	Anopheles sp.	-9.426522	-64.695708	329580	8972372.4	Third_quote	1
Apr	2014	VILA JIRAU	Anopheles sp.	-9.426522	-64.695708	329580	8972372.4	Third_quote	1
Apr	2014	VILA JIRAU	Anopheles sp.	-9.426522	-64.695708	329580	8972372.4	Third_quote	1
Apr	2014	VILA JIRAU	Anopheles sp.	-9.426522	-64.695708	329580	8972372.4	Third_quote	1
Apr	2014	VILA JIRAU	Anopheles sp.	-9.426522	-64.695708	329580	8972372.4	Third_quote	1
Apr	2014	VILA JIRAU	Anopheles sp.	-9.426522	-64.695708	329580	8972372.4	Third_quote	1
Apr	2014	VILA JIRAU	Anopheles sp.	-9.426522	-64.695708	329580	8972372.4	Third_quote	1
Apr	2014	VILA JIRAU	Anopheles sp.	-9.426522	-64.695708	329580	8972372.4	Third_quote	1
Apr	2014	VILA JIRAU	Anopheles sp.	-9.426522	-64.695708	329580	8972372.4	Third_quote	1
Apr	2014	VILA JIRAU	Anopheles sp.	-9.426522	-64.695708	329580	8972372.4	Third_quote	1
Apr	2014	VILA JIRAU	Anopheles sp.	-9.426522	-64.695708	329580	8972372.4	Third_quote	1
Apr	2014	VILA JIRAU	Anopheles sp.	-9.426522	-64.695708	329580	8972372.4	Third_quote	1
Apr	2014	VILA JIRAU	Anopheles sp.	-9.426522	-64.695708	329580	8972372.4	Third_quote	1
Apr	2014	VILA JIRAU	Anopheles sp.	-9.426522	-64.695708	329580	8972372.4	Third_quote	1
Apr	2014	VILA JIRAU	Anopheles sp.	-9.426522	-64.695708	329580	8972372.4	Third_quote	1
Apr	2014	VILA JIRAU	Anopheles sp.	-9.426522	-64.695708	329580	8972372.4	Third_quote	1
Apr	2014	VILA JIRAU	Anopheles sp.	-9.426522	-64.695708	329580	8972372.4	Third_quote	1
Apr	2014	VILA JIRAU	Anopheles sp.	-9.426522	-64.695708	329580	8972372.4	Third_quote	1
Apr	2014	VILA JIRAU	Anopheles sp.	-9.426522	-64.695708	329580	8972372.4	Third_quote	1
Apr	2014	VILA JIRAU	Anopheles sp.	-9.426522	-64.695708	329580	8972372.4	Third_quote	1
Apr	2014	VILA JIRAU	Anopheles sp.	-9.426522	-64.695708	329580	8972372.4	Third_quote	1
Apr	2014	VILA JIRAU	Anopheles sp.	-9.426522	-64.695708	329580	8972372.4	Third_quote	1
Apr	2014	VILA JIRAU	Anopheles sp.	-9.426522	-64.695708	329580	8972372.4	Third_quote	1
Apr	2014	VILA JIRAU	Anopheles sp.	-9.426522	-64.695708	329580	8972372.4	Third_quote	1
Apr	2014	VILA JIRAU	Anopheles sp.	-9.426522	-64.695708	329580	8972372.4	Third_quote	1
Apr	2014	VILA JIRAU	Anopheles sp.	-9.426522	-64.695708	329580	8972372.4	Third_quote	1
Apr	2014	VILA JIRAU	Anopheles sp.	-9.426522	-64.695708	329580	8972372.4	Third_quote	1
Apr	2014	VILA JIRAU	Anopheles sp.	-9.426522	-64.695708	329580	8972372.4	Third_quote	1
Apr	2014	VILA JIRAU	Anopheles sp.	-9.426522	-64.695708	329580	8972372.4	Third_quote	1
Apr	2014	VILA JIRAU	Anopheles sp.	-9.426522	-64.695708	329580	8972372.4	Third_quote	1
Apr	2014	VILA JIRAU	Anopheles sp.	-9.426522	-64.695708	329580	8972372.4	Third_quote	1
Apr	2014	VILA JIRAU	Anopheles sp.	-9.426522	-64.695708	329580	8972372.4	Third_quote	1
Apr	2014	VILA JIRAU	Anopheles sp.	-9.426522	-64.695708	329580	8972372.4	Third_quote	1
Apr	2014	VILA JIRAU	Anopheles sp.	-9.426522	-64.695708	329580	8972372.4	Third_quote	1
Apr	2014	VILA JIRAU	Anopheles sp.	-9.426522	-64.695708	329580	8972372.4	Third_quote	1
Apr	2014	VILA JIRAU	Anopheles sp.	-9.426522	-64.695708	329580	8972372.4	Third_quote	1
Apr	2014	VILA JIRAU	Anopheles sp.	-9.426522	-64.695708	329580	8972372.4	Third_quote	1
Apr	2014	VILA JIRAU	Anopheles sp.	-9.426522	-64.695708	329580	8972372.4	Third_quote	1
Apr	2014	VILA JIRAU	Anopheles sp.	-9.426522	-64.695708	329580	8972372.4	Third_quote	1
Apr	2014	VILA JIRAU	Anopheles sp.	-9.426522	-64.695708	329580	8972372.4	Third_quote	1
Apr	2014	VILA JIRAU	Anopheles sp.	-9.426522	-64.695708	329580	8972372.4	Third_quote	1
Apr	2014	VILA JIRAU	Anopheles sp.	-9.426522	-64.695708	329580	8972372.4	Third_quote	1
Apr	2014	VILA JIRAU	Anopheles sp.	-9.426522	-64.695708	329580	8972372.4	Third_quote	1
Apr	2014	VILA JIRAU	Anopheles sp.	-9.426522	-64.695708	329580	8972372.4	Third_quote	1
Apr	2014	VILA JIRAU	Anopheles sp.	-9.426522	-64.695708	329580	8972372.4	Third_quote	1
Apr	2014	VILA JIRAU	Anopheles sp.	-9.426522	-64.695708	329580	8972372.4	Third_quote	1
Apr	2014	VILA JIRAU	Anopheles sp.	-9.426522	-64.695708	329580	8972372.4	Third_quote	1
Apr	2014	VILA JIRAU	Anopheles sp.	-9.426522	-64.695708	329580	8972372.4	Third_quote	1
Apr	2014	VILA JIRAU	Anopheles sp.	-9.426522	-64.695708	329580	8972372.4	Third_quote	1
Apr	2014	VILA JIRAU	Anopheles sp.	-9.426522	-64.695708	329580	8972372.4	Third_quote	1
Apr	2014	VILA JIRAU	Anopheles sp.	-9.426522	-64.695708	329580	8972372.4	Third_quote	1
Apr	2014	VILA JIRAU	Anopheles sp.	-9.426522	-64.695708	329580	8972372.4	Third_quote	1
Apr	2014	VILA JIRAU	Anopheles sp.	-9.426522	-64.695708	329580	8972372.4	Third_quote	1
Apr	2014	VILA JIRAU	Anopheles sp.	-9.426522	-64.695708	329580	8972372.4	Third_quote	1
Apr	2014	VILA JIRAU	Anopheles sp.	-9.426522	-64.695708	329580	8972372.4	Third_quote	1
Apr	2014	VILA JIRAU	Anopheles sp.	-9.426522	-64.695708	329580	8972372.4	Third_quote	1
Apr	2014	VILA JIRAU	Anopheles sp.	-9.426522	-64.695708	329580	8972372.4	Third_quote	1
Apr	2014	VILA JIRAU	Anopheles sp.	-9.426522	-64.695708	329580	8972372.4	Third_quote	1
Apr	2014	VILA JIRAU	Anopheles sp.	-9.426522	-64.695708	329580	8972372.4	Third_quote	1
Apr	2014	VILA JIRAU	Anopheles sp.	-9.426522	-64.695708	329580	8972372.4	Third_quote	1
Apr	2014	VILA JIRAU	Anopheles sp.	-9.426522	-64.695708	329580	8972372.4	Third_quote	1
Apr	2014	VILA JIRAU	Anopheles sp.	-9.426522	-64.695708	329580	8972372.4	Third_quote	1
Apr	2014	VILA JIRAU	Anopheles sp.	-9.426522	-64.695708	329580	8972372.4	Third_quote	1
Apr	2014	VILA JIRAU	Anopheles sp.	-9.426522	-64.695708	329580	8972372.4	Third_quote	1
Apr	2014	VILA JIRAU	Anopheles sp.	-9.426522	-64.695708	329580	8972372.4	Third_quote	1
Apr	2014	VILA JIRAU	Anopheles sp.	-9.426522	-64.695708	329580	8972372.4	Third_quote	1
Apr	2014	VILA JIRAU	Anopheles sp.	-9.426522	-64.695708	329580	8972372.4	Third_quote	1
Apr	2014	VILA JIRAU	Anopheles darlingi	-9.426522	-64.695708	329580	8972372.4	Third_quote	1
Apr	2014	VILA JIRAU	Anopheles darlingi	-9.426522	-64.695708	329580	8972372.4	Third_quote	1
Apr	2014	VILA JIRAU	Anopheles darlingi	-9.426522	-64.695708	329580	8972372.4	Third_quote	1
Apr	2014	VILA JIRAU	Anopheles darlingi	-9.426522	-64.695708	329580	8972372.4	Third_quote	1
Apr	2014	VILA JIRAU	Anopheles darlingi	-9.426522	-64.695708	329580	8972372.4	Third_quote	1
Apr	2014	VILA JIRAU	Anopheles darlingi	-9.426522	-64.695708	329580	8972372.4	Third_quote	1
Apr	2014	VILA JIRAU	Anopheles darlingi	-9.426522	-64.695708	329580	8972372.4	Third_quote	1
Apr	2014	VILA JIRAU	Anopheles darlingi	-9.426522	-64.695708	329580	8972372.4	Third_quote	1
Apr	2014	VILA JIRAU	Anopheles darlingi	-9.426522	-64.695708	329580	8972372.4	Third_quote	1
Apr	2014	VILA JIRAU	Anopheles darlingi	-9.426522	-64.695708	329580	8972372.4	Third_quote	1
Apr	2014	VILA JIRAU	Anopheles darlingi	-9.426522	-64.695708	329580	8972372.4	Third_quote	1
Apr	2014	VILA JIRAU	Anopheles darlingi	-9.426522	-64.695708	329580	8972372.4	Third_quote	1
Apr	2014	VILA JIRAU	Anopheles darlingi	-9.426522	-64.695708	329580	8972372.4	Third_quote	1
Apr	2014	VILA JIRAU	Anopheles darlingi	-9.426522	-64.695708	329580	8972372.4	Third_quote	1
Apr	2014	VILA JIRAU	Anopheles darlingi	-9.426522	-64.695708	329580	8972372.4	Third_quote	1
Apr	2014	VILA JIRAU	Anopheles darlingi	-9.426522	-64.695708	329580	8972372.4	Third_quote	1
Apr	2014	VILA JIRAU	Anopheles darlingi	-9.426522	-64.695708	329580	8972372.4	Third_quote	1
Apr	2014	VILA JIRAU	Anopheles darlingi	-9.426522	-64.695708	329580	8972372.4	Third_quote	1
Apr	2014	VILA JIRAU	Anopheles darlingi	-9.426522	-64.695708	329580	8972372.4	Third_quote	1
Apr	2014	VILA JIRAU	Anopheles darlingi	-9.426522	-64.695708	329580	8972372.4	Third_quote	1
Apr	2014	VILA JIRAU	Anopheles darlingi	-9.426522	-64.695708	329580	8972372.4	Third_quote	1
Apr	2014	VILA JIRAU	Anopheles darlingi	-9.426522	-64.695708	329580	8972372.4	Third_quote	1
Apr	2014	VILA JIRAU	Anopheles darlingi	-9.426522	-64.695708	329580	8972372.4	Third_quote	1
Apr	2014	VILA JIRAU	Anopheles darlingi	-9.426522	-64.695708	329580	8972372.4	Third_quote	1
Apr	2014	VILA JIRAU	Anopheles darlingi	-9.426522	-64.695708	329580	8972372.4	Third_quote	1
Apr	2014	VILA JIRAU	Anopheles darlingi	-9.426522	-64.695708	329580	8972372.4	Third_quote	1
Apr	2014	VILA JIRAU	Anopheles darlingi	-9.426522	-64.695708	329580	8972372.4	Third_quote	1
Apr	2014	VILA JIRAU	Anopheles darlingi	-9.426522	-64.695708	329580	8972372.4	Third_quote	1
Apr	2014	VILA JIRAU	Anopheles darlingi	-9.426522	-64.695708	329580	8972372.4	Third_quote	1
Apr	2014	VILA JIRAU	Anopheles darlingi	-9.426522	-64.695708	329580	8972372.4	Third_quote	1
Apr	2014	VILA JIRAU	Anopheles darlingi	-9.426522	-64.695708	329580	8972372.4	Third_quote	1
Apr	2014	VILA JIRAU	Anopheles darlingi	-9.426522	-64.695708	329580	8972372.4	Third_quote	1
Apr	2014	VILA JIRAU	Anopheles darlingi	-9.426522	-64.695708	329580	8972372.4	Third_quote	1
Apr	2014	VILA JIRAU	Anopheles darlingi	-9.426522	-64.695708	329580	8972372.4	Third_quote	1
Apr	2014	VILA JIRAU	Anopheles darlingi	-9.426522	-64.695708	329580	8972372.4	Third_quote	1
Apr	2014	VILA JIRAU	Anopheles darlingi	-9.426522	-64.695708	329580	8972372.4	Third_quote	1
Apr	2014	VILA JIRAU	Anopheles darlingi	-9.426522	-64.695708	329580	8972372.4	Third_quote	1
Apr	2014	VILA JIRAU	Anopheles darlingi	-9.426522	-64.695708	329580	8972372.4	Third_quote	1
Apr	2014	VILA JIRAU	Anopheles darlingi	-9.426522	-64.695708	329580	8972372.4	Third_quote	1
Apr	2014	VILA JIRAU	Anopheles darlingi	-9.426522	-64.695708	329580	8972372.4	Third_quote	1
Apr	2014	VILA JIRAU	Anopheles darlingi	-9.426522	-64.695708	329580	8972372.4	Third_quote	1
Apr	2014	VILA JIRAU	Anopheles darlingi	-9.426522	-64.695708	329580	8972372.4	Third_quote	1
Apr	2014	VILA JIRAU	Anopheles darlingi	-9.426522	-64.695708	329580	8972372.4	Third_quote	1
Apr	2014	VILA JIRAU	Anopheles darlingi	-9.426522	-64.695708	329580	8972372.4	Third_quote	1
Apr	2014	VILA JIRAU	Anopheles darlingi	-9.426522	-64.695708	329580	8972372.4	Third_quote	1
Apr	2014	VILA JIRAU	Anopheles darlingi	-9.426522	-64.695708	329580	8972372.4	Third_quote	1
Apr	2014	VILA JIRAU	Anopheles darlingi	-9.426522	-64.695708	329580	8972372.4	Third_quote	1
Apr	2014	VILA JIRAU	Anopheles darlingi	-9.426522	-64.695708	329580	8972372.4	Third_quote	1
Apr	2014	VILA JIRAU	Anopheles darlingi	-9.426522	-64.695708	329580	8972372.4	Third_quote	1
Apr	2014	VILA JIRAU	Anopheles darlingi	-9.426522	-64.695708	329580	8972372.4	Third_quote	1
Apr	2014	VILA JIRAU	Anopheles darlingi	-9.426522	-64.695708	329580	8972372.4	Third_quote	1
Apr	2014	VILA JIRAU	Anopheles darlingi	-9.426522	-64.695708	329580	8972372.4	Third_quote	1
Apr	2014	VILA JIRAU	Anopheles darlingi	-9.426522	-64.695708	329580	8972372.4	Third_quote	1
Apr	2014	VILA JIRAU	Anopheles darlingi	-9.426522	-64.695708	329580	8972372.4	Third_quote	1
Apr	2014	VILA JIRAU	Anopheles darlingi	-9.426522	-64.695708	329580	8972372.4	Third_quote	1
Apr	2014	VILA JIRAU	Anopheles darlingi	-9.426522	-64.695708	329580	8972372.4	Third_quote	1
Apr	2014	VILA JIRAU	Anopheles darlingi	-9.426522	-64.695708	329580	8972372.4	Third_quote	1
Apr	2014	VILA JIRAU	Anopheles darlingi	-9.426522	-64.695708	329580	8972372.4	Third_quote	1
Apr	2014	VILA JIRAU	Anopheles darlingi	-9.426522	-64.695708	329580	8972372.4	Third_quote	1
Apr	2014	VILA JIRAU	Anopheles darlingi	-9.426522	-64.695708	329580	8972372.4	Third_quote	1
Apr	2014	VILA JIRAU	Anopheles darlingi	-9.426522	-64.695708	329580	8972372.4	Third_quote	1
Apr	2014	VILA JIRAU	Anopheles darlingi	-9.426522	-64.695708	329580	8972372.4	Third_quote	1
Apr	2014	VILA JIRAU	Anopheles darlingi	-9.426522	-64.695708	329580	8972372.4	Third_quote	1
Apr	2014	VILA JIRAU	Anopheles darlingi	-9.426522	-64.695708	329580	8972372.4	Third_quote	1
Apr	2014	VILA JIRAU	Anopheles darlingi	-9.426522	-64.695708	329580	8972372.4	Third_quote	1
Apr	2014	VILA JIRAU	Anopheles darlingi	-9.426522	-64.695708	329580	8972372.4	Third_quote	1
Apr	2014	VILA JIRAU	Anopheles darlingi	-9.426522	-64.695708	329580	8972372.4	Third_quote	1
Apr	2014	VILA JIRAU	Anopheles darlingi	-9.426522	-64.695708	329580	8972372.4	Third_quote	1
Apr	2014	VILA JIRAU	Anopheles darlingi	-9.426522	-64.695708	329580	8972372.4	Third_quote	1
Apr	2014	VILA JIRAU	Anopheles darlingi	-9.426522	-64.695708	329580	8972372.4	Third_quote	1
Apr	2014	VILA JIRAU	Anopheles darlingi	-9.426522	-64.695708	329580	8972372.4	Third_quote	1
Apr	2014	VILA JIRAU	Anopheles darlingi	-9.426522	-64.695708	329580	8972372.4	Third_quote	1
Apr	2014	VILA JIRAU	Anopheles darlingi	-9.426522	-64.695708	329580	8972372.4	Third_quote	1
Apr	2014	VILA JIRAU	Anopheles darlingi	-9.426522	-64.695708	329580	8972372.4	Third_quote	1
Apr	2014	VILA JIRAU	Anopheles darlingi	-9.426522	-64.695708	329580	8972372.4	Third_quote	1
Apr	2014	VILA JIRAU	Anopheles darlingi	-9.426522	-64.695708	329580	8972372.4	Third_quote	1
Apr	2014	VILA JIRAU	Anopheles darlingi	-9.426522	-64.695708	329580	8972372.4	Third_quote	1
Apr	2014	VILA JIRAU	Anopheles darlingi	-9.426522	-64.695708	329580	8972372.4	Third_quote	1
Apr	2014	VILA JIRAU	Anopheles darlingi	-9.426522	-64.695708	329580	8972372.4	Third_quote	1
Apr	2014	VILA JIRAU	Anopheles darlingi	-9.426522	-64.695708	329580	8972372.4	Third_quote	1
Apr	2014	VILA JIRAU	Anopheles darlingi	-9.426522	-64.695708	329580	8972372.4	Third_quote	1
Apr	2014	VILA JIRAU	Anopheles darlingi	-9.426522	-64.695708	329580	8972372.4	Third_quote	1
Apr	2014	VILA JIRAU	Anopheles darlingi	-9.426522	-64.695708	329580	8972372.4	Third_quote	1
Apr	2014	VILA JIRAU	Anopheles darlingi	-9.426522	-64.695708	329580	8972372.4	Third_quote	1
Apr	2014	VILA JIRAU	Anopheles darlingi	-9.426522	-64.695708	329580	8972372.4	Third_quote	1
Apr	2014	VILA JIRAU	Anopheles darlingi	-9.426522	-64.695708	329580	8972372.4	Third_quote	1
Apr	2014	VILA JIRAU	Anopheles darlingi	-9.426522	-64.695708	329580	8972372.4	Third_quote	1
Apr	2014	VILA JIRAU	Anopheles darlingi	-9.426522	-64.695708	329580	8972372.4	Third_quote	1
Apr	2014	VILA JIRAU	Anopheles darlingi	-9.426522	-64.695708	329580	8972372.4	Third_quote	1
Apr	2014	VILA JIRAU	Anopheles darlingi	-9.426522	-64.695708	329580	8972372.4	Third_quote	1
Apr	2014	VILA JIRAU	Anopheles darlingi	-9.426522	-64.695708	329580	8972372.4	Third_quote	1
Apr	2014	VILA JIRAU	Anopheles darlingi	-9.426522	-64.695708	329580	8972372.4	Third_quote	1
Apr	2014	VILA JIRAU	Anopheles darlingi	-9.426522	-64.695708	329580	8972372.4	Third_quote	1
Apr	2014	VILA JIRAU	Anopheles darlingi	-9.426522	-64.695708	329580	8972372.4	Third_quote	1
Apr	2014	VILA JIRAU	Anopheles darlingi	-9.426522	-64.695708	329580	8972372.4	Third_quote	1
Apr	2014	VILA JIRAU	Anopheles darlingi	-9.426522	-64.695708	329580	8972372.4	Third_quote	1
Apr	2014	POLIGONAL MARGEM ESQUERDA	Anopheles darlingi	-9.229662	-64.65125	329580	8972372.4	Third_quote	1
Apr	2014	VILA ABUNA	Anopheles darlingi	-9.676714	-65.401688	329580	8972372.4	Third_quote	1
Apr	2014	VILA ABUNA	Anopheles darlingi	-9.676714	-65.401688	329580	8972372.4	Third_quote	1
Apr	2014	VILA ABUNA	Anopheles darlingi	-9.676714	-65.401688	329580	8972372.4	Third_quote	1
Apr	2014	VILA ABUNA	Anopheles darlingi	-9.676714	-65.401688	329580	8972372.4	Third_quote	1
Apr	2014	VILA ABUNA	Anopheles darlingi	-9.676714	-65.401688	329580	8972372.4	Third_quote	1
Apr	2014	VILA ABUNA	Anopheles darlingi	-9.676714	-65.401688	329580	8972372.4	Third_quote	1
Apr	2014	VILA ABUNA	Anopheles darlingi	-9.676714	-65.401688	329580	8972372.4	Third_quote	1
Apr	2014	VILA ABUNA	Anopheles darlingi	-9.676714	-65.401688	329580	8972372.4	Third_quote	1
Apr	2014	VILA ABUNA	Anopheles darlingi	-9.676714	-65.401688	329580	8972372.4	Third_quote	1
Apr	2014	VILA ABUNA	Anopheles darlingi	-9.676714	-65.401688	329580	8972372.4	Third_quote	1
Apr	2014	VILA ABUNA	Anopheles darlingi	-9.676714	-65.401688	329580	8972372.4	Third_quote	1
Apr	2014	VILA JIRAU	Anopheles darlingi	-9.426522	-64.695708	329580	8972372.4	Third_quote	1
Apr	2014	VILA JIRAU	Anopheles darlingi	-9.426522	-64.695708	329580	8972372.4	Third_quote	1
Apr	2014	VILA JIRAU	Anopheles darlingi	-9.426522	-64.695708	329580	8972372.4	Third_quote	1
Apr	2014	VILA JIRAU	Anopheles darlingi	-9.426522	-64.695708	329580	8972372.4	Third_quote	1
Apr	2014	VILA JIRAU	Anopheles darlingi	-9.426522	-64.695708	329580	8972372.4	Third_quote	1
Apr	2014	VILA JIRAU	Anopheles darlingi	-9.426522	-64.695708	329580	8972372.4	Third_quote	1
Apr	2014	VILA JIRAU	Anopheles darlingi	-9.426522	-64.695708	329580	8972372.4	Third_quote	1
Apr	2014	VILA JIRAU	Anopheles darlingi	-9.426522	-64.695708	329580	8972372.4	Third_quote	1
Apr	2014	VILA JIRAU	Anopheles darlingi	-9.426522	-64.695708	329580	8972372.4	Third_quote	1
Apr	2014	VILA JIRAU	Anopheles darlingi	-9.426522	-64.695708	329580	8972372.4	Third_quote	1
Apr	2014	VILA JIRAU	Anopheles darlingi	-9.426522	-64.695708	329580	8972372.4	Third_quote	1
Apr	2014	VILA JIRAU	Anopheles darlingi	-9.426522	-64.695708	329580	8972372.4	Third_quote	1
Apr	2014	VILA JIRAU	Anopheles darlingi	-9.426522	-64.695708	329580	8972372.4	Third_quote	1
Apr	2014	VILA JIRAU	Anopheles darlingi	-9.426522	-64.695708	329580	8972372.4	Third_quote	1
Apr	2014	VILA JIRAU	Anopheles darlingi	-9.426522	-64.695708	329580	8972372.4	Third_quote	1
Apr	2014	VILA JIRAU	Anopheles darlingi	-9.426522	-64.695708	329580	8972372.4	Third_quote	1
Apr	2014	VILA JIRAU	Anopheles darlingi	-9.426522	-64.695708	329580	8972372.4	Third_quote	1
Apr	2014	VILA JIRAU	Anopheles darlingi	-9.426522	-64.695708	329580	8972372.4	Third_quote	1
Apr	2014	VILA JIRAU	Anopheles darlingi	-9.426522	-64.695708	329580	8972372.4	Third_quote	1
Apr	2014	VILA JIRAU	Anopheles darlingi	-9.426522	-64.695708	329580	8972372.4	Third_quote	1
Apr	2014	VILA JIRAU	Anopheles darlingi	-9.426522	-64.695708	329580	8972372.4	Third_quote	1
Apr	2014	VILA JIRAU	Anopheles darlingi	-9.426522	-64.695708	329580	8972372.4	Third_quote	1
Apr	2014	VILA JIRAU	Anopheles darlingi	-9.426522	-64.695708	329580	8972372.4	Third_quote	1
Apr	2014	VILA JIRAU	Anopheles darlingi	-9.426522	-64.695708	329580	8972372.4	Third_quote	1
Apr	2014	VILA JIRAU	Anopheles darlingi	-9.426522	-64.695708	329580	8972372.4	Third_quote	1
Apr	2014	VILA JIRAU	Anopheles darlingi	-9.426522	-64.695708	329580	8972372.4	Third_quote	1
Apr	2014	VILA JIRAU	Anopheles darlingi	-9.426522	-64.695708	329580	8972372.4	Third_quote	1
Apr	2014	VILA JIRAU	Anopheles darlingi	-9.426522	-64.695708	329580	8972372.4	Third_quote	1
Apr	2014	VILA JIRAU	Anopheles darlingi	-9.426522	-64.695708	329580	8972372.4	Third_quote	1
Apr	2014	VILA JIRAU	Anopheles darlingi	-9.426522	-64.695708	329580	8972372.4	Third_quote	1
Apr	2014	VILA JIRAU	Anopheles darlingi	-9.426522	-64.695708	329580	8972372.4	Third_quote	1
Apr	2014	VILA JIRAU	Anopheles darlingi	-9.426522	-64.695708	329580	8972372.4	Third_quote	1
Apr	2014	VILA JIRAU	Anopheles darlingi	-9.426522	-64.695708	329580	8972372.4	Third_quote	1
Apr	2014	VILA JIRAU	Anopheles darlingi	-9.426522	-64.695708	329580	8972372.4	Third_quote	1
Apr	2014	VILA JIRAU	Anopheles darlingi	-9.426522	-64.695708	329580	8972372.4	Third_quote	1
Apr	2014	VILA JIRAU	Anopheles darlingi	-9.426522	-64.695708	329580	8972372.4	Third_quote	1
Apr	2014	VILA JIRAU	Anopheles darlingi	-9.426522	-64.695708	329580	8972372.4	Third_quote	1
Apr	2014	VILA JIRAU	Anopheles darlingi	-9.426522	-64.695708	329580	8972372.4	Third_quote	1
Apr	2014	VILA JIRAU	Anopheles darlingi	-9.426522	-64.695708	329580	8972372.4	Third_quote	1
Apr	2014	VILA JIRAU	Anopheles darlingi	-9.426522	-64.695708	329580	8972372.4	Third_quote	1
Apr	2014	VILA JIRAU	Anopheles darlingi	-9.426522	-64.695708	329580	8972372.4	Third_quote	1
Apr	2014	VILA JIRAU	Anopheles darlingi	-9.426522	-64.695708	329580	8972372.4	Third_quote	1
Apr	2014	VILA JIRAU	Anopheles darlingi	-9.426522	-64.695708	329580	8972372.4	Third_quote	1
Apr	2014	VILA JIRAU	Anopheles darlingi	-9.426522	-64.695708	329580	8972372.4	Third_quote	1
Apr	2014	VILA JIRAU	Anopheles darlingi	-9.426522	-64.695708	329580	8972372.4	Third_quote	1
Apr	2014	VILA JIRAU	Anopheles darlingi	-9.426522	-64.695708	329580	8972372.4	Third_quote	1
Apr	2014	VILA JIRAU	Anopheles darlingi	-9.426522	-64.695708	329580	8972372.4	Third_quote	1
Apr	2014	VILA JIRAU	Anopheles darlingi	-9.426522	-64.695708	329580	8972372.4	Third_quote	1
Apr	2014	VILA JIRAU	Anopheles darlingi	-9.426522	-64.695708	329580	8972372.4	Third_quote	1
Apr	2014	VILA JIRAU	Anopheles darlingi	-9.426522	-64.695708	329580	8972372.4	Third_quote	1
Apr	2014	VILA JIRAU	Anopheles darlingi	-9.426522	-64.695708	329580	8972372.4	Third_quote	1
Apr	2014	VILA JIRAU	Anopheles darlingi	-9.426522	-64.695708	329580	8972372.4	Third_quote	1
Apr	2014	VILA JIRAU	Anopheles darlingi	-9.426522	-64.695708	329580	8972372.4	Third_quote	1
Apr	2014	VILA JIRAU	Anopheles darlingi	-9.426522	-64.695708	329580	8972372.4	Third_quote	1
Apr	2014	VILA JIRAU	Anopheles darlingi	-9.426522	-64.695708	329580	8972372.4	Third_quote	1
Apr	2014	VILA JIRAU	Anopheles darlingi	-9.426522	-64.695708	329580	8972372.4	Third_quote	1
Apr	2014	VILA JIRAU	Anopheles darlingi	-9.426522	-64.695708	329580	8972372.4	Third_quote	1
Apr	2014	VILA JIRAU	Anopheles darlingi	-9.426522	-64.695708	329580	8972372.4	Third_quote	1
Apr	2014	VILA JIRAU	Anopheles darlingi	-9.426522	-64.695708	329580	8972372.4	Third_quote	1
Apr	2014	VILA JIRAU	Anopheles darlingi	-9.426522	-64.695708	329580	8972372.4	Third_quote	1
Apr	2014	VILA JIRAU	Anopheles darlingi	-9.426522	-64.695708	329580	8972372.4	Third_quote	1
Apr	2014	VILA JIRAU	Anopheles darlingi	-9.426522	-64.695708	329580	8972372.4	Third_quote	1
Apr	2014	VILA JIRAU	Anopheles darlingi	-9.426522	-64.695708	329580	8972372.4	Third_quote	1
Apr	2014	VILA JIRAU	Anopheles darlingi	-9.426522	-64.695708	329580	8972372.4	Third_quote	1
Apr	2014	VILA JIRAU	Anopheles darlingi	-9.426522	-64.695708	329580	8972372.4	Third_quote	1
Apr	2014	VILA JIRAU	Anopheles darlingi	-9.426522	-64.695708	329580	8972372.4	Third_quote	1
Apr	2014	VILA JIRAU	Anopheles darlingi	-9.426522	-64.695708	329580	8972372.4	Third_quote	1
Apr	2014	VILA JIRAU	Anopheles darlingi	-9.426522	-64.695708	329580	8972372.4	Third_quote	1
Apr	2014	VILA JIRAU	Anopheles darlingi	-9.426522	-64.695708	329580	8972372.4	Third_quote	1
Apr	2014	VILA JIRAU	Anopheles darlingi	-9.426522	-64.695708	329580	8972372.4	Third_quote	1
Apr	2014	VILA JIRAU	Anopheles darlingi	-9.426522	-64.695708	329580	8972372.4	Third_quote	1
Apr	2014	VILA JIRAU	Anopheles darlingi	-9.426522	-64.695708	329580	8972372.4	Third_quote	1
Apr	2014	VILA JIRAU	Anopheles darlingi	-9.426522	-64.695708	329580	8972372.4	Third_quote	1
Apr	2014	VILA JIRAU	Anopheles darlingi	-9.426522	-64.695708	329580	8972372.4	Third_quote	1
Apr	2014	VILA JIRAU	Anopheles darlingi	-9.426522	-64.695708	329580	8972372.4	Third_quote	1
Apr	2014	VILA JIRAU	Anopheles darlingi	-9.426522	-64.695708	329580	8972372.4	Third_quote	1
Apr	2014	VILA JIRAU	Anopheles darlingi	-9.426522	-64.695708	329580	8972372.4	Third_quote	1
Apr	2014	VILA JIRAU	Anopheles darlingi	-9.426522	-64.695708	329580	8972372.4	Third_quote	1
Apr	2014	VILA JIRAU	Anopheles darlingi	-9.426522	-64.695708	329580	8972372.4	Third_quote	1
Apr	2014	VILA JIRAU	Anopheles darlingi	-9.426522	-64.695708	329580	8972372.4	Third_quote	1
Apr	2014	VILA JIRAU	Anopheles darlingi	-9.426522	-64.695708	329580	8972372.4	Third_quote	1
Apr	2014	VILA JIRAU	Anopheles darlingi	-9.426522	-64.695708	329580	8972372.4	Third_quote	1
Apr	2014	VILA JIRAU	Anopheles darlingi	-9.426522	-64.695708	329580	8972372.4	Third_quote	1
Apr	2014	VILA JIRAU	Anopheles darlingi	-9.426522	-64.695708	329580	8972372.4	Third_quote	1
Apr	2014	VILA JIRAU	Anopheles darlingi	-9.426522	-64.695708	329580	8972372.4	Third_quote	1
Apr	2014	VILA JIRAU	Anopheles darlingi	-9.426522	-64.695708	329580	8972372.4	Third_quote	1
Apr	2014	VILA JIRAU	Anopheles darlingi	-9.426522	-64.695708	329580	8972372.4	Third_quote	1
Apr	2014	VILA JIRAU	Anopheles darlingi	-9.426522	-64.695708	329580	8972372.4	Third_quote	1
Apr	2014	VILA JIRAU	Anopheles darlingi	-9.426522	-64.695708	329580	8972372.4	Third_quote	1
Apr	2014	VILA JIRAU	Anopheles darlingi	-9.426522	-64.695708	329580	8972372.4	Third_quote	1
Apr	2014	VILA JIRAU	Anopheles darlingi	-9.426522	-64.695708	329580	8972372.4	Third_quote	1
Apr	2014	VILA JIRAU	Anopheles darlingi	-9.426522	-64.695708	329580	8972372.4	Third_quote	1
Apr	2014	VILA JIRAU	Anopheles darlingi	-9.426522	-64.695708	329580	8972372.4	Third_quote	1
Apr	2014	VILA JIRAU	Anopheles darlingi	-9.426522	-64.695708	329580	8972372.4	Third_quote	1
Apr	2014	VILA JIRAU	Anopheles darlingi	-9.426522	-64.695708	329580	8972372.4	Third_quote	1
Apr	2014	VILA JIRAU	Anopheles darlingi	-9.426522	-64.695708	329580	8972372.4	Third_quote	1
Apr	2014	VILA JIRAU	Anopheles darlingi	-9.426522	-64.695708	329580	8972372.4	Third_quote	1
Apr	2014	VILA JIRAU	Anopheles darlingi	-9.426522	-64.695708	329580	8972372.4	Third_quote	1
Apr	2014	VILA JIRAU	Anopheles darlingi	-9.426522	-64.695708	329580	8972372.4	Third_quote	1
Apr	2014	VILA JIRAU	Anopheles darlingi	-9.426522	-64.695708	329580	8972372.4	Third_quote	1
Apr	2014	VILA JIRAU	Anopheles darlingi	-9.426522	-64.695708	329580	8972372.4	Third_quote	1
Apr	2014	VILA JIRAU	Anopheles darlingi	-9.426522	-64.695708	329580	8972372.4	Third_quote	1
Apr	2014	VILA JIRAU	Anopheles darlingi	-9.426522	-64.695708	329580	8972372.4	Third_quote	1
Apr	2014	VILA JIRAU	Anopheles darlingi	-9.426522	-64.695708	329580	8972372.4	Third_quote	1
Apr	2014	VILA JIRAU	Anopheles darlingi	-9.426522	-64.695708	329580	8972372.4	Third_quote	1
Apr	2014	VILA JIRAU	Anopheles darlingi	-9.426522	-64.695708	329580	8972372.4	Third_quote	1
Apr	2014	VILA JIRAU	Anopheles darlingi	-9.426522	-64.695708	329580	8972372.4	Third_quote	1
Apr	2014	VILA JIRAU	Anopheles darlingi	-9.426522	-64.695708	329580	8972372.4	Third_quote	1
Apr	2014	VILA JIRAU	Anopheles darlingi	-9.426522	-64.695708	329580	8972372.4	Third_quote	1
Apr	2014	VILA JIRAU	Anopheles darlingi	-9.426522	-64.695708	329580	8972372.4	Third_quote	1
Apr	2014	VILA JIRAU	Anopheles darlingi	-9.426522	-64.695708	329580	8972372.4	Third_quote	1
Apr	2014	VILA JIRAU	Anopheles darlingi	-9.426522	-64.695708	329580	8972372.4	Third_quote	1
Apr	2014	VILA JIRAU	Anopheles darlingi	-9.426522	-64.695708	329580	8972372.4	Third_quote	1
Apr	2014	VILA JIRAU	Anopheles darlingi	-9.426522	-64.695708	329580	8972372.4	Third_quote	1
Apr	2014	VILA JIRAU	Anopheles darlingi	-9.426522	-64.695708	329580	8972372.4	Third_quote	1
Apr	2014	VILA JIRAU	Anopheles sp.	-9.426522	-64.695708	329580	8972372.4	Third_quote	1
Apr	2014	VILA JIRAU	Anopheles sp.	-9.426522	-64.695708	329580	8972372.4	Third_quote	1
Apr	2014	VILA JIRAU	Anopheles sp.	-9.426522	-64.695708	329580	8972372.4	Third_quote	1
Apr	2014	VILA JIRAU	Anopheles sp.	-9.426522	-64.695708	329580	8972372.4	Third_quote	1
Apr	2014	VILA JIRAU	Anopheles sp.	-9.426522	-64.695708	329580	8972372.4	Third_quote	1
Apr	2014	VILA JIRAU	Anopheles sp.	-9.426522	-64.695708	329580	8972372.4	Third_quote	1
Apr	2014	VILA JIRAU	Anopheles sp.	-9.426522	-64.695708	329580	8972372.4	Third_quote	1
Apr	2014	VILA JIRAU	Anopheles sp.	-9.426522	-64.695708	329580	8972372.4	Third_quote	1
Apr	2014	VILA JIRAU	Anopheles sp.	-9.426522	-64.695708	329580	8972372.4	Third_quote	1
Apr	2014	VILA JIRAU	Anopheles sp.	-9.426522	-64.695708	329580	8972372.4	Third_quote	1
Apr	2014	VILA JIRAU	Anopheles sp.	-9.426522	-64.695708	329580	8972372.4	Third_quote	1
Apr	2014	VILA JIRAU	Anopheles sp.	-9.426522	-64.695708	329580	8972372.4	Third_quote	1
Apr	2014	VILA JIRAU	Anopheles sp.	-9.426522	-64.695708	329580	8972372.4	Third_quote	1
Apr	2014	VILA JIRAU	Anopheles sp.	-9.426522	-64.695708	329580	8972372.4	Third_quote	1
Apr	2014	VILA JIRAU	Anopheles darlingi	-9.426522	-64.695708	329580	8972372.4	Third_quote	1
Apr	2014	VILA JIRAU	Anopheles darlingi	-9.426522	-64.695708	329580	8972372.4	Third_quote	1
Apr	2014	VILA JIRAU	Anopheles darlingi	-9.426522	-64.695708	329580	8972372.4	Third_quote	1
Apr	2014	VILA JIRAU	Anopheles darlingi	-9.426522	-64.695708	329580	8972372.4	Third_quote	1
Apr	2014	VILA JIRAU	Anopheles darlingi	-9.426522	-64.695708	329580	8972372.4	Third_quote	1
Apr	2014	VILA JIRAU	Anopheles darlingi	-9.426522	-64.695708	329580	8972372.4	Third_quote	1
Apr	2014	VILA JIRAU	Anopheles darlingi	-9.426522	-64.695708	329580	8972372.4	Third_quote	1
Apr	2014	VILA JIRAU	Anopheles darlingi	-9.426522	-64.695708	329580	8972372.4	Third_quote	1
Apr	2014	VILA JIRAU	Anopheles darlingi	-9.426522	-64.695708	329580	8972372.4	Third_quote	1
Apr	2014	VILA JIRAU	Anopheles darlingi	-9.426522	-64.695708	329580	8972372.4	Third_quote	1
Apr	2014	VILA JIRAU	Anopheles darlingi	-9.426522	-64.695708	329580	8972372.4	Third_quote	1
Apr	2014	VILA JIRAU	Anopheles darlingi	-9.426522	-64.695708	329580	8972372.4	Third_quote	1
Apr	2014	VILA JIRAU	Anopheles darlingi	-9.426522	-64.695708	329580	8972372.4	Third_quote	1
Apr	2014	VILA JIRAU	Anopheles darlingi	-9.426522	-64.695708	329580	8972372.4	Third_quote	1
Apr	2014	VILA JIRAU	Anopheles darlingi	-9.426522	-64.695708	329580	8972372.4	Third_quote	1
Apr	2014	VILA JIRAU	Anopheles darlingi	-9.426522	-64.695708	329580	8972372.4	Third_quote	1
Apr	2014	VILA JIRAU	Anopheles darlingi	-9.426522	-64.695708	329580	8972372.4	Third_quote	1
Apr	2014	VILA JIRAU	Anopheles darlingi	-9.426522	-64.695708	329580	8972372.4	Third_quote	1
Apr	2014	VILA JIRAU	Anopheles darlingi	-9.426522	-64.695708	329580	8972372.4	Third_quote	1
Apr	2014	VILA JIRAU	Anopheles darlingi	-9.426522	-64.695708	329580	8972372.4	Third_quote	1
Apr	2014	VILA JIRAU	Anopheles darlingi	-9.426522	-64.695708	329580	8972372.4	Third_quote	1
Apr	2014	VILA JIRAU	Anopheles darlingi	-9.426522	-64.695708	329580	8972372.4	Third_quote	1
Apr	2014	VILA JIRAU	Anopheles darlingi	-9.426522	-64.695708	329580	8972372.4	Third_quote	1
Apr	2014	VILA JIRAU	Anopheles darlingi	-9.426522	-64.695708	329580	8972372.4	Third_quote	1
Apr	2014	VILA JIRAU	Anopheles darlingi	-9.426522	-64.695708	329580	8972372.4	Third_quote	1
Apr	2014	VILA JIRAU	Anopheles darlingi	-9.426522	-64.695708	329580	8972372.4	Third_quote	1
Apr	2014	VILA JIRAU	Anopheles darlingi	-9.426522	-64.695708	329580	8972372.4	Third_quote	1
Apr	2014	VILA ABUNA	Anopheles darlingi	-9.676714	-65.401688	329580	8972372.4	Third_quote	1
Apr	2014	VILA ABUNA	Anopheles darlingi	-9.676714	-65.401688	329580	8972372.4	Third_quote	1
Apr	2014	VILA ABUNA	Anopheles darlingi	-9.676714	-65.401688	329580	8972372.4	Third_quote	1
Apr	2014	VILA ABUNA	Anopheles darlingi	-9.676714	-65.401688	329580	8972372.4	Third_quote	1
Apr	2014	VILA ABUNA	Anopheles darlingi	-9.676714	-65.401688	329580	8972372.4	Third_quote	1
Apr	2014	VILA ABUNA	Anopheles darlingi	-9.676714	-65.401688	329580	8972372.4	Third_quote	1
Apr	2014	VILA ABUNA	Anopheles darlingi	-9.676714	-65.401688	329580	8972372.4	Third_quote	1
Apr	2014	VILA ABUNA	Anopheles darlingi	-9.676714	-65.401688	329580	8972372.4	Third_quote	1
Apr	2014	VILA ABUNA	Anopheles darlingi	-9.676714	-65.401688	329580	8972372.4	Third_quote	1
Apr	2014	VILA ABUNA	Anopheles darlingi	-9.676714	-65.401688	329580	8972372.4	Third_quote	1
Apr	2014	VILA ABUNA	Anopheles sp.	-9.676714	-65.401688	329580	8972372.4	Third_quote	1
Apr	2014	VILA ABUNA	Anopheles sp.	-9.676714	-65.401688	329580	8972372.4	Third_quote	1
Apr	2014	VILA ABUNA	Anopheles sp.	-9.676714	-65.401688	329580	8972372.4	Third_quote	1
Apr	2014	VILA JIRAU	Anopheles darlingi	-9.426522	-64.695708	329580	8972372.4	Third_quote	1
Apr	2014	VILA JIRAU	Anopheles darlingi	-9.426522	-64.695708	329580	8972372.4	Third_quote	1
Apr	2014	VILA JIRAU	Anopheles darlingi	-9.426522	-64.695708	329580	8972372.4	Third_quote	1
Apr	2014	VILA JIRAU	Anopheles darlingi	-9.426522	-64.695708	329580	8972372.4	Third_quote	1
Apr	2014	VILA JIRAU	Anopheles darlingi	-9.426522	-64.695708	329580	8972372.4	Third_quote	1
Apr	2014	VILA JIRAU	Anopheles darlingi	-9.426522	-64.695708	329580	8972372.4	Third_quote	1
Apr	2014	VILA JIRAU	Anopheles darlingi	-9.426522	-64.695708	329580	8972372.4	Third_quote	1
Apr	2014	VILA JIRAU	Anopheles darlingi	-9.426522	-64.695708	329580	8972372.4	Third_quote	1
Apr	2014	VILA JIRAU	Anopheles darlingi	-9.426522	-64.695708	329580	8972372.4	Third_quote	1
Apr	2014	VILA JIRAU	Anopheles darlingi	-9.426522	-64.695708	329580	8972372.4	Third_quote	1
Apr	2014	VILA JIRAU	Anopheles darlingi	-9.426522	-64.695708	329580	8972372.4	Third_quote	1
Apr	2014	VILA JIRAU	Anopheles darlingi	-9.426522	-64.695708	329580	8972372.4	Third_quote	1
Apr	2014	VILA JIRAU	Anopheles darlingi	-9.426522	-64.695708	329580	8972372.4	Third_quote	1
Apr	2014	VILA JIRAU	Anopheles darlingi	-9.426522	-64.695708	329580	8972372.4	Third_quote	1
Apr	2014	VILA JIRAU	Anopheles darlingi	-9.426522	-64.695708	329580	8972372.4	Third_quote	1
Apr	2014	VILA JIRAU	Anopheles darlingi	-9.426522	-64.695708	329580	8972372.4	Third_quote	1
Apr	2014	VILA JIRAU	Anopheles darlingi	-9.426522	-64.695708	329580	8972372.4	Third_quote	1
Apr	2014	VILA JIRAU	Anopheles darlingi	-9.426522	-64.695708	329580	8972372.4	Third_quote	1
Apr	2014	VILA JIRAU	Anopheles darlingi	-9.426522	-64.695708	329580	8972372.4	Third_quote	1
Apr	2014	VILA JIRAU	Anopheles darlingi	-9.426522	-64.695708	329580	8972372.4	Third_quote	1
Apr	2014	VILA JIRAU	Anopheles darlingi	-9.426522	-64.695708	329580	8972372.4	Third_quote	1
Apr	2014	VILA JIRAU	Anopheles darlingi	-9.426522	-64.695708	329580	8972372.4	Third_quote	1
Apr	2014	VILA JIRAU	Anopheles darlingi	-9.426522	-64.695708	329580	8972372.4	Third_quote	1
Apr	2014	VILA JIRAU	Anopheles darlingi	-9.426522	-64.695708	329580	8972372.4	Third_quote	1
Apr	2014	VILA JIRAU	Anopheles darlingi	-9.426522	-64.695708	329580	8972372.4	Third_quote	1
Apr	2014	VILA JIRAU	Anopheles darlingi	-9.426522	-64.695708	329580	8972372.4	Third_quote	1
Apr	2014	VILA JIRAU	Anopheles darlingi	-9.426522	-64.695708	329580	8972372.4	Third_quote	1
Apr	2014	POLIGONAL MARGEM DIREITA	Anopheles darlingi	-9.245362	-64.613768	329580	8972372.4	Third_quote	1
Apr	2014	POLIGONAL MARGEM DIREITA	Anopheles darlingi	-9.245362	-64.613768	329580	8972372.4	Third_quote	1
Apr	2014	POLIGONAL MARGEM DIREITA	Anopheles darlingi	-9.245362	-64.613768	329580	8972372.4	Third_quote	1
Apr	2014	POLIGONAL MARGEM DIREITA	Anopheles darlingi	-9.245362	-64.613768	329580	8972372.4	Third_quote	1
Apr	2014	POLIGONAL MARGEM DIREITA	Anopheles darlingi	-9.245362	-64.613768	329580	8972372.4	Third_quote	1
Apr	2014	POLIGONAL MARGEM DIREITA	Anopheles darlingi	-9.245362	-64.613768	329580	8972372.4	Third_quote	1
Apr	2014	POLIGONAL MARGEM DIREITA	Anopheles darlingi	-9.245362	-64.613768	329580	8972372.4	Third_quote	1
Apr	2014	POLIGONAL MARGEM DIREITA	Anopheles darlingi	-9.245362	-64.613768	329580	8972372.4	Third_quote	1
Apr	2014	POLIGONAL MARGEM DIREITA	Anopheles sp.	-9.245362	-64.613768	329580	8972372.4	Third_quote	1
Apr	2014	POLIGONAL MARGEM ESQUERDA	Anopheles darlingi	-9.229662	-64.65125	329580	8972372.4	Third_quote	1
Apr	2014	POLIGONAL MARGEM ESQUERDA	Anopheles darlingi	-9.229662	-64.65125	329580	8972372.4	Third_quote	1
Apr	2014	POLIGONAL MARGEM ESQUERDA	Anopheles darlingi	-9.229662	-64.65125	329580	8972372.4	Third_quote	1
Apr	2014	POLIGONAL MARGEM ESQUERDA	Anopheles darlingi	-9.229662	-64.65125	329580	8972372.4	Third_quote	1
Apr	2014	POLIGONAL MARGEM ESQUERDA	Anopheles darlingi	-9.229662	-64.65125	329580	8972372.4	Third_quote	1
Apr	2014	POLIGONAL MARGEM ESQUERDA	Anopheles darlingi	-9.229662	-64.65125	329580	8972372.4	Third_quote	1
Apr	2014	POLIGONAL MARGEM ESQUERDA	Anopheles darlingi	-9.229662	-64.65125	329580	8972372.4	Third_quote	1
Apr	2014	POLIGONAL MARGEM ESQUERDA	Anopheles darlingi	-9.229662	-64.65125	329580	8972372.4	Third_quote	1
Apr	2014	POLIGONAL MARGEM ESQUERDA	Anopheles darlingi	-9.229662	-64.65125	329580	8972372.4	Third_quote	1
Apr	2014	POLIGONAL MARGEM ESQUERDA	Anopheles darlingi	-9.229662	-64.65125	329580	8972372.4	Third_quote	1
Apr	2014	POLIGONAL MARGEM ESQUERDA	Anopheles darlingi	-9.229662	-64.65125	329580	8972372.4	Third_quote	1
Apr	2014	POLIGONAL MARGEM ESQUERDA	Anopheles darlingi	-9.229662	-64.65125	329580	8972372.4	Third_quote	1
Apr	2014	POLIGONAL MARGEM ESQUERDA	Anopheles darlingi	-9.229662	-64.65125	329580	8972372.4	Third_quote	1
Apr	2014	POLIGONAL MARGEM ESQUERDA	Anopheles darlingi	-9.229662	-64.65125	329580	8972372.4	Third_quote	1
Apr	2014	POLIGONAL MARGEM ESQUERDA	Anopheles darlingi	-9.229662	-64.65125	329580	8972372.4	Third_quote	1
Apr	2014	POLIGONAL MARGEM ESQUERDA	Anopheles darlingi	-9.229662	-64.65125	329580	8972372.4	Third_quote	1
Apr	2014	POLIGONAL MARGEM ESQUERDA	Anopheles darlingi	-9.229662	-64.65125	329580	8972372.4	Third_quote	1
Apr	2014	POLIGONAL MARGEM DIREITA	Anopheles darlingi	-9.245362	-64.613768	329580	8972372.4	Third_quote	1
Apr	2014	POLIGONAL MARGEM DIREITA	Anopheles darlingi	-9.245362	-64.613768	329580	8972372.4	Third_quote	1
Apr	2014	POLIGONAL MARGEM DIREITA	Anopheles sp.	-9.245362	-64.613768	329580	8972372.4	Third_quote	1
Apr	2014	POLIGONAL MARGEM DIREITA	Anopheles sp.	-9.245362	-64.613768	329580	8972372.4	Third_quote	1
Apr	2014	JACI PARANA	Anopheles darlingi	-9.259651	-64.395767	329580	8972372.4	Third_quote	1
Apr	2014	JACI PARANA	Anopheles darlingi	-9.259651	-64.395767	329580	8972372.4	Third_quote	1
Apr	2014	JACI PARANA	Anopheles darlingi	-9.259651	-64.395767	329580	8972372.4	Third_quote	1
Apr	2014	POLIGONAL MARGEM ESQUERDA	Anopheles sp.	-9.229662	-64.65125	329580	8972372.4	Third_quote	1
Apr	2014	POLIGONAL MARGEM ESQUERDA	Anopheles darlingi	-9.229662	-64.65125	329580	8972372.4	Third_quote	1
Apr	2014	POLIGONAL MARGEM ESQUERDA	Anopheles darlingi	-9.229662	-64.65125	329580	8972372.4	Third_quote	1
Apr	2014	POLIGONAL MARGEM ESQUERDA	Anopheles darlingi	-9.229662	-64.65125	329580	8972372.4	Third_quote	1
Apr	2014	POLIGONAL MARGEM ESQUERDA	Anopheles darlingi	-9.229662	-64.65125	329580	8972372.4	Third_quote	1
Apr	2014	POLIGONAL MARGEM ESQUERDA	Anopheles darlingi	-9.229662	-64.65125	329580	8972372.4	Third_quote	1
Apr	2014	POLIGONAL MARGEM ESQUERDA	Anopheles darlingi	-9.229662	-64.65125	329580	8972372.4	Third_quote	1
Apr	2014	POLIGONAL MARGEM ESQUERDA	Anopheles darlingi	-9.229662	-64.65125	329580	8972372.4	Third_quote	1
Apr	2014	POLIGONAL MARGEM ESQUERDA	Anopheles darlingi	-9.229662	-64.65125	329580	8972372.4	Third_quote	1
Apr	2014	POLIGONAL MARGEM ESQUERDA	Anopheles darlingi	-9.229662	-64.65125	329580	8972372.4	Third_quote	1
Apr	2014	POLIGONAL MARGEM ESQUERDA	Anopheles darlingi	-9.229662	-64.65125	329580	8972372.4	Third_quote	1
Apr	2014	POLIGONAL MARGEM ESQUERDA	Anopheles darlingi	-9.229662	-64.65125	329580	8972372.4	Third_quote	1
Apr	2014	VILA JIRAU	Anopheles konderi	-9.426522	-64.695708	329580	8972372.4	Third_quote	1
Apr	2014	VILA JIRAU	Anopheles konderi	-9.426522	-64.695708	329580	8972372.4	Third_quote	1
Apr	2014	VILA JIRAU	Anopheles darlingi	-9.426522	-64.695708	329580	8972372.4	Third_quote	1
Apr	2014	VILA JIRAU	Anopheles darlingi	-9.426522	-64.695708	329580	8972372.4	Third_quote	1
Apr	2014	VILA JIRAU	Anopheles darlingi	-9.426522	-64.695708	329580	8972372.4	Third_quote	1
Apr	2014	VILA JIRAU	Anopheles darlingi	-9.426522	-64.695708	329580	8972372.4	Third_quote	1
Apr	2014	VILA ABUNA	Anopheles konderi	-9.676714	-65.401688	329580	8972372.4	Third_quote	1
Apr	2014	VILA ABUNA	Anopheles darlingi	-9.676714	-65.401688	329580	8972372.4	Third_quote	1
Apr	2014	VILA ABUNA	Anopheles darlingi	-9.676714	-65.401688	329580	8972372.4	Third_quote	1
Apr	2014	VILA ABUNA	Anopheles darlingi	-9.676714	-65.401688	329580	8972372.4	Third_quote	1
Apr	2014	VILA ABUNA	Anopheles darlingi	-9.676714	-65.401688	329580	8972372.4	Third_quote	1
Apr	2014	VILA ABUNA	Anopheles darlingi	-9.676714	-65.401688	329580	8972372.4	Third_quote	1
Apr	2014	VILA ABUNA	Anopheles darlingi	-9.676714	-65.401688	329580	8972372.4	Third_quote	1
Apr	2014	VILA ABUNA	Anopheles darlingi	-9.676714	-65.401688	329580	8972372.4	Third_quote	1
Apr	2014	VILA ABUNA	Anopheles darlingi	-9.676714	-65.401688	329580	8972372.4	Third_quote	1
Apr	2014	VILA ABUNA	Anopheles darlingi	-9.676714	-65.401688	329580	8972372.4	Third_quote	1
Apr	2014	VILA ABUNA	Anopheles darlingi	-9.676714	-65.401688	329580	8972372.4	Third_quote	1
Apr	2014	VILA ABUNA	Anopheles darlingi	-9.676714	-65.401688	329580	8972372.4	Third_quote	1
Apr	2014	VILA ABUNA	Anopheles darlingi	-9.676714	-65.401688	329580	8972372.4	Third_quote	1
Apr	2014	VILA ABUNA	Anopheles darlingi	-9.676714	-65.401688	329580	8972372.4	Third_quote	1
Apr	2014	VILA ABUNA	Anopheles darlingi	-9.676714	-65.401688	329580	8972372.4	Third_quote	1
Apr	2014	VILA ABUNA	Anopheles darlingi	-9.676714	-65.401688	329580	8972372.4	Third_quote	1
Apr	2014	VILA ABUNA	Anopheles darlingi	-9.676714	-65.401688	329580	8972372.4	Third_quote	1
Apr	2014	VILA ABUNA	Anopheles darlingi	-9.676714	-65.401688	329580	8972372.4	Third_quote	1
Apr	2014	VILA ABUNA	Anopheles darlingi	-9.676714	-65.401688	329580	8972372.4	Third_quote	1
Apr	2014	VILA ABUNA	Anopheles darlingi	-9.676714	-65.401688	329580	8972372.4	Third_quote	1
Apr	2014	VILA ABUNA	Anopheles darlingi	-9.676714	-65.401688	329580	8972372.4	Third_quote	1
Apr	2014	VILA ABUNA	Anopheles darlingi	-9.676714	-65.401688	329580	8972372.4	Third_quote	1
Apr	2014	VILA JIRAU	Anopheles darlingi	-9.426522	-64.695708	329580	8972372.4	Third_quote	1
Apr	2014	VILA JIRAU	Anopheles darlingi	-9.426522	-64.695708	329580	8972372.4	Third_quote	1
Apr	2014	VILA JIRAU	Anopheles darlingi	-9.426522	-64.695708	329580	8972372.4	Third_quote	1
Apr	2014	VILA JIRAU	Anopheles darlingi	-9.426522	-64.695708	329580	8972372.4	Third_quote	1
Apr	2014	VILA JIRAU	Anopheles darlingi	-9.426522	-64.695708	329580	8972372.4	Third_quote	1
Apr	2014	VILA JIRAU	Anopheles darlingi	-9.426522	-64.695708	329580	8972372.4	Third_quote	1
Apr	2014	VILA JIRAU	Anopheles darlingi	-9.426522	-64.695708	329580	8972372.4	Third_quote	1
Apr	2014	VILA JIRAU	Anopheles darlingi	-9.426522	-64.695708	329580	8972372.4	Third_quote	1
Apr	2014	VILA JIRAU	Anopheles darlingi	-9.426522	-64.695708	329580	8972372.4	Third_quote	1
Apr	2014	VILA JIRAU	Anopheles darlingi	-9.426522	-64.695708	329580	8972372.4	Third_quote	1
Apr	2014	VILA JIRAU	Anopheles darlingi	-9.426522	-64.695708	329580	8972372.4	Third_quote	1
Apr	2014	VILA JIRAU	Anopheles darlingi	-9.426522	-64.695708	329580	8972372.4	Third_quote	1
Apr	2014	VILA JIRAU	Anopheles darlingi	-9.426522	-64.695708	329580	8972372.4	Third_quote	1
Apr	2014	VILA JIRAU	Anopheles darlingi	-9.426522	-64.695708	329580	8972372.4	Third_quote	1
Apr	2014	VILA JIRAU	Anopheles darlingi	-9.426522	-64.695708	329580	8972372.4	Third_quote	1
Apr	2014	VILA JIRAU	Anopheles darlingi	-9.426522	-64.695708	329580	8972372.4	Third_quote	1
Apr	2014	VILA JIRAU	Anopheles darlingi	-9.426522	-64.695708	329580	8972372.4	Third_quote	1
Apr	2014	VILA JIRAU	Anopheles darlingi	-9.426522	-64.695708	329580	8972372.4	Third_quote	1
Apr	2014	VILA JIRAU	Anopheles darlingi	-9.426522	-64.695708	329580	8972372.4	Third_quote	1
Apr	2014	VILA JIRAU	Anopheles darlingi	-9.426522	-64.695708	329580	8972372.4	Third_quote	1
Apr	2014	VILA JIRAU	Anopheles darlingi	-9.426522	-64.695708	329580	8972372.4	Third_quote	1
Apr	2014	VILA JIRAU	Anopheles darlingi	-9.426522	-64.695708	329580	8972372.4	Third_quote	1
Apr	2014	VILA JIRAU	Anopheles darlingi	-9.426522	-64.695708	329580	8972372.4	Third_quote	1
Apr	2014	VILA JIRAU	Anopheles darlingi	-9.426522	-64.695708	329580	8972372.4	Third_quote	1
Apr	2014	VILA JIRAU	Anopheles darlingi	-9.426522	-64.695708	329580	8972372.4	Third_quote	1
Apr	2014	VILA JIRAU	Anopheles darlingi	-9.426522	-64.695708	329580	8972372.4	Third_quote	1
Apr	2014	VILA JIRAU	Anopheles darlingi	-9.426522	-64.695708	329580	8972372.4	Third_quote	1
Apr	2014	VILA JIRAU	Anopheles darlingi	-9.426522	-64.695708	329580	8972372.4	Third_quote	1
Apr	2014	VILA JIRAU	Anopheles darlingi	-9.426522	-64.695708	329580	8972372.4	Third_quote	1
Apr	2014	VILA JIRAU	Anopheles darlingi	-9.426522	-64.695708	329580	8972372.4	Third_quote	1
Apr	2014	VILA JIRAU	Anopheles darlingi	-9.426522	-64.695708	329580	8972372.4	Third_quote	1
Apr	2014	VILA JIRAU	Anopheles darlingi	-9.426522	-64.695708	329580	8972372.4	Third_quote	1
Apr	2014	VILA JIRAU	Anopheles darlingi	-9.426522	-64.695708	329580	8972372.4	Third_quote	1
Apr	2014	VILA JIRAU	Anopheles darlingi	-9.426522	-64.695708	329580	8972372.4	Third_quote	1
Apr	2014	VILA JIRAU	Anopheles darlingi	-9.426522	-64.695708	329580	8972372.4	Third_quote	1
Apr	2014	VILA JIRAU	Anopheles darlingi	-9.426522	-64.695708	329580	8972372.4	Third_quote	1
Apr	2014	VILA JIRAU	Anopheles darlingi	-9.426522	-64.695708	329580	8972372.4	Third_quote	1
Apr	2014	VILA JIRAU	Anopheles darlingi	-9.426522	-64.695708	329580	8972372.4	Third_quote	1
Apr	2014	VILA JIRAU	Anopheles darlingi	-9.426522	-64.695708	329580	8972372.4	Third_quote	1
Apr	2014	VILA JIRAU	Anopheles darlingi	-9.426522	-64.695708	329580	8972372.4	Third_quote	1
Apr	2014	VILA JIRAU	Anopheles darlingi	-9.426522	-64.695708	329580	8972372.4	Third_quote	1
Apr	2014	VILA JIRAU	Anopheles darlingi	-9.426522	-64.695708	329580	8972372.4	Third_quote	1
Apr	2014	VILA JIRAU	Anopheles darlingi	-9.426522	-64.695708	329580	8972372.4	Third_quote	1
Apr	2014	VILA JIRAU	Anopheles darlingi	-9.426522	-64.695708	329580	8972372.4	Third_quote	1
Apr	2014	VILA JIRAU	Anopheles darlingi	-9.426522	-64.695708	329580	8972372.4	Third_quote	1
Apr	2014	VILA JIRAU	Anopheles darlingi	-9.426522	-64.695708	329580	8972372.4	Third_quote	1
Apr	2014	VILA JIRAU	Anopheles darlingi	-9.426522	-64.695708	329580	8972372.4	Third_quote	1
Apr	2014	VILA JIRAU	Anopheles darlingi	-9.426522	-64.695708	329580	8972372.4	Third_quote	1
Apr	2014	VILA JIRAU	Anopheles darlingi	-9.426522	-64.695708	329580	8972372.4	Third_quote	1
Apr	2014	VILA JIRAU	Anopheles darlingi	-9.426522	-64.695708	329580	8972372.4	Third_quote	1
Apr	2014	VILA JIRAU	Anopheles darlingi	-9.426522	-64.695708	329580	8972372.4	Third_quote	1
Apr	2014	VILA JIRAU	Anopheles darlingi	-9.426522	-64.695708	329580	8972372.4	Third_quote	1
Apr	2014	VILA JIRAU	Anopheles darlingi	-9.426522	-64.695708	329580	8972372.4	Third_quote	1
Apr	2014	VILA JIRAU	Anopheles darlingi	-9.426522	-64.695708	329580	8972372.4	Third_quote	1
Apr	2014	VILA JIRAU	Anopheles darlingi	-9.426522	-64.695708	329580	8972372.4	Third_quote	1
Apr	2014	VILA JIRAU	Anopheles darlingi	-9.426522	-64.695708	329580	8972372.4	Third_quote	1
Apr	2014	VILA JIRAU	Anopheles darlingi	-9.426522	-64.695708	329580	8972372.4	Third_quote	1
Apr	2014	VILA JIRAU	Anopheles darlingi	-9.426522	-64.695708	329580	8972372.4	Third_quote	1
Apr	2014	VILA JIRAU	Anopheles darlingi	-9.426522	-64.695708	329580	8972372.4	Third_quote	1
Apr	2014	VILA JIRAU	Anopheles darlingi	-9.426522	-64.695708	329580	8972372.4	Third_quote	1
Apr	2014	VILA JIRAU	Anopheles darlingi	-9.426522	-64.695708	329580	8972372.4	Third_quote	1
Apr	2014	VILA JIRAU	Anopheles darlingi	-9.426522	-64.695708	329580	8972372.4	Third_quote	1
Apr	2014	VILA JIRAU	Anopheles darlingi	-9.426522	-64.695708	329580	8972372.4	Third_quote	1
Apr	2014	VILA JIRAU	Anopheles darlingi	-9.426522	-64.695708	329580	8972372.4	Third_quote	1
Apr	2014	VILA JIRAU	Anopheles darlingi	-9.426522	-64.695708	329580	8972372.4	Third_quote	1
Apr	2014	VILA JIRAU	Anopheles darlingi	-9.426522	-64.695708	329580	8972372.4	Third_quote	1
Apr	2014	VILA JIRAU	Anopheles darlingi	-9.426522	-64.695708	329580	8972372.4	Third_quote	1
Apr	2014	VILA JIRAU	Anopheles darlingi	-9.426522	-64.695708	329580	8972372.4	Third_quote	1
Apr	2014	VILA JIRAU	Anopheles darlingi	-9.426522	-64.695708	329580	8972372.4	Third_quote	1
Apr	2014	VILA JIRAU	Anopheles darlingi	-9.426522	-64.695708	329580	8972372.4	Third_quote	1
Apr	2014	VILA JIRAU	Anopheles darlingi	-9.426522	-64.695708	329580	8972372.4	Third_quote	1
Apr	2014	VILA JIRAU	Anopheles darlingi	-9.426522	-64.695708	329580	8972372.4	Third_quote	1
Apr	2014	VILA JIRAU	Anopheles darlingi	-9.426522	-64.695708	329580	8972372.4	Third_quote	1
Apr	2014	VILA JIRAU	Anopheles darlingi	-9.426522	-64.695708	329580	8972372.4	Third_quote	1
Apr	2014	VILA JIRAU	Anopheles darlingi	-9.426522	-64.695708	329580	8972372.4	Third_quote	1
Apr	2014	VILA JIRAU	Anopheles darlingi	-9.426522	-64.695708	329580	8972372.4	Third_quote	1
Apr	2014	VILA JIRAU	Anopheles darlingi	-9.426522	-64.695708	329580	8972372.4	Third_quote	1
Apr	2014	VILA JIRAU	Anopheles darlingi	-9.426522	-64.695708	329580	8972372.4	Third_quote	1
Apr	2014	VILA JIRAU	Anopheles darlingi	-9.426522	-64.695708	329580	8972372.4	Third_quote	1
Apr	2014	VILA JIRAU	Anopheles darlingi	-9.426522	-64.695708	329580	8972372.4	Third_quote	1
Apr	2014	VILA JIRAU	Anopheles darlingi	-9.426522	-64.695708	329580	8972372.4	Third_quote	1
Apr	2014	VILA JIRAU	Anopheles darlingi	-9.426522	-64.695708	329580	8972372.4	Third_quote	1
Apr	2014	VILA JIRAU	Anopheles darlingi	-9.426522	-64.695708	329580	8972372.4	Third_quote	1
Apr	2014	VILA JIRAU	Anopheles darlingi	-9.426522	-64.695708	329580	8972372.4	Third_quote	1
Apr	2014	VILA JIRAU	Anopheles darlingi	-9.426522	-64.695708	329580	8972372.4	Third_quote	1
Apr	2014	VILA JIRAU	Anopheles darlingi	-9.426522	-64.695708	329580	8972372.4	Third_quote	1
Apr	2014	VILA JIRAU	Anopheles darlingi	-9.426522	-64.695708	329580	8972372.4	Third_quote	1
Apr	2014	VILA JIRAU	Anopheles darlingi	-9.426522	-64.695708	329580	8972372.4	Third_quote	1
Apr	2014	VILA JIRAU	Anopheles darlingi	-9.426522	-64.695708	329580	8972372.4	Third_quote	1
Apr	2014	VILA JIRAU	Anopheles darlingi	-9.426522	-64.695708	329580	8972372.4	Third_quote	1
Apr	2014	VILA JIRAU	Anopheles darlingi	-9.426522	-64.695708	329580	8972372.4	Third_quote	1
Apr	2014	VILA JIRAU	Anopheles darlingi	-9.426522	-64.695708	329580	8972372.4	Third_quote	1
Apr	2014	VILA JIRAU	Anopheles darlingi	-9.426522	-64.695708	329580	8972372.4	Third_quote	1
Apr	2014	VILA JIRAU	Anopheles darlingi	-9.426522	-64.695708	329580	8972372.4	Third_quote	1
Apr	2014	VILA JIRAU	Anopheles darlingi	-9.426522	-64.695708	329580	8972372.4	Third_quote	1
Apr	2014	VILA ABUNA	Anopheles darlingi	-9.676714	-65.401688	329580	8972372.4	Third_quote	1
Apr	2014	VILA JIRAU	Anopheles darlingi	-9.426522	-64.695708	329580	8972372.4	Third_quote	1
Apr	2014	VILA JIRAU	Anopheles darlingi	-9.426522	-64.695708	329580	8972372.4	Third_quote	1
Apr	2014	VILA JIRAU	Anopheles darlingi	-9.426522	-64.695708	329580	8972372.4	Third_quote	1
Apr	2014	VILA JIRAU	Anopheles darlingi	-9.426522	-64.695708	329580	8972372.4	Third_quote	1
Apr	2014	VILA JIRAU	Anopheles darlingi	-9.426522	-64.695708	329580	8972372.4	Third_quote	1
Apr	2014	VILA JIRAU	Anopheles darlingi	-9.426522	-64.695708	329580	8972372.4	Third_quote	1
Apr	2014	VILA JIRAU	Anopheles darlingi	-9.426522	-64.695708	329580	8972372.4	Third_quote	1
Apr	2014	VILA JIRAU	Anopheles darlingi	-9.426522	-64.695708	329580	8972372.4	Third_quote	1
Apr	2014	VILA JIRAU	Anopheles darlingi	-9.426522	-64.695708	329580	8972372.4	Third_quote	1
Apr	2014	VILA JIRAU	Anopheles darlingi	-9.426522	-64.695708	329580	8972372.4	Third_quote	1
Apr	2014	VILA JIRAU	Anopheles darlingi	-9.426522	-64.695708	329580	8972372.4	Third_quote	1
Apr	2014	VILA JIRAU	Anopheles darlingi	-9.426522	-64.695708	329580	8972372.4	Third_quote	1
Apr	2014	VILA JIRAU	Anopheles darlingi	-9.426522	-64.695708	329580	8972372.4	Third_quote	1
Apr	2014	VILA JIRAU	Anopheles darlingi	-9.426522	-64.695708	329580	8972372.4	Third_quote	1
Apr	2014	VILA JIRAU	Anopheles darlingi	-9.426522	-64.695708	329580	8972372.4	Third_quote	1
Apr	2014	VILA JIRAU	Anopheles darlingi	-9.426522	-64.695708	329580	8972372.4	Third_quote	1
Apr	2014	VILA JIRAU	Anopheles darlingi	-9.426522	-64.695708	329580	8972372.4	Third_quote	1
Apr	2014	VILA JIRAU	Anopheles darlingi	-9.426522	-64.695708	329580	8972372.4	Third_quote	1
Apr	2014	VILA JIRAU	Anopheles darlingi	-9.426522	-64.695708	329580	8972372.4	Third_quote	1
Apr	2014	VILA JIRAU	Anopheles darlingi	-9.426522	-64.695708	329580	8972372.4	Third_quote	1
Apr	2014	VILA JIRAU	Anopheles darlingi	-9.426522	-64.695708	329580	8972372.4	Third_quote	1
Apr	2014	VILA JIRAU	Anopheles darlingi	-9.426522	-64.695708	329580	8972372.4	Third_quote	1
Apr	2014	VILA JIRAU	Anopheles darlingi	-9.426522	-64.695708	329580	8972372.4	Third_quote	1
Apr	2014	VILA JIRAU	Anopheles darlingi	-9.426522	-64.695708	329580	8972372.4	Third_quote	1
Apr	2014	VILA JIRAU	Anopheles darlingi	-9.426522	-64.695708	329580	8972372.4	Third_quote	1
Apr	2014	VILA ABUNA	Anopheles darlingi	-9.676714	-65.401688	329580	8972372.4	Third_quote	1
Apr	2014	VILA ABUNA	Anopheles darlingi	-9.676714	-65.401688	329580	8972372.4	Third_quote	1
Apr	2014	VILA ABUNA	Anopheles sp.	-9.676714	-65.401688	329580	8972372.4	Third_quote	1
Apr	2014	VILA ABUNA	Anopheles darlingi	-9.676714	-65.401688	329580	8972372.4	Third_quote	1
Apr	2014	VILA ABUNA	Anopheles darlingi	-9.676714	-65.401688	329580	8972372.4	Third_quote	1
Apr	2014	VILA ABUNA	Anopheles darlingi	-9.676714	-65.401688	329580	8972372.4	Third_quote	1
Apr	2014	VILA ABUNA	Anopheles darlingi	-9.676714	-65.401688	329580	8972372.4	Third_quote	1
Apr	2014	VILA ABUNA	Anopheles sp.	-9.676714	-65.401688	329580	8972372.4	Third_quote	1
Apr	2014	VILA ABUNA	Anopheles darlingi	-9.676714	-65.401688	329580	8972372.4	Third_quote	1
Apr	2014	VILA ABUNA	Anopheles darlingi	-9.676714	-65.401688	329580	8972372.4	Third_quote	1
Apr	2014	VILA ABUNA	Anopheles darlingi	-9.676714	-65.401688	329580	8972372.4	Third_quote	1
Apr	2014	VILA ABUNA	Anopheles darlingi	-9.676714	-65.401688	329580	8972372.4	Third_quote	1
Apr	2014	VILA ABUNA	Anopheles darlingi	-9.676714	-65.401688	329580	8972372.4	Third_quote	1
Apr	2014	VILA ABUNA	Anopheles darlingi	-9.676714	-65.401688	329580	8972372.4	Third_quote	1
Apr	2014	VILA ABUNA	Anopheles darlingi	-9.676714	-65.401688	329580	8972372.4	Third_quote	1
Apr	2014	VILA ABUNA	Anopheles darlingi	-9.676714	-65.401688	329580	8972372.4	Third_quote	1
Apr	2015	BALSA ABUNA	Anopheles darlingi	-9.666732	-65.435894	232692.9	8930479.9	Third_quote	1
Apr	2015	BALSA ABUNA	Anopheles darlingi	-9.666732	-65.435894	232692.9	8930479.9	Third_quote	1
Apr	2015	BALSA ABUNA	Anopheles darlingi	-9.666732	-65.435894	232692.9	8930479.9	Third_quote	1
Apr	2015	BALSA ABUNA	Anopheles darlingi	-9.666732	-65.435894	232692.9	8930479.9	Third_quote	1
Apr	2015	BALSA ABUNA	Anopheles darlingi	-9.666732	-65.435894	232692.9	8930479.9	Third_quote	1
Apr	2015	BALSA ABUNA	Anopheles darlingi	-9.666732	-65.435894	232692.9	8930479.9	Third_quote	1
Apr	2015	BALSA ABUNA	Anopheles darlingi	-9.666732	-65.435894	232692.9	8930479.9	Third_quote	1
Apr	2015	BALSA ABUNA	Anopheles darlingi	-9.666732	-65.435894	232692.9	8930479.9	Third_quote	1
Apr	2015	BALSA ABUNA	Anopheles darlingi	-9.666732	-65.435894	232692.9	8930479.9	Third_quote	1
Apr	2015	BALSA ABUNA	Anopheles darlingi	-9.666732	-65.435894	232692.9	8930479.9	Third_quote	1
Apr	2015	BALSA ABUNA	Anopheles darlingi	-9.666732	-65.435894	232692.9	8930479.9	Third_quote	1
Apr	2015	BALSA ABUNA	Anopheles darlingi	-9.666732	-65.435894	232692.9	8930479.9	Third_quote	1
Apr	2015	BALSA ABUNA	Anopheles darlingi	-9.666732	-65.435894	232692.9	8930479.9	Third_quote	1
Apr	2015	BALSA ABUNA	Anopheles darlingi	-9.666732	-65.435894	232692.9	8930479.9	Third_quote	1
Apr	2015	BALSA ABUNA	Anopheles darlingi	-9.666732	-65.435894	232692.9	8930479.9	Third_quote	1
Apr	2015	BALSA ABUNA	Anopheles darlingi	-9.666732	-65.435894	232692.9	8930479.9	Third_quote	1
Apr	2015	BALSA ABUNA	Anopheles darlingi	-9.666732	-65.435894	232692.9	8930479.9	Third_quote	1
Apr	2015	BALSA ABUNA	Anopheles darlingi	-9.666732	-65.435894	232692.9	8930479.9	Third_quote	1
Apr	2015	BALSA ABUNA	Anopheles darlingi	-9.666732	-65.435894	232692.9	8930479.9	Third_quote	1
Apr	2015	BALSA ABUNA	Anopheles darlingi	-9.666732	-65.435894	232692.9	8930479.9	Third_quote	1
Apr	2015	BALSA ABUNA	Anopheles darlingi	-9.666732	-65.435894	232692.9	8930479.9	Third_quote	1
Apr	2015	BALSA ABUNA	Anopheles darlingi	-9.666732	-65.435894	232692.9	8930479.9	Third_quote	1
Apr	2015	BALSA ABUNA	Anopheles darlingi	-9.666732	-65.435894	232692.9	8930479.9	Third_quote	1
Apr	2015	BALSA ABUNA	Anopheles darlingi	-9.666732	-65.435894	232692.9	8930479.9	Third_quote	1
Apr	2015	BALSA ABUNA	Anopheles darlingi	-9.666732	-65.435894	232692.9	8930479.9	Third_quote	1
Apr	2015	BALSA ABUNA	Anopheles darlingi	-9.666732	-65.435894	232692.9	8930479.9	Third_quote	1
Apr	2015	BALSA ABUNA	Anopheles darlingi	-9.666732	-65.435894	232692.9	8930479.9	Third_quote	1
Apr	2015	BALSA ABUNA	Anopheles darlingi	-9.666732	-65.435894	232692.9	8930479.9	Third_quote	1
Apr	2015	BALSA ABUNA	Anopheles darlingi	-9.666732	-65.435894	232692.9	8930479.9	Third_quote	1
Apr	2015	BALSA ABUNA	Anopheles darlingi	-9.666732	-65.435894	232692.9	8930479.9	Third_quote	1
Apr	2015	BALSA ABUNA	Anopheles darlingi	-9.666732	-65.435894	232692.9	8930479.9	Third_quote	1
Apr	2015	BALSA ABUNA	Anopheles darlingi	-9.666732	-65.435894	232692.9	8930479.9	Third_quote	1
Apr	2015	BALSA ABUNA	Anopheles darlingi	-9.666732	-65.435894	232692.9	8930479.9	Third_quote	1
Apr	2015	BALSA ABUNA	Anopheles darlingi	-9.666732	-65.435894	232692.9	8930479.9	Third_quote	1
Apr	2015	BALSA ABUNA	Anopheles darlingi	-9.666732	-65.435894	232692.9	8930479.9	Third_quote	1
Apr	2015	BALSA ABUNA	Anopheles darlingi	-9.666732	-65.435894	232692.9	8930479.9	Third_quote	1
Apr	2015	BALSA ABUNA	Anopheles darlingi	-9.666732	-65.435894	232692.9	8930479.9	Third_quote	1
Apr	2015	BALSA ABUNA	Anopheles darlingi	-9.666732	-65.435894	232692.9	8930479.9	Third_quote	1
Apr	2015	BALSA ABUNA	Anopheles darlingi	-9.666732	-65.435894	232692.9	8930479.9	Third_quote	1
Apr	2015	BALSA ABUNA	Anopheles darlingi	-9.666732	-65.435894	232692.9	8930479.9	Third_quote	1
Apr	2015	BALSA ABUNA	Anopheles darlingi	-9.666732	-65.435894	232692.9	8930479.9	Third_quote	1
Apr	2015	BALSA ABUNA	Anopheles darlingi	-9.666732	-65.435894	232692.9	8930479.9	Third_quote	1
Apr	2015	BALSA ABUNA	Anopheles darlingi	-9.666732	-65.435894	232692.9	8930479.9	Third_quote	1
Apr	2015	BALSA ABUNA	Anopheles darlingi	-9.666732	-65.435894	232692.9	8930479.9	Third_quote	1
Apr	2015	BALSA ABUNA	Anopheles darlingi	-9.666732	-65.435894	232692.9	8930479.9	Third_quote	1
Apr	2015	BALSA ABUNA	Anopheles darlingi	-9.666732	-65.435894	232692.9	8930479.9	Third_quote	1
Apr	2015	BALSA ABUNA	Anopheles darlingi	-9.666732	-65.435894	232692.9	8930479.9	Third_quote	1
Apr	2015	BALSA ABUNA	Anopheles darlingi	-9.666732	-65.435894	232692.9	8930479.9	Third_quote	1
Apr	2015	BALSA ABUNA	Anopheles darlingi	-9.666732	-65.435894	232692.9	8930479.9	Third_quote	1
Apr	2015	BALSA ABUNA	Anopheles darlingi	-9.666732	-65.435894	232692.9	8930479.9	Third_quote	1
Apr	2015	BALSA ABUNA	Anopheles darlingi	-9.666732	-65.435894	232692.9	8930479.9	Third_quote	1
Apr	2015	BALSA ABUNA	Anopheles darlingi	-9.666732	-65.435894	232692.9	8930479.9	Third_quote	1
Apr	2015	BALSA ABUNA	Anopheles darlingi	-9.666732	-65.435894	232692.9	8930479.9	Third_quote	1
Apr	2015	BALSA ABUNA	Anopheles darlingi	-9.666732	-65.435894	232692.9	8930479.9	Third_quote	1
Apr	2015	BALSA ABUNA	Anopheles darlingi	-9.666732	-65.435894	232692.9	8930479.9	Third_quote	1
Apr	2015	BALSA ABUNA	Anopheles darlingi	-9.666732	-65.435894	232692.9	8930479.9	Third_quote	1
Apr	2015	BALSA ABUNA	Anopheles darlingi	-9.666732	-65.435894	232692.9	8930479.9	Third_quote	1
Apr	2015	BALSA ABUNA	Anopheles darlingi	-9.666732	-65.435894	232692.9	8930479.9	Third_quote	1
Apr	2015	BALSA ABUNA	Anopheles darlingi	-9.666732	-65.435894	232692.9	8930479.9	Third_quote	1
Apr	2015	BALSA ABUNA	Anopheles darlingi	-9.666732	-65.435894	232692.9	8930479.9	Third_quote	1
Apr	2015	BALSA ABUNA	Anopheles darlingi	-9.666732	-65.435894	232692.9	8930479.9	Third_quote	1
Apr	2015	BALSA ABUNA	Anopheles darlingi	-9.666732	-65.435894	232692.9	8930479.9	Third_quote	1
Apr	2015	BALSA ABUNA	Anopheles darlingi	-9.666732	-65.435894	232692.9	8930479.9	Third_quote	1
Apr	2015	BALSA ABUNA	Anopheles darlingi	-9.666732	-65.435894	232692.9	8930479.9	Third_quote	1
Apr	2015	BALSA ABUNA	Anopheles darlingi	-9.666732	-65.435894	232692.9	8930479.9	Third_quote	1
Apr	2015	BALSA ABUNA	Anopheles darlingi	-9.666732	-65.435894	232692.9	8930479.9	Third_quote	1
Apr	2015	BALSA ABUNA	Anopheles darlingi	-9.666732	-65.435894	232692.9	8930479.9	Third_quote	1
Apr	2015	BALSA ABUNA	Anopheles darlingi	-9.666732	-65.435894	232692.9	8930479.9	Third_quote	1
Apr	2015	BALSA ABUNA	Anopheles darlingi	-9.666732	-65.435894	232692.9	8930479.9	Third_quote	1
Apr	2015	BALSA ABUNA	Anopheles darlingi	-9.666732	-65.435894	232692.9	8930479.9	Third_quote	1
Apr	2015	BALSA ABUNA	Anopheles darlingi	-9.666732	-65.435894	232692.9	8930479.9	Third_quote	1
Apr	2015	BALSA ABUNA	Anopheles darlingi	-9.666732	-65.435894	232692.9	8930479.9	Third_quote	1
Apr	2015	BALSA ABUNA	Anopheles darlingi	-9.666732	-65.435894	232692.9	8930479.9	Third_quote	1
Apr	2015	BALSA ABUNA	Anopheles darlingi	-9.666732	-65.435894	232692.9	8930479.9	Third_quote	1
Apr	2015	BALSA ABUNA	Anopheles darlingi	-9.666732	-65.435894	232692.9	8930479.9	Third_quote	1
Apr	2015	BALSA ABUNA	Anopheles darlingi	-9.666732	-65.435894	232692.9	8930479.9	Third_quote	1
Apr	2015	BALSA ABUNA	Anopheles darlingi	-9.666732	-65.435894	232692.9	8930479.9	Third_quote	1
Apr	2015	BALSA ABUNA	Anopheles darlingi	-9.666732	-65.435894	232692.9	8930479.9	Third_quote	1
Apr	2015	BALSA ABUNA	Anopheles darlingi	-9.666732	-65.435894	232692.9	8930479.9	Third_quote	1
Apr	2015	BALSA ABUNA	Anopheles darlingi	-9.666732	-65.435894	232692.9	8930479.9	Third_quote	1
Apr	2015	BALSA ABUNA	Anopheles darlingi	-9.666732	-65.435894	232692.9	8930479.9	Third_quote	1
Apr	2015	BALSA ABUNA	Anopheles darlingi	-9.666732	-65.435894	232692.9	8930479.9	Third_quote	1
Apr	2015	BALSA ABUNA	Anopheles darlingi	-9.666732	-65.435894	232692.9	8930479.9	Third_quote	1
Apr	2015	BALSA ABUNA	Anopheles darlingi	-9.666732	-65.435894	232692.9	8930479.9	Third_quote	1
Apr	2015	BALSA ABUNA	Anopheles darlingi	-9.666732	-65.435894	232692.9	8930479.9	Third_quote	1
Apr	2015	BALSA ABUNA	Anopheles darlingi	-9.666732	-65.435894	232692.9	8930479.9	Third_quote	1
Apr	2015	BALSA ABUNA	Anopheles darlingi	-9.666732	-65.435894	232692.9	8930479.9	Third_quote	1
Apr	2015	BALSA ABUNA	Anopheles darlingi	-9.666732	-65.435894	232692.9	8930479.9	Third_quote	1
Apr	2015	BALSA ABUNA	Anopheles darlingi	-9.666732	-65.435894	232692.9	8930479.9	Third_quote	1
Apr	2015	BALSA ABUNA	Anopheles darlingi	-9.666732	-65.435894	232692.9	8930479.9	Third_quote	1
Apr	2015	BALSA ABUNA	Anopheles darlingi	-9.666732	-65.435894	232692.9	8930479.9	Third_quote	1
Apr	2015	BALSA ABUNA	Anopheles darlingi	-9.666732	-65.435894	232692.9	8930479.9	Third_quote	1
Apr	2015	BALSA ABUNA	Anopheles darlingi	-9.666732	-65.435894	232692.9	8930479.9	Third_quote	1
Apr	2015	BALSA ABUNA	Anopheles darlingi	-9.666732	-65.435894	232692.9	8930479.9	Third_quote	1
Apr	2015	BALSA ABUNA	Anopheles darlingi	-9.666732	-65.435894	232692.9	8930479.9	Third_quote	1
Apr	2015	BALSA ABUNA	Anopheles darlingi	-9.666732	-65.435894	232692.9	8930479.9	Third_quote	1
Apr	2015	BALSA ABUNA	Anopheles darlingi	-9.666732	-65.435894	232692.9	8930479.9	Third_quote	1
Apr	2015	POLIGONAL MARGEM ESQUERDA	Anopheles triannulatus	-9.229662	-64.65125	318596.5	8979337.5	Third_quote	1
Apr	2015	POLIGONAL MARGEM ESQUERDA	Anopheles triannulatus	-9.229662	-64.65125	318596.5	8979337.5	Third_quote	1
Apr	2015	POLIGONAL MARGEM ESQUERDA	Anopheles triannulatus	-9.229662	-64.65125	318596.5	8979337.5	Third_quote	1
Apr	2015	JACI PARANA	Anopheles konderi	-9.259651	-64.395767	346682.2	8976140.8	Third_quote	1
Apr	2015	JACI PARANA	Anopheles darlingi	-9.259651	-64.395767	346682.2	8976140.8	Third_quote	1
Apr	2015	JACI PARANA	Anopheles triannulatus	-9.259651	-64.395767	346682.2	8976140.8	Third_quote	1
Apr	2015	JACI PARANA	Anopheles triannulatus	-9.259651	-64.395767	346682.2	8976140.8	Third_quote	1
Apr	2015	JACI PARANA	Anopheles triannulatus	-9.259651	-64.395767	346682.2	8976140.8	Third_quote	1
Apr	2015	VILA JIRAU	Anopheles darlingi	-9.426522	-64.695708	313815.5	8957540.8	Third_quote	1
Apr	2015	VILA JIRAU	Anopheles darlingi	-9.426522	-64.695708	313815.5	8957540.8	Third_quote	1
Apr	2015	VILA JIRAU	Anopheles darlingi	-9.426522	-64.695708	313815.5	8957540.8	Third_quote	1
Apr	2015	VILA JIRAU	Anopheles darlingi	-9.426522	-64.695708	313815.5	8957540.8	Third_quote	1
Apr	2015	VILA JIRAU	Anopheles darlingi	-9.426522	-64.695708	313815.5	8957540.8	Third_quote	1
Apr	2015	VILA JIRAU	Anopheles darlingi	-9.426522	-64.695708	313815.5	8957540.8	Third_quote	1
Apr	2015	VILA JIRAU	Anopheles darlingi	-9.426522	-64.695708	313815.5	8957540.8	Third_quote	1
Apr	2015	VILA JIRAU	Anopheles darlingi	-9.426522	-64.695708	313815.5	8957540.8	Third_quote	1
Apr	2015	VILA JIRAU	Anopheles darlingi	-9.426522	-64.695708	313815.5	8957540.8	Third_quote	1
Apr	2015	VILA ABUNA	Anopheles darlingi	-9.676714	-65.401688	239952.3	8958283.7	Third_quote	1
Apr	2015	VILA ABUNA	Anopheles darlingi	-9.676714	-65.401688	239952.3	8958283.7	Third_quote	1
Apr	2015	VILA ABUNA	Anopheles darlingi	-9.676714	-65.401688	239952.3	8958283.7	Third_quote	1
Apr	2015	VILA ABUNA	Anopheles darlingi	-9.676714	-65.401688	239952.3	8958283.7	Third_quote	1
Apr	2015	VILA ABUNA	Anopheles darlingi	-9.676714	-65.401688	239952.3	8958283.7	Third_quote	1
Apr	2015	VILA ABUNA	Anopheles darlingi	-9.676714	-65.401688	239952.3	8958283.7	Third_quote	1
Apr	2015	VILA ABUNA	Anopheles darlingi	-9.676714	-65.401688	239952.3	8958283.7	Third_quote	1
Apr	2015	VILA ABUNA	Anopheles darlingi	-9.676714	-65.401688	239952.3	8958283.7	Third_quote	1
Apr	2015	VILA ABUNA	Anopheles darlingi	-9.676714	-65.401688	239952.3	8958283.7	Third_quote	1
Apr	2015	VILA ABUNA	Anopheles darlingi	-9.676714	-65.401688	239952.3	8958283.7	Third_quote	1
Apr	2015	BALSA ABUNA	Anopheles konderi	-9.666732	-65.435894	232692.9	8930479.9	Third_quote	1
Apr	2015	BALSA ABUNA	Anopheles konderi	-9.666732	-65.435894	232692.9	8930479.9	Third_quote	1
Apr	2015	BALSA ABUNA	Anopheles konderi	-9.666732	-65.435894	232692.9	8930479.9	Third_quote	1
Apr	2015	BALSA ABUNA	Anopheles darlingi	-9.666732	-65.435894	232692.9	8930479.9	Third_quote	1
Apr	2015	BALSA ABUNA	Anopheles darlingi	-9.666732	-65.435894	232692.9	8930479.9	Third_quote	1
Apr	2015	BALSA ABUNA	Anopheles darlingi	-9.666732	-65.435894	232692.9	8930479.9	Third_quote	1
Apr	2015	BALSA ABUNA	Anopheles darlingi	-9.666732	-65.435894	232692.9	8930479.9	Third_quote	1
Apr	2015	BALSA ABUNA	Anopheles darlingi	-9.666732	-65.435894	232692.9	8930479.9	Third_quote	1
Apr	2015	BALSA ABUNA	Anopheles darlingi	-9.666732	-65.435894	232692.9	8930479.9	Third_quote	1
Apr	2015	BALSA ABUNA	Anopheles darlingi	-9.666732	-65.435894	232692.9	8930479.9	Third_quote	1
Apr	2015	BALSA ABUNA	Anopheles darlingi	-9.666732	-65.435894	232692.9	8930479.9	Third_quote	1
Apr	2015	BALSA ABUNA	Anopheles darlingi	-9.666732	-65.435894	232692.9	8930479.9	Third_quote	1
Apr	2015	BALSA ABUNA	Anopheles darlingi	-9.666732	-65.435894	232692.9	8930479.9	Third_quote	1
Apr	2015	BALSA ABUNA	Anopheles darlingi	-9.666732	-65.435894	232692.9	8930479.9	Third_quote	1
Apr	2015	BALSA ABUNA	Anopheles darlingi	-9.666732	-65.435894	232692.9	8930479.9	Third_quote	1
Apr	2015	BALSA ABUNA	Anopheles darlingi	-9.666732	-65.435894	232692.9	8930479.9	Third_quote	1
Apr	2015	BALSA ABUNA	Anopheles darlingi	-9.666732	-65.435894	232692.9	8930479.9	Third_quote	1
Apr	2015	BALSA ABUNA	Anopheles darlingi	-9.666732	-65.435894	232692.9	8930479.9	Third_quote	1
Apr	2015	BALSA ABUNA	Anopheles darlingi	-9.666732	-65.435894	232692.9	8930479.9	Third_quote	1
Apr	2015	BALSA ABUNA	Anopheles darlingi	-9.666732	-65.435894	232692.9	8930479.9	Third_quote	1
Apr	2015	BALSA ABUNA	Anopheles darlingi	-9.666732	-65.435894	232692.9	8930479.9	Third_quote	1
Apr	2015	BALSA ABUNA	Anopheles darlingi	-9.666732	-65.435894	232692.9	8930479.9	Third_quote	1
Apr	2015	BALSA ABUNA	Anopheles darlingi	-9.666732	-65.435894	232692.9	8930479.9	Third_quote	1
Apr	2015	BALSA ABUNA	Anopheles darlingi	-9.666732	-65.435894	232692.9	8930479.9	Third_quote	1
Apr	2015	BALSA ABUNA	Anopheles darlingi	-9.666732	-65.435894	232692.9	8930479.9	Third_quote	1
Apr	2015	BALSA ABUNA	Anopheles darlingi	-9.666732	-65.435894	232692.9	8930479.9	Third_quote	1
Apr	2015	BALSA ABUNA	Anopheles darlingi	-9.666732	-65.435894	232692.9	8930479.9	Third_quote	1
Apr	2015	BALSA ABUNA	Anopheles darlingi	-9.666732	-65.435894	232692.9	8930479.9	Third_quote	1
Apr	2015	BALSA ABUNA	Anopheles darlingi	-9.666732	-65.435894	232692.9	8930479.9	Third_quote	1
Apr	2015	BALSA ABUNA	Anopheles darlingi	-9.666732	-65.435894	232692.9	8930479.9	Third_quote	1
Apr	2015	BALSA ABUNA	Anopheles darlingi	-9.666732	-65.435894	232692.9	8930479.9	Third_quote	1
Apr	2015	BALSA ABUNA	Anopheles darlingi	-9.666732	-65.435894	232692.9	8930479.9	Third_quote	1
Apr	2015	BALSA ABUNA	Anopheles darlingi	-9.666732	-65.435894	232692.9	8930479.9	Third_quote	1
Apr	2015	BALSA ABUNA	Anopheles darlingi	-9.666732	-65.435894	232692.9	8930479.9	Third_quote	1
Apr	2015	BALSA ABUNA	Anopheles darlingi	-9.666732	-65.435894	232692.9	8930479.9	Third_quote	1
Apr	2015	BALSA ABUNA	Anopheles darlingi	-9.666732	-65.435894	232692.9	8930479.9	Third_quote	1
Apr	2015	BALSA ABUNA	Anopheles darlingi	-9.666732	-65.435894	232692.9	8930479.9	Third_quote	1
Apr	2015	BALSA ABUNA	Anopheles darlingi	-9.666732	-65.435894	232692.9	8930479.9	Third_quote	1
Apr	2015	BALSA ABUNA	Anopheles darlingi	-9.666732	-65.435894	232692.9	8930479.9	Third_quote	1
Apr	2015	BALSA ABUNA	Anopheles darlingi	-9.666732	-65.435894	232692.9	8930479.9	Third_quote	1
Apr	2015	BALSA ABUNA	Anopheles darlingi	-9.666732	-65.435894	232692.9	8930479.9	Third_quote	1
Apr	2015	BALSA ABUNA	Anopheles darlingi	-9.666732	-65.435894	232692.9	8930479.9	Third_quote	1
Apr	2015	BALSA ABUNA	Anopheles darlingi	-9.666732	-65.435894	232692.9	8930479.9	Third_quote	1
Apr	2015	BALSA ABUNA	Anopheles darlingi	-9.666732	-65.435894	232692.9	8930479.9	Third_quote	1
Apr	2015	BALSA ABUNA	Anopheles darlingi	-9.666732	-65.435894	232692.9	8930479.9	Third_quote	1
Apr	2015	BALSA ABUNA	Anopheles darlingi	-9.666732	-65.435894	232692.9	8930479.9	Third_quote	1
Apr	2015	BALSA ABUNA	Anopheles darlingi	-9.666732	-65.435894	232692.9	8930479.9	Third_quote	1
Apr	2015	BALSA ABUNA	Anopheles darlingi	-9.666732	-65.435894	232692.9	8930479.9	Third_quote	1
Apr	2015	BALSA ABUNA	Anopheles darlingi	-9.666732	-65.435894	232692.9	8930479.9	Third_quote	1
Apr	2015	BALSA ABUNA	Anopheles darlingi	-9.666732	-65.435894	232692.9	8930479.9	Third_quote	1
Apr	2015	BALSA ABUNA	Anopheles darlingi	-9.666732	-65.435894	232692.9	8930479.9	Third_quote	1
Apr	2015	BALSA ABUNA	Anopheles darlingi	-9.666732	-65.435894	232692.9	8930479.9	Third_quote	1
Apr	2015	BALSA ABUNA	Anopheles darlingi	-9.666732	-65.435894	232692.9	8930479.9	Third_quote	1
Apr	2015	BALSA ABUNA	Anopheles darlingi	-9.666732	-65.435894	232692.9	8930479.9	Third_quote	1
Apr	2015	BALSA ABUNA	Anopheles darlingi	-9.666732	-65.435894	232692.9	8930479.9	Third_quote	1
Apr	2015	BALSA ABUNA	Anopheles darlingi	-9.666732	-65.435894	232692.9	8930479.9	Third_quote	1
Apr	2015	BALSA ABUNA	Anopheles darlingi	-9.666732	-65.435894	232692.9	8930479.9	Third_quote	1
Apr	2015	BALSA ABUNA	Anopheles darlingi	-9.666732	-65.435894	232692.9	8930479.9	Third_quote	1
Apr	2015	BALSA ABUNA	Anopheles darlingi	-9.666732	-65.435894	232692.9	8930479.9	Third_quote	1
Apr	2015	BALSA ABUNA	Anopheles darlingi	-9.666732	-65.435894	232692.9	8930479.9	Third_quote	1
Apr	2015	BALSA ABUNA	Anopheles darlingi	-9.666732	-65.435894	232692.9	8930479.9	Third_quote	1
Apr	2015	BALSA ABUNA	Anopheles darlingi	-9.666732	-65.435894	232692.9	8930479.9	Third_quote	1
Apr	2015	BALSA ABUNA	Anopheles darlingi	-9.666732	-65.435894	232692.9	8930479.9	Third_quote	1
Apr	2015	BALSA ABUNA	Anopheles darlingi	-9.666732	-65.435894	232692.9	8930479.9	Third_quote	1
Apr	2015	BALSA ABUNA	Anopheles darlingi	-9.666732	-65.435894	232692.9	8930479.9	Third_quote	1
Apr	2015	BALSA ABUNA	Anopheles darlingi	-9.666732	-65.435894	232692.9	8930479.9	Third_quote	1
Apr	2015	BALSA ABUNA	Anopheles darlingi	-9.666732	-65.435894	232692.9	8930479.9	Third_quote	1
Apr	2015	BALSA ABUNA	Anopheles darlingi	-9.666732	-65.435894	232692.9	8930479.9	Third_quote	1
Apr	2015	BALSA ABUNA	Anopheles darlingi	-9.666732	-65.435894	232692.9	8930479.9	Third_quote	1
Apr	2015	BALSA ABUNA	Anopheles darlingi	-9.666732	-65.435894	232692.9	8930479.9	Third_quote	1
Apr	2015	BALSA ABUNA	Anopheles darlingi	-9.666732	-65.435894	232692.9	8930479.9	Third_quote	1
Apr	2015	BALSA ABUNA	Anopheles darlingi	-9.666732	-65.435894	232692.9	8930479.9	Third_quote	1
Apr	2015	BALSA ABUNA	Anopheles darlingi	-9.666732	-65.435894	232692.9	8930479.9	Third_quote	1
Apr	2015	BALSA ABUNA	Anopheles darlingi	-9.666732	-65.435894	232692.9	8930479.9	Third_quote	1
Apr	2015	BALSA ABUNA	Anopheles darlingi	-9.666732	-65.435894	232692.9	8930479.9	Third_quote	1
Apr	2015	BALSA ABUNA	Anopheles darlingi	-9.666732	-65.435894	232692.9	8930479.9	Third_quote	1
Apr	2015	BALSA ABUNA	Anopheles darlingi	-9.666732	-65.435894	232692.9	8930479.9	Third_quote	1
Apr	2015	BALSA ABUNA	Anopheles darlingi	-9.666732	-65.435894	232692.9	8930479.9	Third_quote	1
Apr	2015	BALSA ABUNA	Anopheles darlingi	-9.666732	-65.435894	232692.9	8930479.9	Third_quote	1
Apr	2015	BALSA ABUNA	Anopheles darlingi	-9.666732	-65.435894	232692.9	8930479.9	Third_quote	1
Apr	2015	BALSA ABUNA	Anopheles darlingi	-9.666732	-65.435894	232692.9	8930479.9	Third_quote	1
Apr	2015	BALSA ABUNA	Anopheles darlingi	-9.666732	-65.435894	232692.9	8930479.9	Third_quote	1
Apr	2015	BALSA ABUNA	Anopheles darlingi	-9.666732	-65.435894	232692.9	8930479.9	Third_quote	1
Apr	2015	BALSA ABUNA	Anopheles darlingi	-9.666732	-65.435894	232692.9	8930479.9	Third_quote	1
Apr	2015	BALSA ABUNA	Anopheles darlingi	-9.666732	-65.435894	232692.9	8930479.9	Third_quote	1
Apr	2015	BALSA ABUNA	Anopheles darlingi	-9.666732	-65.435894	232692.9	8930479.9	Third_quote	1
Apr	2015	BALSA ABUNA	Anopheles darlingi	-9.666732	-65.435894	232692.9	8930479.9	Third_quote	1
Apr	2015	BALSA ABUNA	Anopheles darlingi	-9.666732	-65.435894	232692.9	8930479.9	Third_quote	1
Apr	2015	BALSA ABUNA	Anopheles darlingi	-9.666732	-65.435894	232692.9	8930479.9	Third_quote	1
Apr	2015	BALSA ABUNA	Anopheles darlingi	-9.666732	-65.435894	232692.9	8930479.9	Third_quote	1
Apr	2015	BALSA ABUNA	Anopheles darlingi	-9.666732	-65.435894	232692.9	8930479.9	Third_quote	1
Apr	2015	BALSA ABUNA	Anopheles darlingi	-9.666732	-65.435894	232692.9	8930479.9	Third_quote	1
Apr	2015	BALSA ABUNA	Anopheles darlingi	-9.666732	-65.435894	232692.9	8930479.9	Third_quote	1
Apr	2015	BALSA ABUNA	Anopheles darlingi	-9.666732	-65.435894	232692.9	8930479.9	Third_quote	1
Apr	2015	BALSA ABUNA	Anopheles darlingi	-9.666732	-65.435894	232692.9	8930479.9	Third_quote	1
Apr	2015	BALSA ABUNA	Anopheles darlingi	-9.666732	-65.435894	232692.9	8930479.9	Third_quote	1
Apr	2015	BALSA ABUNA	Anopheles darlingi	-9.666732	-65.435894	232692.9	8930479.9	Third_quote	1
Apr	2015	BALSA ABUNA	Anopheles darlingi	-9.666732	-65.435894	232692.9	8930479.9	Third_quote	1
Apr	2015	BALSA ABUNA	Anopheles darlingi	-9.666732	-65.435894	232692.9	8930479.9	Third_quote	1
Apr	2015	BALSA ABUNA	Anopheles darlingi	-9.666732	-65.435894	232692.9	8930479.9	Third_quote	1
Apr	2015	BALSA ABUNA	Anopheles darlingi	-9.666732	-65.435894	232692.9	8930479.9	Third_quote	1
Apr	2015	BALSA ABUNA	Anopheles darlingi	-9.666732	-65.435894	232692.9	8930479.9	Third_quote	1
Apr	2015	BALSA ABUNA	Anopheles darlingi	-9.666732	-65.435894	232692.9	8930479.9	Third_quote	1
Apr	2015	BALSA ABUNA	Anopheles darlingi	-9.666732	-65.435894	232692.9	8930479.9	Third_quote	1
Apr	2015	BALSA ABUNA	Anopheles darlingi	-9.666732	-65.435894	232692.9	8930479.9	Third_quote	1
Apr	2015	BALSA ABUNA	Anopheles darlingi	-9.666732	-65.435894	232692.9	8930479.9	Third_quote	1
Apr	2015	BALSA ABUNA	Anopheles darlingi	-9.666732	-65.435894	232692.9	8930479.9	Third_quote	1
Apr	2015	BALSA ABUNA	Anopheles darlingi	-9.666732	-65.435894	232692.9	8930479.9	Third_quote	1
Apr	2015	BALSA ABUNA	Anopheles darlingi	-9.666732	-65.435894	232692.9	8930479.9	Third_quote	1
Apr	2015	BALSA ABUNA	Anopheles darlingi	-9.666732	-65.435894	232692.9	8930479.9	Third_quote	1
Apr	2015	BALSA ABUNA	Anopheles darlingi	-9.666732	-65.435894	232692.9	8930479.9	Third_quote	1
Apr	2015	BALSA ABUNA	Anopheles darlingi	-9.666732	-65.435894	232692.9	8930479.9	Third_quote	1
Apr	2015	BALSA ABUNA	Anopheles darlingi	-9.666732	-65.435894	232692.9	8930479.9	Third_quote	1
Apr	2015	BALSA ABUNA	Anopheles darlingi	-9.666732	-65.435894	232692.9	8930479.9	Third_quote	1
Apr	2015	BALSA ABUNA	Anopheles darlingi	-9.666732	-65.435894	232692.9	8930479.9	Third_quote	1
Apr	2015	BALSA ABUNA	Anopheles darlingi	-9.666732	-65.435894	232692.9	8930479.9	Third_quote	1
Apr	2015	BALSA ABUNA	Anopheles darlingi	-9.666732	-65.435894	232692.9	8930479.9	Third_quote	1
Apr	2015	BALSA ABUNA	Anopheles darlingi	-9.666732	-65.435894	232692.9	8930479.9	Third_quote	1
Apr	2015	BALSA ABUNA	Anopheles darlingi	-9.666732	-65.435894	232692.9	8930479.9	Third_quote	1
Apr	2015	BALSA ABUNA	Anopheles darlingi	-9.666732	-65.435894	232692.9	8930479.9	Third_quote	1
Apr	2015	BALSA ABUNA	Anopheles darlingi	-9.666732	-65.435894	232692.9	8930479.9	Third_quote	1
Apr	2015	BALSA ABUNA	Anopheles darlingi	-9.666732	-65.435894	232692.9	8930479.9	Third_quote	1
Apr	2015	BALSA ABUNA	Anopheles darlingi	-9.666732	-65.435894	232692.9	8930479.9	Third_quote	1
Apr	2015	BALSA ABUNA	Anopheles darlingi	-9.666732	-65.435894	232692.9	8930479.9	Third_quote	1
Apr	2015	BALSA ABUNA	Anopheles darlingi	-9.666732	-65.435894	232692.9	8930479.9	Third_quote	1
Apr	2015	BALSA ABUNA	Anopheles darlingi	-9.666732	-65.435894	232692.9	8930479.9	Third_quote	1
Apr	2015	BALSA ABUNA	Anopheles darlingi	-9.666732	-65.435894	232692.9	8930479.9	Third_quote	1
Apr	2015	BALSA ABUNA	Anopheles darlingi	-9.666732	-65.435894	232692.9	8930479.9	Third_quote	1
Apr	2015	BALSA ABUNA	Anopheles darlingi	-9.666732	-65.435894	232692.9	8930479.9	Third_quote	1
Apr	2015	BALSA ABUNA	Anopheles darlingi	-9.666732	-65.435894	232692.9	8930479.9	Third_quote	1
Apr	2015	BALSA ABUNA	Anopheles mattogrossensis	-9.666732	-65.435894	232692.9	8930479.9	Third_quote	1
Apr	2015	BALSA ABUNA	Anopheles deaneorum	-9.666732	-65.435894	232692.9	8930479.9	Third_quote	1
Apr	2015	BALSA ABUNA	Anopheles deaneorum	-9.666732	-65.435894	232692.9	8930479.9	Third_quote	1
Apr	2015	BALSA ABUNA	Anopheles deaneorum	-9.666732	-65.435894	232692.9	8930479.9	Third_quote	1
Apr	2015	BALSA ABUNA	Anopheles deaneorum	-9.666732	-65.435894	232692.9	8930479.9	Third_quote	1
Apr	2015	BALSA ABUNA	Anopheles deaneorum	-9.666732	-65.435894	232692.9	8930479.9	Third_quote	1
Apr	2015	BALSA ABUNA	Anopheles darlingi	-9.666732	-65.435894	232692.9	8930479.9	Third_quote	1
Apr	2015	BALSA ABUNA	Anopheles darlingi	-9.666732	-65.435894	232692.9	8930479.9	Third_quote	1
Apr	2015	BALSA ABUNA	Anopheles darlingi	-9.666732	-65.435894	232692.9	8930479.9	Third_quote	1
Apr	2015	BALSA ABUNA	Anopheles darlingi	-9.666732	-65.435894	232692.9	8930479.9	Third_quote	1
Apr	2015	BALSA ABUNA	Anopheles darlingi	-9.666732	-65.435894	232692.9	8930479.9	Third_quote	1
Apr	2015	BALSA ABUNA	Anopheles darlingi	-9.666732	-65.435894	232692.9	8930479.9	Third_quote	1
Apr	2015	BALSA ABUNA	Anopheles darlingi	-9.666732	-65.435894	232692.9	8930479.9	Third_quote	1
Apr	2015	BALSA ABUNA	Anopheles darlingi	-9.666732	-65.435894	232692.9	8930479.9	Third_quote	1
Apr	2015	BALSA ABUNA	Anopheles darlingi	-9.666732	-65.435894	232692.9	8930479.9	Third_quote	1
Apr	2015	BALSA ABUNA	Anopheles darlingi	-9.666732	-65.435894	232692.9	8930479.9	Third_quote	1
Apr	2015	BALSA ABUNA	Anopheles darlingi	-9.666732	-65.435894	232692.9	8930479.9	Third_quote	1
Apr	2015	BALSA ABUNA	Anopheles darlingi	-9.666732	-65.435894	232692.9	8930479.9	Third_quote	1
Apr	2015	BALSA ABUNA	Anopheles darlingi	-9.666732	-65.435894	232692.9	8930479.9	Third_quote	1
Apr	2015	BALSA ABUNA	Anopheles darlingi	-9.666732	-65.435894	232692.9	8930479.9	Third_quote	1
Apr	2015	BALSA ABUNA	Anopheles darlingi	-9.666732	-65.435894	232692.9	8930479.9	Third_quote	1
Apr	2015	BALSA ABUNA	Anopheles darlingi	-9.666732	-65.435894	232692.9	8930479.9	Third_quote	1
Apr	2015	BALSA ABUNA	Anopheles darlingi	-9.666732	-65.435894	232692.9	8930479.9	Third_quote	1
Apr	2015	BALSA ABUNA	Anopheles darlingi	-9.666732	-65.435894	232692.9	8930479.9	Third_quote	1
Apr	2015	BALSA ABUNA	Anopheles darlingi	-9.666732	-65.435894	232692.9	8930479.9	Third_quote	1
Apr	2015	BALSA ABUNA	Anopheles darlingi	-9.666732	-65.435894	232692.9	8930479.9	Third_quote	1
Apr	2015	BALSA ABUNA	Anopheles darlingi	-9.666732	-65.435894	232692.9	8930479.9	Third_quote	1
Apr	2015	BALSA ABUNA	Anopheles darlingi	-9.666732	-65.435894	232692.9	8930479.9	Third_quote	1
Apr	2015	BALSA ABUNA	Anopheles darlingi	-9.666732	-65.435894	232692.9	8930479.9	Third_quote	1
Apr	2015	BALSA ABUNA	Anopheles darlingi	-9.666732	-65.435894	232692.9	8930479.9	Third_quote	1
Apr	2015	BALSA ABUNA	Anopheles darlingi	-9.666732	-65.435894	232692.9	8930479.9	Third_quote	1
Aug	2011	MUTUM PARANA	Anopheles braziliensis	-9.621065	-64.94316	286757.6	8935878.9	Pre_flood	1
Aug	2011	MUTUM PARANA	Anopheles braziliensis	-9.621065	-64.94316	286757.6	8935878.9	Pre_flood	1
Aug	2011	MUTUM PARANA	Anopheles braziliensis	-9.621065	-64.94316	286757.6	8935878.9	Pre_flood	1
Aug	2011	MUTUM PARANA	Anopheles braziliensis	-9.621065	-64.94316	286757.6	8935878.9	Pre_flood	1
Aug	2011	MUTUM PARANA	Anopheles braziliensis	-9.621065	-64.94316	286757.6	8935878.9	Pre_flood	1
Aug	2011	MUTUM PARANA	Anopheles nuneztovari	-9.621065	-64.94316	286757.6	8935878.9	Pre_flood	1
Aug	2011	MUTUM PARANA	Anopheles braziliensis	-9.621065	-64.94316	286757.6	8935878.9	Pre_flood	1
Aug	2011	POLIGONAL MARGEM ESQUERDA	Anopheles darlingi	-9.229662	-64.65125	318596.5	8979337.5	Pre_flood	1
Aug	2011	MUTUM PARANA	Anopheles braziliensis	-9.621065	-64.94316	286757.6	8935878.9	Pre_flood	1
Aug	2011	MUTUM PARANA	Anopheles braziliensis	-9.621065	-64.94316	286757.6	8935878.9	Pre_flood	1
Aug	2011	MUTUM PARANA	Anopheles braziliensis	-9.621065	-64.94316	286757.6	8935878.9	Pre_flood	1
Aug	2011	MUTUM PARANA	Anopheles braziliensis	-9.621065	-64.94316	286757.6	8935878.9	Pre_flood	1
Aug	2011	MUTUM PARANA	Anopheles braziliensis	-9.621065	-64.94316	286757.6	8935878.9	Pre_flood	1
Aug	2011	MUTUM PARANA	Anopheles braziliensis	-9.621065	-64.94316	286757.6	8935878.9	Pre_flood	1
Aug	2011	MUTUM PARANA	Anopheles braziliensis	-9.621065	-64.94316	286757.6	8935878.9	Pre_flood	1
Aug	2011	MUTUM PARANA	Anopheles darlingi	-9.621065	-64.94316	286757.6	8935878.9	Pre_flood	1
Aug	2011	MUTUM PARANA	Anopheles darlingi	-9.621065	-64.94316	286757.6	8935878.9	Pre_flood	1
Aug	2011	POLIGONAL MARGEM ESQUERDA	Anopheles darlingi	-9.229662	-64.65125	318596.5	8979337.5	Pre_flood	1
Aug	2012	POLIGONAL MARGEM ESQUERDA	Anopheles darlingi	-9.229662	-64.65125	318596.5	8979337.5	Pre_flood	1
Aug	2012	POLIGONAL MARGEM ESQUERDA	Anopheles darlingi	-9.229662	-64.65125	318596.5	8979337.5	Pre_flood	1
Aug	2012	POLIGONAL MARGEM ESQUERDA	Anopheles darlingi	-9.229662	-64.65125	318596.5	8979337.5	Pre_flood	1
Aug	2012	POLIGONAL MARGEM ESQUERDA	Anopheles darlingi	-9.229662	-64.65125	318596.5	8979337.5	Pre_flood	1
Aug	2012	POLIGONAL MARGEM ESQUERDA	Anopheles darlingi	-9.229662	-64.65125	318596.5	8979337.5	Pre_flood	1
Aug	2012	POLIGONAL MARGEM ESQUERDA	Anopheles darlingi	-9.229662	-64.65125	318596.5	8979337.5	Pre_flood	1
Aug	2012	JACI PARANA	Anopheles darlingi	-9.259651	-64.395767	346682.2	8976140.8	Pre_flood	1
Aug	2012	POLIGONAL MARGEM ESQUERDA	Anopheles darlingi	-9.229662	-64.65125	318596.5	8979337.5	Pre_flood	1
Aug	2012	POLIGONAL MARGEM ESQUERDA	Anopheles darlingi	-9.229662	-64.65125	318596.5	8979337.5	Pre_flood	1
Aug	2012	POLIGONAL MARGEM ESQUERDA	Anopheles darlingi	-9.229662	-64.65125	318596.5	8979337.5	Pre_flood	1
Aug	2012	POLIGONAL MARGEM ESQUERDA	Anopheles darlingi	-9.229662	-64.65125	318596.5	8979337.5	Pre_flood	1
Aug	2012	POLIGONAL MARGEM ESQUERDA	Anopheles darlingi	-9.229662	-64.65125	318596.5	8979337.5	Pre_flood	1
Aug	2012	POLIGONAL MARGEM ESQUERDA	Anopheles darlingi	-9.229662	-64.65125	318596.5	8979337.5	Pre_flood	1
Aug	2012	POLIGONAL MARGEM ESQUERDA	Anopheles darlingi	-9.229662	-64.65125	318596.5	8979337.5	Pre_flood	1
Aug	2012	POLIGONAL MARGEM ESQUERDA	Anopheles darlingi	-9.229662	-64.65125	318596.5	8979337.5	Pre_flood	1
Aug	2012	JACI PARANA	Anopheles triannulatus	-9.259651	-64.395767	346682.2	8976140.8	Pre_flood	1
Aug	2012	JACI PARANA	Anopheles triannulatus	-9.259651	-64.395767	346682.2	8976140.8	Pre_flood	1
Aug	2012	JACI PARANA	Anopheles darlingi	-9.259651	-64.395767	346682.2	8976140.8	Pre_flood	1
Aug	2012	JACI PARANA	Anopheles darlingi	-9.259651	-64.395767	346682.2	8976140.8	Pre_flood	1
Aug	2012	JACI PARANA	Anopheles darlingi	-9.259651	-64.395767	346682.2	8976140.8	Pre_flood	1
Aug	2012	JACI PARANA	Anopheles darlingi	-9.259651	-64.395767	346682.2	8976140.8	Pre_flood	1
Aug	2012	POLIGONAL MARGEM ESQUERDA	Anopheles darlingi	-9.229662	-64.65125	318596.5	8979337.5	Pre_flood	1
Aug	2012	POLIGONAL MARGEM ESQUERDA	Anopheles darlingi	-9.229662	-64.65125	318596.5	8979337.5	Pre_flood	1
Aug	2012	POLIGONAL MARGEM ESQUERDA	Anopheles darlingi	-9.229662	-64.65125	318596.5	8979337.5	Pre_flood	1
Aug	2012	POLIGONAL MARGEM ESQUERDA	Anopheles darlingi	-9.229662	-64.65125	318596.5	8979337.5	Pre_flood	1
Aug	2012	POLIGONAL MARGEM ESQUERDA	Anopheles darlingi	-9.229662	-64.65125	318596.5	8979337.5	Pre_flood	1
Aug	2012	POLIGONAL MARGEM ESQUERDA	Anopheles darlingi	-9.229662	-64.65125	318596.5	8979337.5	Pre_flood	1
Aug	2012	POLIGONAL MARGEM ESQUERDA	Anopheles darlingi	-9.229662	-64.65125	318596.5	8979337.5	Pre_flood	1
Aug	2012	POLIGONAL MARGEM ESQUERDA	Anopheles darlingi	-9.229662	-64.65125	318596.5	8979337.5	Pre_flood	1
Aug	2012	POLIGONAL MARGEM ESQUERDA	Anopheles darlingi	-9.229662	-64.65125	318596.5	8979337.5	Pre_flood	1
Aug	2012	POLIGONAL MARGEM ESQUERDA	Anopheles darlingi	-9.229662	-64.65125	318596.5	8979337.5	Pre_flood	1
Aug	2012	POLIGONAL MARGEM ESQUERDA	Anopheles darlingi	-9.229662	-64.65125	318596.5	8979337.5	Pre_flood	1
Aug	2012	POLIGONAL MARGEM ESQUERDA	Anopheles darlingi	-9.229662	-64.65125	318596.5	8979337.5	Pre_flood	1
Aug	2012	POLIGONAL MARGEM ESQUERDA	Anopheles darlingi	-9.229662	-64.65125	318596.5	8979337.5	Pre_flood	1
Aug	2012	POLIGONAL MARGEM ESQUERDA	Anopheles darlingi	-9.229662	-64.65125	318596.5	8979337.5	Pre_flood	1
Aug	2012	POLIGONAL MARGEM ESQUERDA	Anopheles darlingi	-9.229662	-64.65125	318596.5	8979337.5	Pre_flood	1
Aug	2012	POLIGONAL MARGEM ESQUERDA	Anopheles darlingi	-9.229662	-64.65125	318596.5	8979337.5	Pre_flood	1
Aug	2012	POLIGONAL MARGEM ESQUERDA	Anopheles darlingi	-9.229662	-64.65125	318596.5	8979337.5	Pre_flood	1
Aug	2012	POLIGONAL MARGEM ESQUERDA	Anopheles darlingi	-9.229662	-64.65125	318596.5	8979337.5	Pre_flood	1
Aug	2012	POLIGONAL MARGEM ESQUERDA	Anopheles darlingi	-9.229662	-64.65125	318596.5	8979337.5	Pre_flood	1
Aug	2012	POLIGONAL MARGEM ESQUERDA	Anopheles darlingi	-9.229662	-64.65125	318596.5	8979337.5	Pre_flood	1
Aug	2012	POLIGONAL MARGEM ESQUERDA	Anopheles darlingi	-9.229662	-64.65125	318596.5	8979337.5	Pre_flood	1
Aug	2012	POLIGONAL MARGEM ESQUERDA	Anopheles darlingi	-9.229662	-64.65125	318596.5	8979337.5	Pre_flood	1
Aug	2012	POLIGONAL MARGEM ESQUERDA	Anopheles darlingi	-9.229662	-64.65125	318596.5	8979337.5	Pre_flood	1
Aug	2012	POLIGONAL MARGEM ESQUERDA	Anopheles darlingi	-9.229662	-64.65125	318596.5	8979337.5	Pre_flood	1
Aug	2012	POLIGONAL MARGEM ESQUERDA	Anopheles darlingi	-9.229662	-64.65125	318596.5	8979337.5	Pre_flood	1
Aug	2012	POLIGONAL MARGEM ESQUERDA	Anopheles darlingi	-9.229662	-64.65125	318596.5	8979337.5	Pre_flood	1
Aug	2012	POLIGONAL MARGEM ESQUERDA	Anopheles darlingi	-9.229662	-64.65125	318596.5	8979337.5	Pre_flood	1
Aug	2012	POLIGONAL MARGEM ESQUERDA	Anopheles darlingi	-9.229662	-64.65125	318596.5	8979337.5	Pre_flood	1
Aug	2012	POLIGONAL MARGEM ESQUERDA	Anopheles darlingi	-9.229662	-64.65125	318596.5	8979337.5	Pre_flood	1
Aug	2012	POLIGONAL MARGEM ESQUERDA	Anopheles darlingi	-9.229662	-64.65125	318596.5	8979337.5	Pre_flood	1
Aug	2012	POLIGONAL MARGEM ESQUERDA	Anopheles darlingi	-9.229662	-64.65125	318596.5	8979337.5	Pre_flood	1
Aug	2012	POLIGONAL MARGEM ESQUERDA	Anopheles darlingi	-9.229662	-64.65125	318596.5	8979337.5	Pre_flood	1
Aug	2012	POLIGONAL MARGEM ESQUERDA	Anopheles darlingi	-9.229662	-64.65125	318596.5	8979337.5	Pre_flood	1
Aug	2012	POLIGONAL MARGEM ESQUERDA	Anopheles darlingi	-9.229662	-64.65125	318596.5	8979337.5	Pre_flood	1
Aug	2012	POLIGONAL MARGEM ESQUERDA	Anopheles darlingi	-9.229662	-64.65125	318596.5	8979337.5	Pre_flood	1
Aug	2012	POLIGONAL MARGEM ESQUERDA	Anopheles darlingi	-9.229662	-64.65125	318596.5	8979337.5	Pre_flood	1
Aug	2012	POLIGONAL MARGEM ESQUERDA	Anopheles darlingi	-9.229662	-64.65125	318596.5	8979337.5	Pre_flood	1
Aug	2012	POLIGONAL MARGEM ESQUERDA	Anopheles darlingi	-9.229662	-64.65125	318596.5	8979337.5	Pre_flood	1
Aug	2012	POLIGONAL MARGEM ESQUERDA	Anopheles darlingi	-9.229662	-64.65125	318596.5	8979337.5	Pre_flood	1
Aug	2012	POLIGONAL MARGEM ESQUERDA	Anopheles darlingi	-9.229662	-64.65125	318596.5	8979337.5	Pre_flood	1
Aug	2012	POLIGONAL MARGEM ESQUERDA	Anopheles darlingi	-9.229662	-64.65125	318596.5	8979337.5	Pre_flood	1
Aug	2012	POLIGONAL MARGEM DIREITA	Anopheles darlingi	-9.245362	-64.613768	322723.1	8977619.9	Pre_flood	1
Aug	2012	POLIGONAL MARGEM DIREITA	Anopheles darlingi	-9.245362	-64.613768	322723.1	8977619.9	Pre_flood	1
Aug	2012	POLIGONAL MARGEM DIREITA	Anopheles darlingi	-9.245362	-64.613768	322723.1	8977619.9	Pre_flood	1
Aug	2012	POLIGONAL MARGEM DIREITA	Anopheles darlingi	-9.245362	-64.613768	322723.1	8977619.9	Pre_flood	1
Aug	2012	POLIGONAL MARGEM DIREITA	Anopheles darlingi	-9.245362	-64.613768	322723.1	8977619.9	Pre_flood	1
Aug	2012	POLIGONAL MARGEM DIREITA	Anopheles darlingi	-9.245362	-64.613768	322723.1	8977619.9	Pre_flood	1
Aug	2012	POLIGONAL MARGEM DIREITA	Anopheles darlingi	-9.245362	-64.613768	322723.1	8977619.9	Pre_flood	1
Aug	2012	POLIGONAL MARGEM DIREITA	Anopheles darlingi	-9.245362	-64.613768	322723.1	8977619.9	Pre_flood	1
Aug	2012	POLIGONAL MARGEM DIREITA	Anopheles darlingi	-9.245362	-64.613768	322723.1	8977619.9	Pre_flood	1
Aug	2012	POLIGONAL MARGEM DIREITA	Anopheles darlingi	-9.245362	-64.613768	322723.1	8977619.9	Pre_flood	1
Aug	2012	POLIGONAL MARGEM DIREITA	Anopheles darlingi	-9.245362	-64.613768	322723.1	8977619.9	Pre_flood	1
Aug	2012	POLIGONAL MARGEM DIREITA	Anopheles darlingi	-9.245362	-64.613768	322723.1	8977619.9	Pre_flood	1
Aug	2012	MUTUM PARANA	Anopheles darlingi	-9.621065	-64.94316	286757.6	8935878.9	Pre_flood	1
Aug	2012	MUTUM PARANA	Anopheles darlingi	-9.621065	-64.94316	286757.6	8935878.9	Pre_flood	1
Aug	2012	MUTUM PARANA	Anopheles darlingi	-9.621065	-64.94316	286757.6	8935878.9	Pre_flood	1
Aug	2012	BALSA ABUNA	Anopheles darlingi	-9.666732	-65.435894	232692.9	8930479.9	Pre_flood	1
Aug	2012	BALSA ABUNA	Anopheles darlingi	-9.666732	-65.435894	232692.9	8930479.9	Pre_flood	1
Aug	2012	BALSA ABUNA	Anopheles darlingi	-9.666732	-65.435894	232692.9	8930479.9	Pre_flood	1
Aug	2012	MUTUM PARANA	Anopheles darlingi	-9.621065	-64.94316	286757.6	8935878.9	Pre_flood	1
Aug	2012	MUTUM PARANA	Anopheles darlingi	-9.621065	-64.94316	286757.6	8935878.9	Pre_flood	1
Aug	2012	MUTUM PARANA	Anopheles darlingi	-9.621065	-64.94316	286757.6	8935878.9	Pre_flood	1
Aug	2013	MUTUM PARANA	Anopheles braziliensis	-9.621065	-64.94316	232692.9	8930479.9	Second_quote	1
Aug	2013	MUTUM PARANA	Anopheles konderi	-9.621065	-64.94316	232692.9	8930479.9	Second_quote	1
Aug	2013	MUTUM PARANA	Anopheles braziliensis	-9.621065	-64.94316	232692.9	8930479.9	Second_quote	1
Aug	2013	MUTUM PARANA	Anopheles darlingi	-9.621065	-64.94316	232692.9	8930479.9	Second_quote	1
Aug	2013	MUTUM PARANA	Anopheles deaneorum	-9.621065	-64.94316	232692.9	8930479.9	Second_quote	1
Aug	2013	MUTUM PARANA	Anopheles braziliensis	-9.621065	-64.94316	232692.9	8930479.9	Second_quote	1
Aug	2013	MUTUM PARANA	Anopheles braziliensis	-9.621065	-64.94316	232692.9	8930479.9	Second_quote	1
Aug	2013	MUTUM PARANA	Anopheles braziliensis	-9.621065	-64.94316	232692.9	8930479.9	Second_quote	1
Aug	2013	MUTUM PARANA	Anopheles braziliensis	-9.621065	-64.94316	232692.9	8930479.9	Second_quote	1
Aug	2013	MUTUM PARANA	Anopheles braziliensis	-9.621065	-64.94316	232692.9	8930479.9	Second_quote	1
Aug	2013	VILA ABUNA	Anopheles sp.	-9.676714	-65.401688	232692.9	8930479.9	Second_quote	1
Aug	2013	VILA JIRAU	Anopheles darlingi	-9.426522	-64.695708	232692.9	8930479.9	Second_quote	1
Aug	2013	VILA JIRAU	Anopheles darlingi	-9.426522	-64.695708	232692.9	8930479.9	Second_quote	1
Aug	2013	MUTUM PARANA	Anopheles braziliensis	-9.621065	-64.94316	232692.9	8930479.9	Second_quote	1
Aug	2013	MUTUM PARANA	Anopheles braziliensis	-9.621065	-64.94316	232692.9	8930479.9	Second_quote	1
Aug	2013	POLIGONAL MARGEM DIREITA	Anopheles darlingi	-9.245362	-64.613768	232692.9	8930479.9	Second_quote	1
Aug	2013	POLIGONAL MARGEM DIREITA	Anopheles darlingi	-9.245362	-64.613768	232692.9	8930479.9	Second_quote	1
Aug	2013	POLIGONAL MARGEM DIREITA	Anopheles darlingi	-9.245362	-64.613768	232692.9	8930479.9	Second_quote	1
Aug	2013	POLIGONAL MARGEM DIREITA	Anopheles darlingi	-9.245362	-64.613768	232692.9	8930479.9	Second_quote	1
Aug	2013	POLIGONAL MARGEM ESQUERDA	Anopheles darlingi	-9.229662	-64.65125	232692.9	8930479.9	Second_quote	1
Aug	2013	POLIGONAL MARGEM ESQUERDA	Anopheles darlingi	-9.229662	-64.65125	232692.9	8930479.9	Second_quote	1
Aug	2013	POLIGONAL MARGEM ESQUERDA	Anopheles darlingi	-9.229662	-64.65125	232692.9	8930479.9	Second_quote	1
Aug	2013	POLIGONAL MARGEM ESQUERDA	Anopheles darlingi	-9.229662	-64.65125	232692.9	8930479.9	Second_quote	1
Aug	2013	POLIGONAL MARGEM ESQUERDA	Anopheles darlingi	-9.229662	-64.65125	232692.9	8930479.9	Second_quote	1
Aug	2013	POLIGONAL MARGEM DIREITA	Anopheles darlingi	-9.245362	-64.613768	232692.9	8930479.9	Second_quote	1
Aug	2013	POLIGONAL MARGEM DIREITA	Anopheles darlingi	-9.245362	-64.613768	232692.9	8930479.9	Second_quote	1
Aug	2013	POLIGONAL MARGEM DIREITA	Anopheles darlingi	-9.245362	-64.613768	232692.9	8930479.9	Second_quote	1
Aug	2013	POLIGONAL MARGEM ESQUERDA	Anopheles darlingi	-9.229662	-64.65125	232692.9	8930479.9	Second_quote	1
Aug	2013	POLIGONAL MARGEM ESQUERDA	Anopheles darlingi	-9.229662	-64.65125	232692.9	8930479.9	Second_quote	1
Aug	2013	POLIGONAL MARGEM ESQUERDA	Anopheles darlingi	-9.229662	-64.65125	232692.9	8930479.9	Second_quote	1
Aug	2013	VILA ABUNA	Anopheles sp.	-9.676714	-65.401688	232692.9	8930479.9	Second_quote	1
Aug	2013	BALSA ABUNA	Anopheles triannulatus	-9.666732	-65.435894	232692.9	8930479.9	Second_quote	1
Aug	2013	POLIGONAL MARGEM ESQUERDA	Anopheles darlingi	-9.229662	-64.65125	232692.9	8930479.9	Second_quote	1
Aug	2013	POLIGONAL MARGEM ESQUERDA	Anopheles darlingi	-9.229662	-64.65125	232692.9	8930479.9	Second_quote	1
Aug	2013	POLIGONAL MARGEM ESQUERDA	Anopheles darlingi	-9.229662	-64.65125	232692.9	8930479.9	Second_quote	1
Aug	2013	POLIGONAL MARGEM ESQUERDA	Anopheles darlingi	-9.229662	-64.65125	232692.9	8930479.9	Second_quote	1
Aug	2014	VILA JIRAU	Anopheles darlingi	-9.426522	-64.695708	346682.2	8976140.8	Third_quote	1
Aug	2014	VILA JIRAU	Anopheles darlingi	-9.426522	-64.695708	346682.2	8976140.8	Third_quote	1
Aug	2014	VILA JIRAU	Anopheles darlingi	-9.426522	-64.695708	346682.2	8976140.8	Third_quote	1
Aug	2014	VILA JIRAU	Anopheles darlingi	-9.426522	-64.695708	346682.2	8976140.8	Third_quote	1
Aug	2014	VILA JIRAU	Anopheles darlingi	-9.426522	-64.695708	346682.2	8976140.8	Third_quote	1
Aug	2014	VILA JIRAU	Anopheles darlingi	-9.426522	-64.695708	346682.2	8976140.8	Third_quote	1
Aug	2014	POLIGONAL MARGEM ESQUERDA	Anopheles darlingi	-9.229662	-64.65125	346682.2	8976140.8	Third_quote	1
Aug	2014	VILA ABUNA	Anopheles darlingi	-9.676714	-65.401688	346682.2	8976140.8	Third_quote	1
Aug	2014	VILA JIRAU	Anopheles darlingi	-9.426522	-64.695708	346682.2	8976140.8	Third_quote	1
Aug	2014	VILA JIRAU	Anopheles darlingi	-9.426522	-64.695708	346682.2	8976140.8	Third_quote	1
Aug	2014	VILA JIRAU	Anopheles darlingi	-9.426522	-64.695708	346682.2	8976140.8	Third_quote	1
Aug	2014	VILA JIRAU	Anopheles darlingi	-9.426522	-64.695708	346682.2	8976140.8	Third_quote	1
Aug	2014	VILA JIRAU	Anopheles darlingi	-9.426522	-64.695708	346682.2	8976140.8	Third_quote	1
Aug	2014	VILA JIRAU	Anopheles sp.	-9.426522	-64.695708	346682.2	8976140.8	Third_quote	1
Aug	2014	BALSA ABUNA	Anopheles darlingi	-9.666732	-65.435894	346682.2	8976140.8	Third_quote	1
Aug	2014	BALSA ABUNA	Anopheles darlingi	-9.666732	-65.435894	346682.2	8976140.8	Third_quote	1
Aug	2014	BALSA ABUNA	Anopheles darlingi	-9.666732	-65.435894	346682.2	8976140.8	Third_quote	1
Aug	2014	BALSA ABUNA	Anopheles darlingi	-9.666732	-65.435894	346682.2	8976140.8	Third_quote	1
Aug	2014	BALSA ABUNA	Anopheles darlingi	-9.666732	-65.435894	346682.2	8976140.8	Third_quote	1
Aug	2014	BALSA ABUNA	Anopheles darlingi	-9.666732	-65.435894	346682.2	8976140.8	Third_quote	1
Aug	2014	BALSA ABUNA	Anopheles darlingi	-9.666732	-65.435894	346682.2	8976140.8	Third_quote	1
Aug	2014	BALSA ABUNA	Anopheles darlingi	-9.666732	-65.435894	346682.2	8976140.8	Third_quote	1
Aug	2014	BALSA ABUNA	Anopheles darlingi	-9.666732	-65.435894	346682.2	8976140.8	Third_quote	1
Aug	2014	BALSA ABUNA	Anopheles darlingi	-9.666732	-65.435894	346682.2	8976140.8	Third_quote	1
Aug	2014	BALSA ABUNA	Anopheles darlingi	-9.666732	-65.435894	346682.2	8976140.8	Third_quote	1
Aug	2014	BALSA ABUNA	Anopheles darlingi	-9.666732	-65.435894	346682.2	8976140.8	Third_quote	1
Aug	2014	BALSA ABUNA	Anopheles darlingi	-9.666732	-65.435894	346682.2	8976140.8	Third_quote	1
Aug	2014	BALSA ABUNA	Anopheles darlingi	-9.666732	-65.435894	346682.2	8976140.8	Third_quote	1
Aug	2014	VILA JIRAU	Anopheles darlingi	-9.426522	-64.695708	346682.2	8976140.8	Third_quote	1
Aug	2014	VILA JIRAU	Anopheles darlingi	-9.426522	-64.695708	346682.2	8976140.8	Third_quote	1
Aug	2014	VILA JIRAU	Anopheles darlingi	-9.426522	-64.695708	346682.2	8976140.8	Third_quote	1
Aug	2014	VILA JIRAU	Anopheles darlingi	-9.426522	-64.695708	346682.2	8976140.8	Third_quote	1
Aug	2014	VILA JIRAU	Anopheles darlingi	-9.426522	-64.695708	346682.2	8976140.8	Third_quote	1
Aug	2014	VILA JIRAU	Anopheles darlingi	-9.426522	-64.695708	346682.2	8976140.8	Third_quote	1
Aug	2014	VILA JIRAU	Anopheles darlingi	-9.426522	-64.695708	346682.2	8976140.8	Third_quote	1
Aug	2014	VILA JIRAU	Anopheles darlingi	-9.426522	-64.695708	346682.2	8976140.8	Third_quote	1
Aug	2014	VILA JIRAU	Anopheles darlingi	-9.426522	-64.695708	346682.2	8976140.8	Third_quote	1
Aug	2014	VILA JIRAU	Anopheles darlingi	-9.426522	-64.695708	346682.2	8976140.8	Third_quote	1
Aug	2014	VILA JIRAU	Anopheles darlingi	-9.426522	-64.695708	346682.2	8976140.8	Third_quote	1
Aug	2014	VILA JIRAU	Anopheles darlingi	-9.426522	-64.695708	346682.2	8976140.8	Third_quote	1
Aug	2014	VILA JIRAU	Anopheles darlingi	-9.426522	-64.695708	346682.2	8976140.8	Third_quote	1
Aug	2014	VILA JIRAU	Anopheles darlingi	-9.426522	-64.695708	346682.2	8976140.8	Third_quote	1
Aug	2014	VILA JIRAU	Anopheles darlingi	-9.426522	-64.695708	346682.2	8976140.8	Third_quote	1
Aug	2014	VILA JIRAU	Anopheles darlingi	-9.426522	-64.695708	346682.2	8976140.8	Third_quote	1
Aug	2014	VILA JIRAU	Anopheles darlingi	-9.426522	-64.695708	346682.2	8976140.8	Third_quote	1
Aug	2014	VILA JIRAU	Anopheles darlingi	-9.426522	-64.695708	346682.2	8976140.8	Third_quote	1
Aug	2014	VILA JIRAU	Anopheles darlingi	-9.426522	-64.695708	346682.2	8976140.8	Third_quote	1
Aug	2014	VILA JIRAU	Anopheles darlingi	-9.426522	-64.695708	346682.2	8976140.8	Third_quote	1
Aug	2014	VILA JIRAU	Anopheles darlingi	-9.426522	-64.695708	346682.2	8976140.8	Third_quote	1
Aug	2014	VILA JIRAU	Anopheles darlingi	-9.426522	-64.695708	346682.2	8976140.8	Third_quote	1
Aug	2014	VILA JIRAU	Anopheles darlingi	-9.426522	-64.695708	346682.2	8976140.8	Third_quote	1
Aug	2014	VILA JIRAU	Anopheles darlingi	-9.426522	-64.695708	346682.2	8976140.8	Third_quote	1
Aug	2014	VILA JIRAU	Anopheles darlingi	-9.426522	-64.695708	346682.2	8976140.8	Third_quote	1
Aug	2014	VILA JIRAU	Anopheles darlingi	-9.426522	-64.695708	346682.2	8976140.8	Third_quote	1
Aug	2014	VILA JIRAU	Anopheles darlingi	-9.426522	-64.695708	346682.2	8976140.8	Third_quote	1
Aug	2014	VILA JIRAU	Anopheles darlingi	-9.426522	-64.695708	346682.2	8976140.8	Third_quote	1
Aug	2014	VILA JIRAU	Anopheles darlingi	-9.426522	-64.695708	346682.2	8976140.8	Third_quote	1
Aug	2014	VILA JIRAU	Anopheles darlingi	-9.426522	-64.695708	346682.2	8976140.8	Third_quote	1
Aug	2014	VILA JIRAU	Anopheles darlingi	-9.426522	-64.695708	346682.2	8976140.8	Third_quote	1
Aug	2014	VILA JIRAU	Anopheles darlingi	-9.426522	-64.695708	346682.2	8976140.8	Third_quote	1
Aug	2014	VILA JIRAU	Anopheles darlingi	-9.426522	-64.695708	346682.2	8976140.8	Third_quote	1
Aug	2015	VILA JIRAU	Anopheles darlingi	-9.426522	-64.695708	313815.5	8957540.8	Third_quote	1
Aug	2015	VILA JIRAU	Anopheles darlingi	-9.426522	-64.695708	313815.5	8957540.8	Third_quote	1
Aug	2015	VILA JIRAU	Anopheles darlingi	-9.426522	-64.695708	313815.5	8957540.8	Third_quote	1
Aug	2015	VILA JIRAU	Anopheles darlingi	-9.426522	-64.695708	313815.5	8957540.8	Third_quote	1
Aug	2015	BALSA ABUNA	Anopheles darlingi	-9.666732	-65.435894	232692.9	8930479.9	Third_quote	1
Aug	2015	BALSA ABUNA	Anopheles darlingi	-9.666732	-65.435894	232692.9	8930479.9	Third_quote	1
Aug	2015	BALSA ABUNA	Anopheles darlingi	-9.666732	-65.435894	232692.9	8930479.9	Third_quote	1
Aug	2015	BALSA ABUNA	Anopheles darlingi	-9.666732	-65.435894	232692.9	8930479.9	Third_quote	1
Aug	2015	BALSA ABUNA	Anopheles darlingi	-9.666732	-65.435894	232692.9	8930479.9	Third_quote	1
Aug	2015	BALSA ABUNA	Anopheles darlingi	-9.666732	-65.435894	232692.9	8930479.9	Third_quote	1
Aug	2015	BALSA ABUNA	Anopheles darlingi	-9.666732	-65.435894	232692.9	8930479.9	Third_quote	1
Dec	2011	MUTUM PARANA	Anopheles braziliensis	-9.621065	-64.94316	286757.6	8935878.9	Pre_flood	1
Dec	2011	MUTUM PARANA	Anopheles braziliensis	-9.621065	-64.94316	286757.6	8935878.9	Pre_flood	1
Dec	2011	MUTUM PARANA	Anopheles braziliensis	-9.621065	-64.94316	286757.6	8935878.9	Pre_flood	1
Dec	2011	MUTUM PARANA	Anopheles braziliensis	-9.621065	-64.94316	286757.6	8935878.9	Pre_flood	1
Dec	2011	MUTUM PARANA	Anopheles braziliensis	-9.621065	-64.94316	286757.6	8935878.9	Pre_flood	1
Dec	2011	MUTUM PARANA	Anopheles braziliensis	-9.621065	-64.94316	286757.6	8935878.9	Pre_flood	1
Dec	2011	MUTUM PARANA	Anopheles braziliensis	-9.621065	-64.94316	286757.6	8935878.9	Pre_flood	1
Dec	2011	MUTUM PARANA	Anopheles braziliensis	-9.621065	-64.94316	286757.6	8935878.9	Pre_flood	1
Dec	2011	MUTUM PARANA	Anopheles braziliensis	-9.621065	-64.94316	286757.6	8935878.9	Pre_flood	1
Dec	2011	MUTUM PARANA	Anopheles braziliensis	-9.621065	-64.94316	286757.6	8935878.9	Pre_flood	1
Dec	2011	POLIGONAL MARGEM ESQUERDA	Anopheles darlingi	-9.229662	-64.65125	318596.5	8979337.5	Pre_flood	1
Dec	2011	POLIGONAL MARGEM ESQUERDA	Anopheles darlingi	-9.229662	-64.65125	318596.5	8979337.5	Pre_flood	1
Dec	2011	POLIGONAL MARGEM ESQUERDA	Anopheles darlingi	-9.229662	-64.65125	318596.5	8979337.5	Pre_flood	1
Dec	2011	MUTUM PARANA	Anopheles braziliensis	-9.621065	-64.94316	286757.6	8935878.9	Pre_flood	1
Dec	2011	MUTUM PARANA	Anopheles braziliensis	-9.621065	-64.94316	286757.6	8935878.9	Pre_flood	1
Dec	2011	MUTUM PARANA	Anopheles braziliensis	-9.621065	-64.94316	286757.6	8935878.9	Pre_flood	1
Dec	2011	MUTUM PARANA	Anopheles braziliensis	-9.621065	-64.94316	286757.6	8935878.9	Pre_flood	1
Dec	2011	MUTUM PARANA	Anopheles braziliensis	-9.621065	-64.94316	286757.6	8935878.9	Pre_flood	1
Dec	2011	MUTUM PARANA	Anopheles braziliensis	-9.621065	-64.94316	286757.6	8935878.9	Pre_flood	1
Dec	2011	MUTUM PARANA	Anopheles braziliensis	-9.621065	-64.94316	286757.6	8935878.9	Pre_flood	1
Dec	2011	MUTUM PARANA	Anopheles braziliensis	-9.621065	-64.94316	286757.6	8935878.9	Pre_flood	1
Dec	2011	MUTUM PARANA	Anopheles braziliensis	-9.621065	-64.94316	286757.6	8935878.9	Pre_flood	1
Dec	2011	MUTUM PARANA	Anopheles braziliensis	-9.621065	-64.94316	286757.6	8935878.9	Pre_flood	1
Dec	2011	MUTUM PARANA	Anopheles braziliensis	-9.621065	-64.94316	286757.6	8935878.9	Pre_flood	1
Dec	2011	MUTUM PARANA	Anopheles braziliensis	-9.621065	-64.94316	286757.6	8935878.9	Pre_flood	1
Dec	2011	MUTUM PARANA	Anopheles braziliensis	-9.621065	-64.94316	286757.6	8935878.9	Pre_flood	1
Dec	2011	MUTUM PARANA	Anopheles braziliensis	-9.621065	-64.94316	286757.6	8935878.9	Pre_flood	1
Dec	2011	MUTUM PARANA	Anopheles braziliensis	-9.621065	-64.94316	286757.6	8935878.9	Pre_flood	1
Dec	2011	MUTUM PARANA	Anopheles darlingi	-9.621065	-64.94316	286757.6	8935878.9	Pre_flood	1
Dec	2011	MUTUM PARANA	Anopheles darlingi	-9.621065	-64.94316	286757.6	8935878.9	Pre_flood	1
Dec	2011	MUTUM PARANA	Anopheles darlingi	-9.621065	-64.94316	286757.6	8935878.9	Pre_flood	1
Dec	2011	MUTUM PARANA	Anopheles darlingi	-9.621065	-64.94316	286757.6	8935878.9	Pre_flood	1
Dec	2011	MUTUM PARANA	Anopheles konderi	-9.621065	-64.94316	286757.6	8935878.9	Pre_flood	1
Dec	2011	MUTUM PARANA	Anopheles nuneztovari	-9.621065	-64.94316	286757.6	8935878.9	Pre_flood	1
Dec	2011	MUTUM PARANA	Anopheles nuneztovari	-9.621065	-64.94316	286757.6	8935878.9	Pre_flood	1
Dec	2011	VILA ABUNA	Anopheles darlingi	-9.676714	-65.401688	239952.3	8958283.7	Pre_flood	1
Dec	2011	VILA ABUNA	Anopheles darlingi	-9.676714	-65.401688	239952.3	8958283.7	Pre_flood	1
Dec	2011	MUTUM PARANA	Anopheles darlingi	-9.621065	-64.94316	286757.6	8935878.9	Pre_flood	1
Dec	2011	MUTUM PARANA	Anopheles darlingi	-9.621065	-64.94316	286757.6	8935878.9	Pre_flood	1
Dec	2011	MUTUM PARANA	Anopheles darlingi	-9.621065	-64.94316	286757.6	8935878.9	Pre_flood	1
Dec	2011	MUTUM PARANA	Anopheles darlingi	-9.621065	-64.94316	286757.6	8935878.9	Pre_flood	1
Dec	2011	MUTUM PARANA	Anopheles nuneztovari	-9.621065	-64.94316	286757.6	8935878.9	Pre_flood	1
Dec	2011	MUTUM PARANA	Anopheles nuneztovari	-9.621065	-64.94316	286757.6	8935878.9	Pre_flood	1
Dec	2011	VILA ABUNA	Anopheles darlingi	-9.676714	-65.401688	239952.3	8958283.7	Pre_flood	1
Dec	2011	VILA ABUNA	Anopheles darlingi	-9.676714	-65.401688	239952.3	8958283.7	Pre_flood	1
Dec	2011	MUTUM PARANA	Anopheles braziliensis	-9.621065	-64.94316	286757.6	8935878.9	Pre_flood	1
Dec	2011	MUTUM PARANA	Anopheles braziliensis	-9.621065	-64.94316	286757.6	8935878.9	Pre_flood	1
Dec	2011	MUTUM PARANA	Anopheles braziliensis	-9.621065	-64.94316	286757.6	8935878.9	Pre_flood	1
Dec	2011	MUTUM PARANA	Anopheles darlingi	-9.621065	-64.94316	286757.6	8935878.9	Pre_flood	1
Dec	2011	VILA ABUNA	Anopheles darlingi	-9.676714	-65.401688	239952.3	8958283.7	Pre_flood	1
Dec	2011	MUTUM PARANA	Anopheles darlingi	-9.621065	-64.94316	286757.6	8935878.9	Pre_flood	1
Dec	2011	MUTUM PARANA	Anopheles darlingi	-9.621065	-64.94316	286757.6	8935878.9	Pre_flood	1
Dec	2011	MUTUM PARANA	Anopheles darlingi	-9.621065	-64.94316	286757.6	8935878.9	Pre_flood	1
Dec	2011	MUTUM PARANA	Anopheles darlingi	-9.621065	-64.94316	286757.6	8935878.9	Pre_flood	1
Dec	2011	MUTUM PARANA	Anopheles darlingi	-9.621065	-64.94316	286757.6	8935878.9	Pre_flood	1
Dec	2011	VILA ABUNA	Anopheles darlingi	-9.676714	-65.401688	239952.3	8958283.7	Pre_flood	1
Dec	2011	MUTUM PARANA	Anopheles braziliensis	-9.621065	-64.94316	286757.6	8935878.9	Pre_flood	1
Dec	2011	MUTUM PARANA	Anopheles braziliensis	-9.621065	-64.94316	286757.6	8935878.9	Pre_flood	1
Dec	2011	MUTUM PARANA	Anopheles darlingi	-9.621065	-64.94316	286757.6	8935878.9	Pre_flood	1
Dec	2011	MUTUM PARANA	Anopheles darlingi	-9.621065	-64.94316	286757.6	8935878.9	Pre_flood	1
Dec	2011	MUTUM PARANA	Anopheles darlingi	-9.621065	-64.94316	286757.6	8935878.9	Pre_flood	1
Dec	2011	MUTUM PARANA	Anopheles darlingi	-9.621065	-64.94316	286757.6	8935878.9	Pre_flood	1
Dec	2011	VILA ABUNA	Anopheles darlingi	-9.676714	-65.401688	239952.3	8958283.7	Pre_flood	1
Dec	2012	VILA JIRAU	Anopheles darlingi	-9.426522	-64.695708	313815.5	8957540.8	First_quote	1
Dec	2012	VILA JIRAU	Anopheles darlingi	-9.426522	-64.695708	313815.5	8957540.8	First_quote	1
Dec	2012	VILA JIRAU	Anopheles darlingi	-9.426522	-64.695708	313815.5	8957540.8	First_quote	1
Dec	2012	VILA JIRAU	Anopheles darlingi	-9.426522	-64.695708	313815.5	8957540.8	First_quote	1
Dec	2012	VILA JIRAU	Anopheles darlingi	-9.426522	-64.695708	313815.5	8957540.8	First_quote	1
Dec	2012	BALSA ABUNA	Anopheles darlingi	-9.666732	-65.435894	232692.9	8930479.9	First_quote	1
Dec	2012	BALSA ABUNA	Anopheles darlingi	-9.666732	-65.435894	232692.9	8930479.9	First_quote	1
Dec	2012	BALSA ABUNA	Anopheles darlingi	-9.666732	-65.435894	232692.9	8930479.9	First_quote	1
Dec	2012	BALSA ABUNA	Anopheles darlingi	-9.666732	-65.435894	232692.9	8930479.9	First_quote	1
Dec	2012	BALSA ABUNA	Anopheles darlingi	-9.666732	-65.435894	232692.9	8930479.9	First_quote	1
Dec	2012	BALSA ABUNA	Anopheles darlingi	-9.666732	-65.435894	232692.9	8930479.9	First_quote	1
Dec	2012	BALSA ABUNA	Anopheles darlingi	-9.666732	-65.435894	232692.9	8930479.9	First_quote	1
Dec	2012	BALSA ABUNA	Anopheles darlingi	-9.666732	-65.435894	232692.9	8930479.9	First_quote	1
Dec	2012	MUTUM PARANA	Anopheles darlingi	-9.621065	-64.94316	286757.6	8935878.9	First_quote	1
Dec	2012	MUTUM PARANA	Anopheles darlingi	-9.621065	-64.94316	286757.6	8935878.9	First_quote	1
Dec	2012	MUTUM PARANA	Anopheles darlingi	-9.621065	-64.94316	286757.6	8935878.9	First_quote	1
Dec	2012	JACI PARANA	Anopheles darlingi	-9.259651	-64.395767	346682.2	8976140.8	First_quote	1
Dec	2012	JACI PARANA	Anopheles darlingi	-9.259651	-64.395767	346682.2	8976140.8	First_quote	1
[truncated: 4,348 more rows]
